# Supplementary material
Source: PubMed Central journal article supplement (PMC6692679)
Supplement: jama-322-524-s001.pdf [file jama-322-524-s001.pdf]

1  
2  
3  
4  
5  
6  
7  
8  
9  
10  
11  
12  
13  
14  
15  
16

# **Systolic Blood Pressure Intervention Trial (SPRINT)**

**Protocol Version 5.0**

**October 15, 2015**

## Table of Contents

|    |                                                                                  |    |
|----|----------------------------------------------------------------------------------|----|
| 17 |                                                                                  |    |
| 18 |                                                                                  |    |
| 19 | Executive Summary .....                                                          | 1  |
| 20 |                                                                                  |    |
| 21 | Chapter 1 – Introduction and Background .....                                    | 4  |
| 22 |                                                                                  |    |
| 23 | Chapter 2 – Overview of Trial Design .....                                       | 13 |
| 24 |                                                                                  |    |
| 25 | Chapter 3 – Participant Selection.....                                           | 16 |
| 26 |                                                                                  |    |
| 27 | Chapter 4 – Intervention.....                                                    | 24 |
| 28 |                                                                                  |    |
| 29 | Chapter 5 – Measurements and Follow-up .....                                     | 32 |
| 30 |                                                                                  |    |
| 31 | Chapter 6 – SPRINT MIND .....                                                    | 39 |
| 32 |                                                                                  |    |
| 33 | Chapter 7 – Health-Related Quality of Life and Economic Analyses .....           | 46 |
| 34 |                                                                                  |    |
| 35 | Chapter 8 – Safety Monitoring and Reporting.....                                 | 52 |
| 36 |                                                                                  |    |
| 37 | Chapter 9 – Clinical Outcome Measures .....                                      | 56 |
| 38 |                                                                                  |    |
| 39 | Chapter 10 – Statistical Considerations .....                                    | 60 |
| 40 |                                                                                  |    |
| 41 | Chapter 11 – Data Management.....                                                | 69 |
| 42 |                                                                                  |    |
| 43 | Chapter 12 – Quality Control.....                                                | 72 |
| 44 |                                                                                  |    |
| 45 | Chapter 13 – Study Organization.....                                             | 78 |
| 46 |                                                                                  |    |
| 47 | References – .....                                                               | 87 |
| 48 |                                                                                  |    |
| 49 | Appendices:                                                                      |    |
| 50 |                                                                                  |    |
| 51 | Appendix 1: Abbreviations Used                                                   |    |
| 52 | Appendix 2: Computational Details and Sensitivity Analyses for the CVD outcomes  |    |
| 53 | Appendix 3: Computational Details and Sensitivity Analyses for the MIND outcomes |    |
| 54 | Appendix 4: SPRINT Organizational Chart                                          |    |
| 55 | Appendix 5: Membership and Charges of the Committees and Subcommittees           |    |
| 56 | Appendix 6: Participating Sites                                                  |    |
| 57 |                                                                                  |    |
| 58 |                                                                                  |    |
| 59 |                                                                                  |    |
| 60 |                                                                                  |    |
| 61 |                                                                                  |    |
| 62 |                                                                                  |    |

63 **SPRINT Protocol**  
64 **Executive Summary**

65  
66  
67 **SPECIAL UPDATE TO PROTOCOL VERSION 5.0:**

68  
69 ***On August 4, 2015, the SPRINT Data and Safety Monitoring Board (DSMB)***  
70 ***recommended unmasking trial investigators and notifying participants of the lower***  
71 ***rate of cardiovascular outcomes and total mortality in the intensive arm. The board***  
72 ***also recommended developing a transition plan for collecting additional outcome data***  
73 ***and for managing study participants' blood pressure. In addition, the DSMB***  
74 ***recommended promptly modifying the protocol to reflect the changes required by this***  
75 ***early finding of benefit in the intensive arm of the trial.***

76  
77 ***The NHLBI accepted the DSMB recommendations on August 20, 2015, and asked the***  
78 ***SPRINT Steering Committee to rapidly implement these recommendations, including***  
79 ***notifying SPRINT staff and study participants. These notifications occurred during the***  
80 ***week of September 8-11, 2015, with the goal of informing staff of this news in advance***  
81 ***of the participants receiving their letters. Participant letters were mailed on***  
82 ***September 8, 2015.***

83  
84 ***This protocol modification incorporates changes required for discontinuing the blood***  
85 ***pressure intervention (see Chapter 4) and outlines the measurements that will be***  
86 ***taken at closeout visits (see Chapter 5). The goals are to continue ensuring participant***  
87 ***safety while collecting additional outcome data and conducting an orderly trial***  
88 ***closeout.***

89  
90  
91 The Systolic Blood Pressure Intervention Trial (SPRINT) is a 2-arm, multicenter,  
92 randomized clinical trial designed to test whether a treatment program aimed at reducing  
93 systolic blood pressure (SBP) to a lower goal than currently recommended will reduce  
94 cardiovascular disease (CVD) risk. About 9250 participants with SBP  $\geq$  130 mm Hg and  
95 at least one additional CVD risk factor will be recruited at approximately 90 clinics within  
96 5 clinical center networks (CCNs) over a 2-year period, and will be followed for 4-6  
97 years. Approximately 4300 participants will have chronic kidney disease (CKD), and  
98 3250 will be aged 75 or older. The primary outcome is the first occurrence of a  
99 myocardial infarction (MI), acute coronary syndrome (ACS), stroke, heart failure (HF), or  
100 CVD death. Secondary outcomes include all-cause mortality, decline in renal function or  
101 development of end stage renal disease (ESRD), dementia, decline in cognitive function,  
102 and small vessel cerebral ischemic disease.

103  
104 **Design**

105  
106 SPRINT will randomize about 9250 participants aged  $\geq$  50 years with SBP  $\geq$ 130 mm Hg  
107 and at least one additional CVD risk factor. The trial will compare the effects of  
108 randomization to a treatment program of an intensive SBP goal with randomization to a  
109 treatment program of a standard goal. Target SBP goals are  $<$ 120 vs  $<$ 140 mm Hg,

110 respectively, to create a minimum mean difference of 10 mm Hg between the two  
111 randomized groups. The primary endpoint is incident CVD events identified over a  
112 follow-up period of up to six years. The primary hypothesis is that CVD event rates will  
113 be lower in the intensive arm. Both the number of randomizations and the length of  
114 follow-up may differ from these targets depending on how observed values of  
115 parameters differ from estimates used to design the study. Secondary hypotheses  
116 include whether the lower SBP goal reduces CVD event rates and progression of renal  
117 disease in people with CKD, whether the lower SBP goal reduces progression of CVD  
118 event rates in people aged 75 or older, the impact of treatment strategy on health-related  
119 quality of life (HRQL), and the relative cost-effectiveness of the two strategies.  
120 Investigation of relevant genetic pathways and other genetic analyses will also be  
121 conducted. The sample size of the trial will be enriched by including 4300 persons with  
122 CKD (estimated GFR 20-59 ml/min/1.73 m<sup>2</sup>) to permit assessment of treatment effect on  
123 CVD in this subgroup, as well as on measures of progression of kidney disease. The  
124 trial will also include 3250 participants who are 75 years old or older. The SPRINT  
125 Memory and cognition IN Decreased hypertension (SPRINT MIND study) will test  
126 whether the lower SBP goal influences the rate of incident dementia and mild cognitive  
127 impairment, global and domain-specific cognitive function, and small vessel ischemic  
128 disease. The sample sizes for each of the three components of the MIND study are  
129 different. Incident dementia will be determined in all participants. The rate of non-  
130 dementia related cognitive decline in important domains of cognition will be measured in  
131 2800 persons representative of all SPRINT participants and from these 2800 persons  
132 the magnetic resonance imaging (MRI) study will involve a sub-set of 640 participants.

133

#### 134 Patient population

135

136 Although epidemiologic evidence strongly suggests that lowering SBP will reduce CVD  
137 risk in nearly all adults, for practical and public health reasons the hypothesis is most  
138 efficiently studied in persons with an elevated risk of CVD. Thus, the trial will recruit  
139 persons 50 years or older with SBP  $\geq$ 130 mm Hg and at least one additional CVD risk  
140 factor. Three groups will be excluded – patients with diabetes, patients with polycystic  
141 kidney disease (PKD), and patients who have had a stroke – because they are the target  
142 groups of completed or ongoing trials that are testing a lower BP goal. SPRINT will  
143 focus on three high risk groups: patients with clinical CVD other than stroke, patients  
144 with chronic kidney disease (estimated glomerular filtration rate [eGFR] 20-59  
145 mL/min/1.73 m<sup>2</sup>), and patients who have a Framingham Risk Score (FRS) of  $\geq$ 15%. A  
146 large subgroup will be participants who are 75 years old or older. This trial is expected  
147 to enroll 50% women and 40% who are members of minority groups (African Americans,  
148 Hispanics, Native Americans, and Asians)

149

#### 150 Sample size and power

151

152 Based on the Antihypertensive and Lipid-Lowering Treatment to Prevent Heart Attack  
153 Trial (ALLHAT) event rates adjusted downward approximately 50% for temporal changes  
154 in CVD risk factors and improved therapy, a sample size of 9250 provides approximately  
155 90% power to detect a 20% effect on the primary composite endpoint of CVD mortality  
156 and non-fatal MI, ACS, stroke, and heart failure. The annual event rate used in this  
157 calculation was 2.2%. Recruitment of a subgroup of 4300 participants with CKD  
158 provides 80% power to detect a 20% effect on the same CVD composite endpoint. The  
159 probable dementia component of the MIND study will provide 80% power to detect a  
160 15% reduction in the incidence of dementia, 2800 SPRINT-MIND participants will

161 provide ample power to detect a 20% reduction in the rate of decline in cognitive function  
162 between the two arms (more intensive vs. less intensive blood pressure control). In  
163 addition, MRI testing to detect differences in small vessel ischemic disease and total  
164 brain volume will provide 80% and 90% power, respectively, between the two strategy  
165 groups in SPRINT.

166  
167 Other secondary outcomes

168  
169 Several additional secondary outcomes will be examined, such as markers of renal  
170 function in non-CKD participants, co-morbidities, quality of life, and cost-effectiveness.  
171 Adverse events (e.g., postural hypotension, including falls) and biochemical changes will  
172 be measured and analyzed by randomized arm.

173  
174  
175  
176  
177

# Chapter 1 – Introduction and Background

## 1. Background

### 1.1 Hypertension, public health and the need for a clinical trial testing a lower SBP target.

Elevated blood pressure (BP) is an important public health concern. It is highly prevalent, the prevalence may be increasing, and it is a risk factor for several adverse health outcomes, especially coronary heart disease, stroke, heart failure, chronic kidney disease, and decline in cognitive function. Given the high prevalence and severity of adverse outcomes, even small improvements in the treatment of elevated BP would result in widespread benefit. The benefit of lowering SBP to around 140 mm Hg is well-accepted, but patients treated to this level of BP are still at increased risk of BP-related adverse outcomes. Observational studies document a progressive increase in risk as BP rises above 115/75 mm Hg. Such epidemiologic evidence suggests there may be substantial benefit to targeting treatment to a SBP <120 mm Hg instead of <140 mm Hg. In contrast, targeting to <120 mm Hg may be harmful or unnecessarily costly and burdensome with limited expectation of benefit. Apart from the Action to Control Cardiovascular Risk in Diabetes (ACCORD) trial, which was restricted to participants with diabetes mellitus, no clinical trial has been conducted to test the hypothesis that more intensive reduction in SBP to <120 mm Hg is beneficial compared to the current recommendation of a goal SBP <140 mm Hg. At present, the results from clinical trials that have addressed related hypotheses are ambiguous. A definitive clinical trial testing whether lowering SBP below 120 mm Hg is better than lowering SBP below 140 mm Hg in non-diabetic hypertensive patients is needed, and this has been designated by an NIH Expert Panel as the most important hypothesis to test regarding the prevention of hypertension-related complications (2007).

#### 1.1.1 Prevalence of hypertension

Approximately 1 billion people worldwide have hypertension (HTN) (Kearney and others, 2005). HTN is highly prevalent in the adult population of the US, especially among those aged  $\geq 60$  years. Two-thirds of those over age 60 have HTN, and the prevalence has increased in recent decades (Chobanian and others, 2003; Cutler and others, 2008; Hajjar and Kotchen, 2003; Ong and others, 2007; World Health Organization, 2002). By age 50 years, isolated systolic hypertension (ISH) is the most common form of HTN, and is associated with greatest risk of target organ damage and adverse health outcomes (Franklin, 1999; Franklin and others, 2001).

#### 1.1.2 Hypertension as a cardiovascular risk factor

The importance of BP, especially SBP, as an independent risk factor for coronary events, stroke, chronic heart failure (CHF), and ESRD is well documented (Vasan and others, 2001; Collins and others, 1990; Macmahon and others, 1990; Sacco and others, 2001; Jackson, 2000; Staessen and others, 1997; Hsu and others, 2005; Chobanian and others, 2003; Gillum, 1991; Prospective Studies Collaboration, 2002; Levy and others, 1996). There is also substantial epidemiologic and clinical trial evidence supporting a role for hypertension therapy in reducing risk for age-related dementia, including vascular dementia and Alzheimer's dementia (Forette and others, 1998; Luchsinger and

228 Mayeux, 2004;Reitz and others, 2007;Skoog and Gustafson, 2003;Skoog and others,  
229 2005;Skoog and Gustafson, 2006;Tzourio and others, 2003). Clinical trial data have  
230 shown reductions in CVD outcomes, including incident stroke (35% to 40%), MI (15% to  
231 25%), and CHF (up to 50%) (Chobanian and others, 2003;Psaty and others, 1997;Neal,  
232 Macmahon, and Chapman, 2000). However, optimal targets for BP lowering are not  
233 established.

234

### 235 **1.1.3 Support for current target**

236

237 In addition to the Seventh Report of the Joint National Committee on Prevention,  
238 Detection, Evaluation, and Treatment of High Blood Pressure (JNC-7) (Chobanian and  
239 others, 2003), most recent practice guidelines recommend a target SBP <140 mm Hg in  
240 persons with established uncomplicated hypertension (Campbell and others,  
241 2009;Mancia and others, 2007;Mancia and others, 2009;National Collaborating Centre  
242 for Chronic Conditions, 2006;National Heart Foundation of Australia (National Blood  
243 Pressure and Vascular Disease Advisory Committee), 2009;Whitworth, 2003). The  
244 benefits of lowering high BP in reducing CV morbidity and mortality are well-established  
245 (Cutler, MacMahon, and Furberg, 1989;Psaty and others, 1997). A meta-analysis  
246 evaluating the treatment efficacy of hypertension therapy in adults over age 60, from  
247 three major trials from different countries (Liu and others, 1998;SHEP, 1991;Staessen  
248 and others, 1997) found that lowering SBP significantly reduced all-cause and CVD  
249 mortality by 17% and 25% respectively, and all CVD end-points by 32% (Staessen and  
250 others, 1999;Staessen, Wang, and Thijs, 2001), though both treatment goals and the  
251 achieved SBP were >140 mm Hg.

252

### 253 **1.1.4 Risk of SBP above normal but below current target**

254

255 The World Health Organization estimates that about two-thirds of the cerebrovascular  
256 disease burden and one-half of the coronary heart disease (CHD) burden on a  
257 worldwide basis is attributable to SBP >115 mm Hg (World Health Organization, 2002).  
258 Further, SBP > 115 mm Hg has been estimated to account for 7.6 million premature  
259 deaths (13.5% of the global total), 92 million disability-adjusted life years (6.0% of the  
260 global total), 54% of stroke, and 47% of ischemic heart disease. About half of this  
261 burden is in persons with a SBP<145 mm Hg (Lawes, Vander, and Rodgers, 2008).  
262 The JNC-7 defined pre-hypertension based on the evidence that SBP values between  
263 120 and 139 mm Hg and diastolic blood pressure (DBP) values between 80 and 89 mm  
264 Hg are associated with increased cardiovascular (CV) risk. Although the risk of a BP  
265 between 120/80 and 139/89 mm Hg is not as pronounced as that associated with a BP  
266 above 140/90 mm Hg (Chobanian and others, 2003), 36% of the adult US population  
267 had a BP within this range in the 2007-2008 National Health and Nutrition Examination  
268 Survey (Wang and Wang, 2004).

269

270 Strong evidence from large population-based longitudinal observational studies indicates  
271 that, regardless of other cardiovascular risk factors, SBP levels of about 115 mm Hg in  
272 adults over the age of 40 years are associated with lower CVD event rates, including  
273 death and slower progression of subclinical CVD (Lewington and others, 2002;Sipahi  
274 and others, 2006) compared to higher SBPs. In the Framingham Heart Study (FHS), the  
275 risk of CVD following 10 years of follow-up among persons with SBP 130-139 mm Hg  
276 and/or DBP 85-89 mm Hg and SBP 120-129 mm Hg and/or diastolic blood pressure  
277 (DBP) 80-84 mm Hg was significantly higher when compared to their counterparts with  
278 SBP <120 mm Hg and DBP <80 mm Hg (Vasan and others, 2001). Experience in the

279 Atherosclerosis Risk in Communities (ARIC) and Women’s Health Initiative (WHI)  
280 studies also showed that individuals with SBP of 120-139 mm Hg and/or DBP of 80-89  
281 mm Hg had an increased risk of CV events, relative to persons with SBP <120 mm Hg  
282 (Hsia and others, 2007;Kshirsagar and others, 2006). A large meta-analysis of data  
283 from 61 population-based longitudinal epidemiological studies showed a strong  
284 continuous graded relationship between SBP and CVD death risk for all age deciles  
285 between 40-89 years, independent of other CVD risk factors, beginning at SBP levels of  
286 about 115 mm Hg (Lewington and others, 2002). For those aged 40-69 years, there was  
287 an approximate doubling in the rates of death from stroke, ischemic heart disease and  
288 other vascular causes with each increase of 20 mm Hg in usual (that is, long-term  
289 average) SBP.

### 291 **1.1.5 Evidence for possible benefit of lower target on CV outcomes**

292  
293 Clinical trial evidence of benefit from achieving SBP levels that approach the current  
294 recommended goal of <140 mm Hg with pharmacologic treatment is strong, but a trial  
295 specifically designed to test lowering the SBP treatment goal below the 140 mm Hg  
296 level, the ACCORD trial, found no clear evidence of benefit. The ACCORD trial tested  
297 the research question of whether a therapeutic strategy aimed at reducing SBP to <120  
298 mm Hg was more effective in reducing CVD events than a strategy aimed at SBP <140  
299 mm Hg in participants who had diabetes and were at increased risk for CVD events.  
300 ACCORD found a non-significant reduction in CV events in the intensively treated group,  
301 though a lower than expected event rate contributed to an inability to exclude a clinically  
302 meaningful effect (The ACCORD Study Group, 2010). The lack of overall benefit was  
303 generally consistent across a variety of subgroups. This is in contrast to prior  
304 experience of improved outcomes with more compared to less intensive BP reduction in  
305 the diabetic participants in the United Kingdom Prospective Diabetes Study (UKPDS)  
306 and in the diabetic subgroups in the Hypertension Optimal Treatment trial (HOT),  
307 Systolic Hypertension in the Elderly Program (SHEP) and Systolic Hypertension in  
308 Europe trial (Syst-Eur). Importantly, none of these trials tested the same level of  
309 intensity of BP reduction or the low BP goal employed in ACCORD. Consistent with  
310 previous trials, ACCORD did find a large reduction in the incidence of stroke in the  
311 intensively treated group, and though the incidence of serious adverse effects was  
312 significantly greater in the intensive treatment group, adverse events occurred with  
313 relatively low frequency overall.

314  
315 Results from overall or subgroup analyses of other CV outcome trials are mixed, with  
316 some providing support for the benefit of a lower BP goal but others not providing such  
317 evidence. In addition, supportive data from other trials have generally been based on  
318 analyses of achieved BP rather than pre-defined treatment goals. For example, the  
319 Hypertension Detection and Follow-up Program (HDFP) showed reductions in mortality  
320 (17%) and CVD mortality (19%) in participants randomized to Stepped Care treatment of  
321 hypertension compared with Referred Care. Participants in the Stepped Care arm  
322 averaged 159 mm Hg at baseline and achieved SBP levels of 130 mm Hg at 4 years and  
323 140 mm Hg at 5 years of follow-up (Abernethy and others, 1986;HDFP, 1979b;HDFP,  
324 1979a;HDFP, 1982). In the Heart Outcomes Prevention Evaluation (HOPE) study, the  
325 use of ramipril in high-risk patients lowered SBP by 3-4 mm Hg from a baseline mean of  
326 139 mm Hg compared to placebo and reduced the composite CVD endpoint that  
327 included CVD death (26%), MI (20%), stroke (32%), revascularization (15%), and CHF  
328 (23%) (Yusuf and others, 2000). In the European Trial on Reduction of Cardiac Events  
329 with Perindopril in Stable Coronary Artery Disease (EUROPA), use of perindopril (vs.



330 placebo) resulted in a 5/2 mm Hg reduction in BP (from a mean baseline value of 137/82  
331 mm Hg) and a 20% reduction in CVD events (Fox, 2003). The perindopril protection  
332 against recurrent stroke study (PROGRESS) showed a significant reduction in stroke  
333 and major vascular events associated with a 9/4 mm Hg reduction in BP from a baseline  
334 mean of 147/86 mm Hg (PROGRESS Collaborative Group, 2001). More importantly, in  
335 a pre-specified subgroup analysis, those receiving 2 drugs (perindopril plus indapamide)  
336 had greater reductions in BP (12/5 mm Hg) and risk (43%) compared with placebo  
337 versus those on perindopril alone compared with placebo (5/3 mm Hg and 5%),  
338 supporting the hypothesis that lower BP is better. There were similar reductions in the  
339 risk of stroke in hypertensive and non-hypertensive subgroups (all  $p < 0.01$ ). Finally, in  
340 the Comparison of Amlodipine vs. Enalapril to limit Occurrences of Thrombosis trial  
341 (CAMELOT), a placebo-controlled trial of patients with heart disease and DBP  $< 100$  mm  
342 Hg (mean 129/78 mm Hg), amlodipine decreased BP by 4.8/2.5 mm Hg and CVD events  
343 by 31% (hazard ratio [HR], 0.69; 95% CI, 0.54-0.88); whereas enalapril lowered BP by  
344 4.9/2.4 mm Hg but did not decrease events (HR, 0.85; 95%CI 0.67-1.07) (Nissen and  
345 others, 2004).

346  
347 Other trials have not supported the hypothesis of benefit from a lower SBP target. In the  
348 HOT study, there were no differences in CVD events between groups randomized to  
349 target DBPs of  $\leq 90$  mm Hg vs  $\leq 85$  mm Hg vs  $\leq 80$  mm Hg in the entire cohort of 18,790  
350 hypertensive participants; the average on-treatment SBP levels were 140 mm Hg and  
351 144 mm Hg, respectively, in the  $\leq 80$  and  $\leq 90$  mm Hg target groups (Hansson and  
352 others, 1998). Only a post hoc analysis of the diabetic subgroup ( $n=1,501$ ) showed that  
353 major CVD events were reduced by 51% ( $p=0.005$ ) in those randomized to the lower BP  
354 goal. The average on-treatment SBP levels were 140 mm Hg and 144 mm Hg in the  
355  $\leq 80$  and  $\leq 90$  mm Hg target groups, respectively (Hansson and others, 1998). Likewise,  
356 there was no special benefit in those with an achieved SBP of 130 mm Hg vs. 134 mm  
357 Hg in the Prevention of Events with Angiotensin Converting Enzyme (PEACE) trial,  
358 which compared trandolapril treatment to placebo in persons with stable coronary artery  
359 disease (Braunwald and others, 2004). In the aggregate, these trials had only modest  
360 net reductions in SBP (4-6 mm Hg), though ACCORD and other trials have shown that a  
361 much larger reduction (14 mm Hg difference in SBP between the two arms) can be  
362 achieved.

363  
364 The ACCORD BP results provide a strong rationale for testing the potential benefits of  
365 intensive BP lowering. (i) The confidence interval around ACCORD's non-significant  
366 effect does not exclude benefit in the range of 20% to 25% reduction in the rate of CV  
367 events. Effects of that magnitude would be of considerable importance to public health.  
368 (ii) Serious adverse effects were significantly more frequent in the intensive treatment  
369 group, but occurred with low frequency overall. (iii) People without diabetes, who are  
370 probably less prone to microvascular disease but were excluded from ACCORD, may  
371 benefit from more intensive BP lowering. (iv) ACCORD excluded people with serum  
372 creatinine levels  $> 1.5$  mg/dL, which are prevalent in the US population and associated  
373 with high CV risk. (v) The glycemia arm of the ACCORD trial was stopped early because  
374 of an excess in total mortality and the possibility of interaction between these two  
375 interventions is still under investigation. The safety and benefit of intensive BP reduction  
376 in patients  $> \text{age } 75$  remain to be tested. Thus, it is imperative that the potential benefits  
377 and harms of intense SBP-lowering be examined definitively in this and other high-risk  
378 populations, e.g. those with chronic kidney disease (CKD) or underlying CVD.  
379

### 1.1.6 Possible harm from treatment of SBP to <120 mm Hg

There are a number of reasons for requiring recommendations to lower SBP treatment goals be based on definitive trial evidence. Treating to lower BP levels with medications could be harmful. For example, one proposed mechanism that has some support in post hoc analyses of clinical trials (Cruickshank and others, 1987; Cruickshank, 2000; Somes, Shorr, and Pahor, 1999), known as the “J-curve” hypothesis, states that lowering DBP too much may decrease coronary artery perfusion and increase the risk of CVD events in patients with coronary artery disease (CAD). In post-hoc observational analyses of clinical trial experience, the level of DBP below which risk increased has varied by trial, sometimes being as high as <85 mm Hg (Cruickshank and others, 1987). In corresponding analyses of SHEP participants, the higher risk was reported with DBP <55-60 mm Hg during treatment (Somes and others, 1999).

Further, if treatment has little or no benefit, adding drugs is a waste of patients’ and payers’ resources and time. For example, in a cost-effectiveness analysis of the HOT trial, which overall did not show a significant benefit for lower DBP goals, the cost-effectiveness ratios, expressed as cost per year of life gained, were most favorable for the DBP ≤90 mm Hg target group (\$4262) and for added aspirin treatment (\$12,710) (HOT, 1998). In the moderately intensive treatment (DBP ≤85 mm Hg) group, the cost-effectiveness ratio escalated to \$86,360; with intensive treatment (DBP ≤80 mm Hg), costs further increased to \$658,370 per year of life gained. Only treatment to a DBP target of 90 mm Hg and co-administering aspirin were considered highly cost effective; intensive BP lowering down to 80 mm Hg was clearly very costly.

A third reason for not recommending lower SBP goals without definitive clinical trial evidence relates to the increased number of drugs required to achieve these goals. For example, in the African American Study of Kidney disease and hypertension (AASK) trial, the intensive BP goal (achieved SBP = 128 mm Hg) group required an average of 3.04 drug classes compared with 2.39 in the conventional BP goal group (Wright, Jr. and others, 2002a) and in the ACCORD BP trial experience >3 drug classes were required for the intensive SBP goal group to achieve a SBP average of 119 mm Hg, compared with 2 classes in the standard SBP goal group with a mean SBP achieved of 134 mm Hg (The ACCORD Study Group, 2010). In addition to being more costly and having greater potential for drug-related adverse events, even 1-2 more medications per day may contribute to reduced adherence to other evidence-based drug treatment (e.g., statins or aspirin). Patients may choose to not take medications without more evidence for safety and benefit. In addition to being more costly, burdensome, and potentially risky, a 20-mm Hg lower SBP goal (and/or a 10 mm Hg lower DBP goal) would likely mean that up to 70-80 million Americans now considered “prehypertensive” may require drug therapy for a condition that has not been proven to be benefited by treatment (Greenlund, Croft, and Mensah, 2004).

Finally, all medications carry an intrinsic risk of side effects which may adversely affect clinical outcomes and quality of life, and lead to drug interactions, especially in older persons who may need to take a variety of medications.

### 1.1.7 Conclusion

If the SPRINT results are positive and support a SBP goal <120 mm Hg, and this is fully applied in practice a large number of major CVD could be prevented each year, in the

431 U.S. alone. If the results are negative and SPRINT is sufficiently powered and well-  
432 conducted, then recommendations for SBP goal in the treatment of most hypertensive  
433 patients, including those with stage 3 CKD and pre-existing CVD, would 1) allow for a  
434 redoubled focus on achieving a SBP goal of <140 mm Hg, and 2) abrogate the need for  
435 the additional effort and cost of achieving a lower SBP goal than currently recommended  
436 for most patients with elevated BP. If none of the major outcomes show harm from  
437 lowering to <120, and if any of the outcomes are positive, SPRINT may make a  
438 substantial contribution to public health.

439

## 440 **1.2 SPRINT's target patient population**

441

442 Although epidemiologic evidence strongly suggests that lowering SBP will reduce CVD  
443 risk in nearly all adults, for practical and public health reasons the hypothesis is most  
444 efficiently studied in high-risk individuals. A high risk population stands to benefit most in  
445 the sense that a greater number of events may be prevented per treated individual.  
446 Furthermore, results in a diverse high risk population will likely generalize to lower risk  
447 populations, at least in terms of relative risk reduction. Thus, the SPRINT trial will recruit  
448 patients 50 years or older with SBP  $\geq 130$  mm Hg who either have or are at high risk for  
449 CVD. SPRINT will focus on three high risk groups: individuals with clinical CVD other  
450 than stroke, individuals with CKD (estimated glomerular filtration rate [eGFR] 20-59  
451 ml/min/1.73 m<sup>2</sup>), and individuals without clinical CVD who have high estimated CVD risk  
452 based on factors such as smoking, low levels of HDL, high levels of LDL or age. Three  
453 other groups will be excluded: patients with diabetes, patients with polycystic kidney  
454 disease (PKD), and patients who have had a stroke. Patients with diabetes have been  
455 studied in the ACCORD trial; patients with prior stroke and PKD are part of other  
456 ongoing trials.

457

### 458 **1.2.1 Chronic Kidney Disease (CKD)**

459

460 An important and under-studied high-risk group for CVD is the population with CKD  
461 (Coca and others, 2006). In the U.S., the number of persons with Stage 3 CKD (eGFR  
462 between 30 and 60 ml/min/1.73 m<sup>2</sup>) has recently been estimated to be 7.7% of the adult  
463 population, or 15.5 million (Coresh and others, 2007). Patients with prevalent CVD have  
464 a high prevalence of CKD, with reported ranges of 30-60% (Keeley and others,  
465 2003;Levey and others, 1998;Shlipak and others, 2002).

466

467 Individuals with CKD are at high risk for CVD events (Shlipak and others, 2009;Go and  
468 others, 2004;Rahman and others, 2006;Weiner and others, 2004;Foster and others,  
469 2007;McCullough and others, 2007;Rashidi and others, 2008;Fried and others, 2009). A  
470 meta-analysis of reported data from prospective studies in Western populations  
471 demonstrated that people with an eGFR of <60 ml/min/1.73m<sup>2</sup> have a relative risk of 1.4  
472 for CVD, compared to those with an eGFR of  $\geq 60$  ml/min/1.73m<sup>2</sup> (Di Angelantonio and  
473 others, 2007). The relative risk increases as eGFR declines (Go and others, 2004).  
474 Pooled data from the ARIC and CHS cohorts demonstrated that participants with CKD  
475 were also at increased risk for stroke (Weiner and others, 2007), and CKD was a risk  
476 factor for CVD and all-cause mortality independent of traditional CVD risk factors  
477 (Weiner and others, 2004). In ALLHAT, despite exclusion criteria designed to exclude  
478 participants with significant GFR impairment, about 18% of participants had an eGFR  
479 30-60 ml/min/1.73m<sup>2</sup>. In that CKD subgroup, CHD was 38% higher and combined CVD  
480 35% higher than in those with an eGFR >90 ml/min/1.73m<sup>2</sup> (Rahman and others, 2006).

481 The effect of BP control on the development of CVD in the CKD population is far less  
482 clear (Berl and others, 2005).

483 A strategy of treating to a lower BP goal may reduce the progression of kidney disease.  
484 The risk of CKD increases progressively beginning with pre-HTN levels of BP through  
485 the various stages of HTN (Haroun and others, 2003). Several observational studies  
486 have suggested that achievement of lower BP is associated with lower risk of adverse  
487 kidney outcomes (Bakris and others, 2000;Klag and others, 1996;Schaeffner and others,  
488 2008). However, two randomized clinical trials, AASK and the Modification of Diet in  
489 Renal Disease Study (MDRD) that examined lower-than-usual BP goals failed to show  
490 an overall significant beneficial long-term effect of lower BP on decline in kidney function  
491 (Klahr and others, 1994;Wright, Jr. and others, 2002b) Both studies enrolled participants  
492 with non-diabetic CKD and randomized them to a mean arterial pressure (MAP) goal of  
493 <92 mm Hg (corresponding to <125/75 mm Hg) or a MAP goal of <107 mm Hg  
494 (corresponding to <140/90 mm Hg). The AASK trial compared two BP goals based on  
495 MAP (102-107 vs. <92 mm Hg) in 1094 African Americans with hypertensive kidney  
496 disease; the achieved difference of 128/78 vs. 141/85 did not reduce the progression of  
497 CKD (Wright, Jr. and others, 2002b). However, subgroup analyses of long-term (up to  
498 10 years) post trial follow-up suggested the possibility of benefit in participants with  
499 baseline urinary protein excretion equivalent to >300 mg/day who were randomized to  
500 the lower goal (Appel and others, 2008). Among 585 non-diabetic participants with  
501 Stage 3/4 CKD in MDRD, 24% had PKD and only 53 were African American (Klahr and  
502 others, 1994). Mean baseline proteinuria was 2.2 g/d, and a beneficial effect of the  
503 lower BP goal on GFR was observed in the subgroup with urinary protein > 1 g/d  
504 (Peterson and others, 1995;Sarnak and others, 2005). In addition to the inherent  
505 problems associated with subgroup analysis, major caveats of these results from the  
506 MDRD Study were that the number of patients in the heavy proteinuric subgroups was  
507 small and the results were confounded by the use of angiotensin converting enzyme  
508 (ACE) inhibitors. Together, these studies fail to show convincing renoprotective effects  
509 for the lower BP goal; however their results have led to clinical recommendations that  
510 patients with high levels of proteinuria should have blood pressure goals below 140/90  
511 mm Hg. They were not adequately powered to consider CVD outcomes. Nonetheless,  
512 they successfully demonstrated the feasibility of achieving significant separation in BP in  
513 large cohorts with advanced CKD. Given the rapid increase in the prevalence of CKD,  
514 the effects of aggressively lowering BP on the risks of CVD and CKD progression need  
515 to be clarified in a sample that appropriately mirrors the U.S. population with CKD  
516 (Sarnak and others, 2003).

517

### 518 **1.2.2 SENIOR participants and SPRINT-MIND**

519

520 Including a large subgroup of participants aged 75+ will provide data on whether  
521 intensive BP treatment will reduce CVD and renal events in the elderly. Both the  
522 Treatment of Hypertension in Patients over 80 Years of Age (HYVET) (Beckett and  
523 others, 2008) and the SHEP (SHEP, 1991) trials found that a SBP delta of 15 and 11  
524 mm Hg, respectively, between treated and placebo groups resulted in >30% reduction in  
525 stroke, HF, and overall CVD events in the treated groups. Unlike HYVET and SHEP,  
526 which had SBP levels of about 150 and 143 mm Hg at the end of the trials, SPRINT will  
527 have a substantially lower SBP target of <120 mm Hg in the intensive treatment group, a  
528 goal which has never been tested in the elderly. No previous large scale trial has  
529 examined the impact of treating SBP in the elderly to <120 mm Hg versus <140 mm Hg.

530

531 Importantly, the elderly pose an additional question as to the safety of intensive SBP  
532 lowering in a population with known wider pulse pressures and a risk of excessively low  
533 DBP with intensive SBP treatment. In addition to concerns about hypotension, syncope,  
534 and falls, there may be a point of maximal benefit beyond which lowering BP could be  
535 detrimental in the elderly. This is a specific concern related to very low DBP, which  
536 could compromise coronary blood flow. The SPRINT-Senior cohort will allow us to more  
537 precisely assess the safety of the lower SBP goal.

538  
539 The SPRINT Senior cohort also provides a critically important the main body of  
540 participants for SPRINT-MIND. Dementia is a leading cause of placement into nursing  
541 homes and assisted living facilities (guero-Torres and others, 2001;Guralnik and others,  
542 1997;Magsi and Malloy, 2005;National Institute on Aging, 2000). Dementia affects 24  
543 million individuals globally and 4.5 million persons in the US, a number that is expected  
544 to double by 2040 (Ferri and others, 2005;Plassman and others, 2007). Both dementia  
545 and a precursor, mild cognitive impairment (MCI), are highly prevalent among adults  
546 over age 70, with estimates running between 15-20% and 40-50% respectively in  
547 persons over age 80. In addition, there is evidence that MCI is also highly prevalent in  
548 persons above age 60 with CKD. Notably, approximately 15% of persons with MCI  
549 progress to dementia each year (Petersen, 2000), accruing substantial negative societal  
550 impact, and threatening the quality of life of its victims, their families and other  
551 caregivers. Proven strategies for prevention and delay of cognitive decline and  
552 dementia are lacking, and there is a clear need for clinical trials testing promising  
553 preventive interventions. Even a moderately effective strategy could have tremendous  
554 benefits, with a 5-year delay in onset of dementia estimated to decrease the number of  
555 cases of incident dementia by about 50% after several decades (Brookmeyer and  
556 others, 2002).

557  
558 Cognitive impairment can have multiple etiologies and vascular risk factors are  
559 implicated in a large proportion of dementias including neurodegenerative dementias like  
560 Alzheimer's type (Qiu, Winblad, and Fratiglioni, 2005c). With this strong link to CVD risk  
561 plus several observational studies suggesting that the ideal SBP to lower CVD risk may  
562 be below 120 mm Hg (Chobanian and others, 2003) it is possible that targeting intensive  
563 blood pressure control intensive blood pressure control may have substantial  
564 implications for preserving brain function.

565  
566 Substantial epidemiologic evidence identifies hypertension as a risk factor for dementia.  
567 Longitudinal observational studies have yielded mixed results, depending on the age at  
568 which blood pressure is measured, the impact and duration of treatment, duration of  
569 hypertension, and level of BP control (Birns and others, 2006;Qiu, Winblad, and  
570 Fratiglioni, 2005). Midlife hypertension appears to increase the risk of all-cause  
571 dementia in large prospective cohort studies (Freitag and others, 2006;Kivipelto and  
572 others, 2001b). However, lower SBP in older adults has been associated with  
573 subsequent development of dementia (Nilsson and others, 2007). Clinical trials of  
574 antihypertensive treatment have also provided conflicting experience regarding the  
575 impact of treatment of hypertension on the risk of cognitive impairment and dementia in  
576 older people (Guo and others, 1999; Hajjar and others, 2005; Veld and others, 2001).  
577 Four large randomized, placebo-controlled studies have investigated the effects of  
578 antihypertensive agents on the incidence of dementia. The Syst-Eur (Staessen and  
579 others, 1997) and the Perindopril Protection Against Recurrent Stroke Study  
580 (PROGRESS) studies (Tzourio and others, 2003) found that more aggressive  
581 antihypertensive treatment reduced the rate of small vessel ischemic disease (also the

582 primary outcome of SPRINT MIND MRI), a risk factor for dementia (Dufouil and others,  
583 2009), as well as reducing dementia incidence by 50% compared to placebo. In contrast,  
584 the Study on Cognition and Prognosis in the Elderly (SCOPE) and SHEP trials (SHEP,  
585 1991) found no significant difference in incidence of dementia between the active  
586 treatment and placebo groups, although differential missing data for the placebo vs.  
587 treatment groups may explain the SHEP findings (Di Bari and others, 2001). More  
588 recently, the HYVET-COG, a BP lowering trial in people age  $\geq 80$ , was powered to detect  
589 a 33% reduction in adjudicated incident dementia (Peters 2008). The trial was stopped  
590 prior to its planned date of completion due to significant reductions in stroke and all-  
591 cause mortality in the intervention group. It yielded a 14% non-significant reduction in  
592 incident dementia. One reason for the non-significant result was a loss of power due to  
593 the unexpectedly early conclusion of follow-up, resulting in a relatively short, two-year  
594 period of follow-up. One possible explanation for the ambiguous relationships described  
595 between hypertension, hypertension treatment and preservation of cognitive function is  
596 that the cognitive measures included in most of these trials have not been sensitive  
597 enough to detect early, but clinically important, cognitive changes in a cohort with intact  
598 general cognitive function at baseline. Studies using more sensitive neuropsychological  
599 tests, such as the testing proposed for SPRINT-MIND, have shown the strongest  
600 relationships (Elias and others, 1993;Kivipelto and others, 2001a;Kivipelto and others,  
601 2001c;Knopman and others, 2001).

602

603 Hypertension is the primary risk factor for small vessel ischemic disease and cortical  
604 white matter abnormalities (Basile and others, 2006;Kuller and others, 2010;Liao and  
605 others, 1996;Longstreth, Jr. and others, 1996). Chronic kidney disease is also  
606 associated with white matter abnormalities (Ikram and others, 2008), thus the SPRINT  
607 population is at high risk for significant white matter changes. Longitudinal studies  
608 document that hypertension-associated white matter abnormalities are an independent  
609 risk factor for cognitive decline and dementia (Verdelho and others, 2007;Vermeer and  
610 others, 2003), lower extremity functional abnormalities (Rosano and others, 2005), and  
611 clinical stroke (Debette and others, 2010). However, there is limited evidence that better  
612 control of BP slows the progression of white matter lesions in the brain (Dufouil and  
613 others, 2005). Recently reported results from the Women's Health Initiative Memory  
614 Study (WHIMS) indicate that white matter volume (detected by MRI) is associated with  
615 baseline BP, even after adjustment for treatment, other CVD risk factors, and age (Coker  
616 L.H. and others, 2008). Although the beneficial effects of treating hypertension on CVD,  
617 such as stroke have been shown (Collins and others, 1990), it is not known whether  
618 intensive lowering of SBP as proposed in SPRINT will provide reduction in the risk for  
619 developing white matter disease and brain volume loss.

620

## 621 SUMMARY

622

623 Higher than optimal BP is the leading cause of disability adjusted life-years lost on a  
624 global basis, and more intensive control of SBP than is currently recommended may  
625 contribute to reductions in stroke, heart failure, coronary heart disease, chronic kidney  
626 disease, and dementia. This potential benefit must be weighed against potential risks,  
627 including complications resulting from low coronary, cerebral, and renal perfusion  
628 pressure and the medications themselves. Definitive evidence from a well designed and  
629 conducted trial should form the foundation for pertinent recommendations and  
630 healthcare policies.

631

632

633

## Chapter 2 – Overview of Trial Design

The SPRINT randomized controlled clinical trial will examine the effect of a high BP treatment strategy aimed at reducing SBP to a lower goal than is currently recommended. The primary objective is to determine whether randomization to this intensive strategy is more effective than a standard strategy in reducing the incidence of serious cardiovascular disease events. Other important study objectives are to assess the impact of more intensive SBP reduction on renal function, incidence of probable dementia, quality of life, cost-effectiveness, cognitive function and small vessel ischemic disease.

The study cohort will include approximately 9250 people aged  $\geq 50$  years with SBP  $\geq 130$  mm Hg. SPRINT will focus on three high risk groups: patients with clinical CVD other than stroke, patients with chronic kidney disease (estimated glomerular filtration rate (eGFR) 20 -59 mL/min/1.73 m<sup>2</sup>), and patients who have a Framingham Risk Score (FRS) of  $\geq 15\%$ . Participants will be recruited over a 2-year period at approximately 80 to 100 clinics in 5 clinical center networks (CCNs) and will be followed for up to 6 years. Both the number of randomizations and the length of follow-up may differ from these targets depending on how observed values of parameters differ from estimates used to design the study. Approximately 4300 SPRINT participants will have CKD, and 3250 will be age 75 or older. Chapter 3 presents the eligibility criteria for the trial.

Participants will be stratified by clinic and randomly assigned to either the intensive or standard SBP lowering strategy. Chapter 4 and 5 provides a general description of the intervention.

The primary outcome will be a composite end-point consisting of the first occurrence of a myocardial infarction (MI, by electrocardiogram (ECG) or hospitalization), stroke, heart failure, non-MI acute coronary syndrome, or CVD death. Study outcomes are described in Chapters 6, 7 and 9.

The sample size for SPRINT is estimated to provide 90% power to detect a 20% relative decrease in the rate of the composite primary outcome in participants randomized to the more intensive SBP lowering strategy. Sample size estimation is described further in Chapter 10.

The major objectives of the SPRINT trial are as follows:

### 2.1 Primary Hypothesis

In people aged  $\geq 50$  years with SBP  $\geq 130$  mm Hg and either a history of CVD, eGFR between 20 and 59, or a Framingham Risk Score (FRS) indicating 10-year CVD risk of  $\geq 15\%$ , does a therapeutic strategy that targets a SBP of  $< 120$  mm Hg reduce the rate of CVD events compared to a strategy that targets a SBP of  $< 140$  mm Hg? This hypothesis will be tested using a composite outcome including

- cardiovascular death,
- myocardial infarction,
- stroke,
- heart failure, and
- non-MI acute coronary syndrome

684 ascertained over a follow-up period of up to 6 years. Interim monitoring for overall trial  
685 efficacy will be based on the accrued rate of this primary outcome. The anticipated event  
686 rate for this outcome is 2.2%/year.

687

## 688 **2.2 Subgroup Hypotheses**

689

690 SPRINT will examine intervention effects in a number of subgroups; these are presented  
691 in greater detail in Chapter 10. Two subgroups are of particular interest due their  
692 connection to possible biological mechanisms affecting the primary outcome:

693

- 694 1. participants with and without CKD (eGFR <60 ml/min/1.73m<sup>2</sup>) at baseline,
- 695 2. participants < or ≥ 75 years at baseline.

696

697 Consistency of the effects for the intervention on the primary outcome will also be  
698 examined in subgroups defined by gender, race/ethnicity (black vs. non-black), presence  
699 of clinical CVD at baseline (i.e., primary and secondary prevention participants) and  
700 tertiles of baseline systolic BP.

701

702 Subgroup analyses for secondary outcomes are described in Chapter 10.

703

## 704 **2.3 Secondary Hypotheses**

705

706 SPRINT prespecifies two types of secondary hypotheses. The first type will address  
707 secondary outcomes in analyses designed to support and confirm the primary analysis.  
708 These will include components of the primary composite outcome, total mortality, and a  
709 composite of the primary composite with total mortality (CVD-free survival). The other  
710 type addresses two areas of non-cardiovascular clinical effects: renal and cognitive  
711 outcomes.

712

### 713 **2.3.1 Objectives for renal outcomes and the CKD subgroup**

714

- 715 1. For the CKD subgroup, we will determine whether the intensive intervention arm  
716 experiences a lower rate of a composite of renal outcomes composed of:

717

- 717 • ESRD or
- 718 • A 50% decline from baseline eGFR

719

- 720 2. For the non-CKD subgroup, we will determine whether the intensive intervention arm  
721 experiences a lower rate of progression to CKD, defined as

722

- 722 • ESRD or
- 723 • 30% decrease from baseline eGFR and an end value of <60 ml/min/1.73M<sup>2</sup>

724

### 725 **2.3.2 SPRINT MIND Hypotheses**

726

- 727 1. All-cause Dementia. The incidence of all-cause dementia will be lower in SPRINT  
728 participants assigned to the intensive SBP treatment arm compared to their  
729 counterparts assigned to the standard SBP treatment arm.

730

- 731 2. Cognitive Decline. The combined rate of decline in all domains of cognition will be  
732 slower in the intensive SBP treatment arm compared to the standard SBP treatment



733 arm. This hypothesis will be tested in a randomly selected subset of 2800  
734 participants enrolled in SPRINT.

735

736 3. MRI Brain Changes. The volume small vessel ischemic disease (SVI) will be lower  
737 in SPRINT participants assigned to the intensive SBP treatment arm compared to  
738 their counterparts assigned to the standard SBP treatment arm. A sub-hypothesis is  
739 that total brain volume will also be greater (thus less atrophy) in the intensively  
740 treated group. The MRI sub-study will be conducted in 640 participants chosen from  
741 the 2800 selected to receive regular extensive cognitive assessment.

742

743

744

745

## Chapter 3 – Participant Selection

### 3.1 Eligibility Criteria

The objective of setting inclusion/exclusion criteria is to identify a trial population that will ensure adequate event rates for statistical power, provide maximum generalizability, and maximize safety. Inclusion/exclusion criteria were made as simple as possible to ensure standard implementation across all SPRINT study sites. Specifically, the SPRINT eligibility criteria were developed to facilitate the identification and inclusion of a trial population at high risk for the major trial endpoints, including CVD, CKD, cognitive decline, and dementia. Hence, the trial population is comprised of individuals in three major classes: those with existing CVD, existing CKD, or an elevated estimated risk for CVD disease based on age and other risk factors.

Implementation of these inclusion and exclusion criteria and related recruitment strategies will be accomplished to meet several goals with respect to composition of the study population. The overall goal for recruitment is 9,250 participants, although the final number of randomizations may be between 8,500 and 10,000. For the target of 9,250 participants, we will strive to include approximately 4300 (46%) with chronic kidney disease (eGFR 20 -59 ml/min/1.73m<sup>2</sup>), expected to be divided approximately evenly below and above 45 ml/min/1.73m<sup>2</sup>, and approximately 3250 (35%) who are at least 75 years old. In addition, we will strive to include 50% women, 40% minorities, and 40% with clinical or subclinical cardiovascular disease. Among these goals there is an implicit hierarchy based on study hypotheses and design considerations: first, attain the overall sample size, to preserve power for the main hypothesis of SPRINT; second, reach the required sample sizes for formal sub-group hypotheses among participants with CKD and among seniors; and third, ensure a sufficiently diverse study population so that results are broadly applicable to the affected U.S. population. We will monitor these goals on an ongoing basis and the Recruitment, Retention, and Adherence Subcommittee and the Steering Committee will evaluate recruitment strategies and implement corrective actions.

#### a) Inclusion Criteria

1. At least 50 years old
2. Systolic blood pressure
  - SBP: 130 – 180 mm Hg on 0 or 1 medication
  - SBP: 130 – 170 mm Hg on up to 2 medications
  - SBP: 130 – 160 mm Hg on up to 3 medications
  - SBP: 130 – 150 mm Hg on up to 4 medications
3. There are no diastolic blood pressure (DBP) inclusion criteria, since risk is more related to SBP than DBP in the age and risk population anticipated for SPRINT. If a screenee is otherwise eligible for SPRINT but presents with a treated BP and/or number of medications that fall outside the SPRINT inclusion criteria, BP-lowering medications may be adjusted prior to the randomization visit to determine whether, with such adjustments, the screenee will meet eligibility criteria for SPRINT. A screenee who presents on no BP medications should have documentation of SBP

795 ≥130 mm Hg on 2 visits within 3 months prior to the randomization visit in order to be  
796 eligible for the trial.

797

798 4. Risk (one or more of the following):

799 a) Presence of clinical\* or subclinical\*\* cardiovascular disease other than stroke

800 b) CKD, defined as eGFR  $\geq 20 - 59$  ml/min/1.73m<sup>2</sup> based on the 4-variable  
801 Modification of Diet in Renal Disease (MDRD) equation and latest lab value,  
802 within the past 6 months. (If the serum creatinine is unstable within the last 6  
803 months, enrollment into SPRINT could be delayed until the serum creatinine  
804 has been stabilized and the eGFR is still within the allowed range.)

805 c) Framingham Risk Score for 10-year CVD risk  $\geq 15\%$  based on laboratory  
806 work done within the past 12 months for lipids

807 d) Age  $\geq 75$  years.

808

809 5. Clinical CVD (other than stroke)

810 a) Previous myocardial infarction (MI), percutaneous coronary intervention  
811 (PCI), coronary artery bypass grafting (CABG), carotid endarterectomy  
812 (CE), carotid stenting

813 b) Peripheral artery disease (PAD) with revascularization

814 c) Acute coronary syndrome with or without resting ECG change, ECG  
815 changes on a graded exercise test (GXT), or positive cardiac imaging  
816 study

817 d) At least a 50% diameter stenosis of a coronary, carotid, or lower extremity  
818 artery

819 e) Abdominal aortic aneurysm (AAA)  $\geq 5$  cm with or without repair

820

821 6. Subclinical CVD

822 a) Coronary artery calcium score  $\geq 400$  Agatston units within the past 2  
823 years.

824 b) Ankle brachial index (ABI)  $\leq 0.90$  within the past 2 years.

825 c) Left ventricular hypertrophy (LVH) by ECG (based on computer reading),  
826 echocardiogram report, or other cardiac imaging procedure report within  
827 the past 2 years.

828

## 829 **b) Exclusion Criteria**

830

831 1. An indication for a specific BP lowering medication (e.g., beta-blocker following  
832 acute myocardial infarction) that the person is not taking and the person has not  
833 been documented to be intolerant of the medication class. (If a screenee has a non-  
834 hypertension indication for a BP-lowering medication (e.g., beta-blocker post-MI,  
835 renin angiotensin system (RAS) blocker for CVD prevention, or alpha blocker for  
836 benign prostatic hypertrophy (BPH)), the screenee should be on the appropriate  
837 dose of such medication before assessing whether he/she meets the SPRINT  
838 inclusion criteria. If the investigator believes that a potential participant has such an  
839 indication but is not receiving appropriate treatment, he/she should encourage the  
840 potential participant's primary care provider to consider placing the patient on the  
841 appropriate therapy prior to proceeding with the screening process.)

842 2. Known secondary cause of hypertension that causes concern regarding safety of  
843 the protocol.

844 3. One minute standing SBP  $< 110$  mm Hg. Not applicable if unable to stand due to  
845 wheelchair use.

- 846 4. Proteinuria in the following ranges (based on a measurement within the past 6  
847 months)
- 848 (a) 24 hour urinary protein excretion  $\geq 1$  g/day, or  
849 (b) If measurement (a) is not available, then 24 hour urinary albumin excretion  $\geq$   
850 600 mg/day, or  
851 (c) If measurements (a) or (b) are not available, then spot urine protein/creatinine  
852 ratio  $\geq 1$  g/g creatinine, or  
853 (d) If measurements (a), (b), or (c) are not available, then spot urine  
854 albumin/creatinine ratio  $\geq 600$  mg/g creatinine, or  
855 (e) If measurements (a), (b), (c), or (d) are not available, then urine dipstick  $\geq 2+$   
856 protein
- 857 5. Arm circumference too large or small to allow accurate blood pressure  
858 measurement with available devices
- 859 6. Diabetes mellitus. Participants taking medications for diabetes at any time in the  
860 last 12 months are excluded. Participants are also excluded if there is  
861 documentation of: FPG at or above 126 mg/dL, A1C  $\geq 6.5$  percent, a two-hour value  
862 in an OGTT (2-h PG) at or above 200 mg/dL or a random plasma glucose  
863 concentration  $\geq 200$  mg/dL. The diagnosis of diabetes must be confirmed on a  
864 subsequent day by repeat measurement, repeating the same test for confirmation.  
865 However, if two different tests (e.g., FPG and A1C) are available and are  
866 concordant for the diagnosis of diabetes, additional testing is not needed. If two  
867 different tests are discordant, the test that is diagnostic of diabetes should be  
868 repeated to confirm the diagnosis.
- 869 7. History of stroke (not CE or stenting)
- 870 8. Diagnosis of polycystic kidney disease
- 871 9. Glomerulonephritis treated with or likely to be treated with immunosuppressive  
872 therapy
- 873 10. eGFR  $< 20$  ml/min /1.73m<sup>2</sup> or end-stage renal disease (ESRD)
- 874 11. Cardiovascular event or procedure (as defined above as clinical CVD for study  
875 entry) or hospitalization for unstable angina within last 3 months
- 876 12. Symptomatic heart failure within the past 6 months or left ventricular ejection  
877 fraction (by any method)  $< 35\%$
- 878 13. A medical condition likely to limit survival to less than 3 years, or a cancer  
879 diagnosed and treated within the past two years that, in the judgment of clinical  
880 study staff, would compromise a participant's ability to comply with the protocol and  
881 complete the trial. Exceptions to the exclusion for diagnosed cancer would include,  
882 for example, non-melanoma skin cancer, early-stage prostate cancer, localized  
883 breast cancer.
- 884 14. Any factors judged by the clinic team to be likely to limit adherence to interventions.  
885 For example,
- 886 (a) Active alcohol or substance abuse within the last 12 months  
887 (b) Plans to move outside the clinic catchment area in the next 2 years without  
888 the ability to transfer to another SPRINT site, or plans to be out of the study  
889 area for more than 3 months in the year following enrollment.  
890 (c) Significant history of poor compliance with medications or attendance at clinic  
891 visits  
892 (d) Significant concerns about participation in the study from spouse, significant  
893 other, or family members  
894 (e) Lack of support from primary health care provider

- 895 (f) Residence too far from the study clinic site such that transportation is a  
896 barrier including persons who require transportation assistance provided by  
897 the SPRINT clinic funds for screening or randomization visits  
898 (g) Residence in a nursing home. Persons residing in an assisted living or  
899 retirement community are eligible if they meet the other criteria.  
900 (h) Clinical diagnosis of dementia, treatment with medications for dementia, or in  
901 the judgment of the clinician cognitively unable to follow the protocol  
902 (i) Other medical, psychiatric, or behavioral factors that in the judgment of the  
903 Principal Investigator may interfere with study participation or the ability to  
904 follow the intervention protocol  
905 15. Failure to obtain informed consent from participant  
906 16. Currently participating in another clinical trial (intervention study). Note: Patient must  
907 wait until the completion of his/her activities or the completion of the other trial  
908 before being screened for SPRINT.  
909 17. Living in the same household as an already randomized SPRINT participant  
910 18. Any organ transplant  
911 19. Unintentional weight loss > 10% in last 6 months  
912 20. Pregnancy, currently trying to become pregnant, or of child-bearing potential and  
913 not using birth control

914

### 915 **c) Additional Criteria**

#### 916 I. SENIOR

917

918 Whereas there are no eligibility criteria specific to the SENIOR subgroup other than age,  
919 the general eligibility criteria were influenced by consideration of factors of importance to  
920 the inclusion of older participants in SPRINT, including cognitive status, orthostasis,  
921 transportation, and site of residence (e.g., nursing home). The goal is to assemble a  
922 representative population of older patients for whom intensive BP lowering is reasonable  
923 to consider from a medical perspective. This goal is motivated by the perspective that  
924 there may be some older persons with advanced frailty and/or multiple comorbid  
925 conditions whose health is so poor that it would not be reasonable to attempt to treat  
926 SBP as intensively as needed to control SBP to less than 120 mm Hg.

927

#### 928 II. Participants with CKD

929

930 For the purposes of SPRINT, qualifying CKD is defined by eGFR, determined during the  
931 6 months prior to randomization, between 20 and 59 ml/min/1.73m<sup>2</sup>, inclusive, based on  
932 the 4-variable MDRD equation. Patients with significant proteinuria, defined as a 24-  
933 hour urine protein excretion exceeding 1 gram, or rough equivalents thereof (see  
934 Exclusion Criterion 4 above), will be excluded from SPRINT based on evidence from  
935 previous trials suggesting that intensive BP lowering therapy may be beneficial with  
936 respect to slowing the progression of CKD. The vast majority of participants with CKD  
937 so defined will likely be at high risk for CVD. An estimated 82.3% of those who qualify  
938 with eGFR between 45 and 59 ml/min/1.73m<sup>2</sup> will have a Framingham Risk Score for  
939 CVD exceeding 15% over 10 years, and an estimated 71.2% have a Framingham Risk  
940 Score for CVD exceeding 20% over 10 years; hence, these participants will contribute  
941 substantially to the overall event rate and provide the basis for informative subgroup  
942 analyses.

943

944

945

946 III. MIND

947

948 Dementia Screening - All individuals will receive dementia screening at baseline and  
 949 every 2 years following baseline. Individuals who have been previously diagnosed with  
 950 dementia by their physicians are excluded from SPRINT and SPRINT MIND.

951

952 Comprehensive Cognitive Assessment substudy – A subset of 2800 participants  
 953 enrolled in SPRINT will also be assigned to undergo more extensive cognitive  
 954 assessment to evaluate the impact of the intervention on decline in overall and domain-  
 955 specific cognitive function that does not meet criteria for dementia. With limited  
 956 exceptions, all clinics will enroll participants into this 2800 subset, and this subgroup is  
 957 expected to be representative of all randomized participants, including the important  
 958 CKD and SENIOR participants.

959

960 IV. MIND MRI

961

962 Individuals who enroll in the Comprehensive Cognitive Assessment substudy at a clinic  
 963 within sufficient proximity to a SPRINT MIND MRI center, generally defined as within a 2  
 964 to 3 hour driving radius, are eligible to enroll in the MIND MRI Study. The MIND MRI  
 965 Study will have a recruitment goal of approximately 640 participants. Standard safety-  
 966 related exclusions pertaining to the ability to have a magnetic resonance imaging  
 967 procedure performed will be applied.

968

969 **Recruitment and risk implications of inclusion and exclusion criteria**

970

971 As shown in Table 3.1, according to analyses of the National Health and Nutrition  
 972 Examination Survey (NHANES) data for 1999-2004, approximately 6% of the US  
 973 population meets the basic eligibility criteria related to age and SBP, and are free of  
 974 diabetes and previous stroke. Among that group, approximately 70% meet the risk  
 975 criteria described above. The vast majority of these individuals have an estimated 10-  
 976 year risk of CVD exceeding 20% and the population average 10-year risk for CVD is  
 977 approximately 28%. (Note that the use of the FRS in this manner likely underestimates  
 978 the risk of those individuals with existing CHD and stage 3 CKD.) This analysis provides  
 979 evidence that the recruitment pool will be large enough to enable us to recruit  
 980 successfully and to generalize our ultimate results to a reasonably large proportion of the  
 981 US population.

982

983 Table 3.1. Distribution of 10-year risk of CVD in NHANES participants who met basic  
 984 SPRINT eligibility criteria

| Criteria                                     | % of US Population meeting basic eligibility criteria (age, SBP, no DM or stroke) | % of those meeting basic eligibility requirements who meet risk criteria | 10-year CVD Risk Distribution (%) |        |        |      | Mean 10-yr CVD risk (%) |
|----------------------------------------------|-----------------------------------------------------------------------------------|--------------------------------------------------------------------------|-----------------------------------|--------|--------|------|-------------------------|
|                                              |                                                                                   |                                                                          | 5-10%                             | 10-15% | 15-20% | 20+% |                         |
| CHD or Stage 3 CKD or FR <sub>&gt;</sub> 15% | 6.7                                                                               | 70.3                                                                     | 1.3                               | 3.2    | 24.3   | 71.1 | 28.6                    |

985

986 In additional analyses of the NHANES potentially eligible pool, 16.3% had stage 3 CKD  
 987 (3.6% had eGFR < 45ml/min/1.73m<sup>2</sup>), 15.6% had a history of CVD, 34.6% were 75  
 988 years old or older, 8.1% were African Americans, and 49.8% were women. Stage 3a

989 CKD, defined as eGFR 45-59 ml/min/1.73m<sup>2</sup>, but a urine albumin-to-creatinine (ACR) ≤  
 990 10 mg/g, comprised 6.1% of the eligible pool. These analyses, shown in Table 3.2,  
 991 provide evidence to support our recruitment targets for participants with CKD, in the  
 992 SENIOR population, minorities and women.

993

994 Table 3.2. Characteristics of SPRINT eligible sample based on NHANES data.  
 995 Eligibility requirements include age ≥ 50, SBP ≥ 130, eGFR > 20, ACR < 600 mg/g and no  
 996 history of stroke or diabetes.

| Characteristic                              | Proportion (%) |
|---------------------------------------------|----------------|
| % Prior CVD                                 | 15.6           |
| % CKD                                       | 16.3           |
| % Stage 3b CKD                              | 3.6            |
| % Stage 3a + ACR > 10 mg/g                  | 6.6            |
| % Stage 3a + ACR ≤ 10 mg/g                  | 6.1            |
| % Senior (age ≥ 75)                         | 34.6           |
| % Female                                    | 49.8           |
| % Black                                     | 8.1            |
| % Hispanic                                  | 7.4            |
| % SBP 130-139 on no BP lowering medications | 15.2           |
| % with FRS < 15% per 10 yrs                 | 4.5            |

997

### 998 **3.2 Recruitment: Informed Consent, Screening, Baseline**

999

#### 1000 **Recruitment**

1001 The SPRINT recruitment goals are described above. Specific community resources will be  
 1002 used to target women and minority/under-served populations to ensure adequate  
 1003 representation of these groups in SPRINT. Recruitment strategies that have worked well in  
 1004 other trials related to hypertension and CKD will be used. Centralized training for CCN and  
 1005 Clinical Site staffs regarding recruitment issues will be provided before recruitment begins.

1006

1007 The goal of participant recruitment is to create a trial population that will ensure  
 1008 adequate event rates for statistical power while maximizing participant safety and  
 1009 generalizability to the population for which the intervention is intended. A multifaceted  
 1010 approach to screening and enrollment is essential to achieve the recruitment goal. For  
 1011 this multicenter trial, recruitment strategies targeting both existing populations within the  
 1012 clinical practice of the research sites as well as individuals from outside these practice  
 1013 settings will be used to identify potentially eligible participants.

1014

1015 The Recruitment, Retention and Adherence Subcommittee will play a significant role in  
 1016 monitoring the progress of study-wide recruitment and provide a forum for advising the  
 1017 CCNs and clinical sites on problem identification, goal setting, strategy deployment and  
 1018 evaluation in their efforts to achieve site and study-wide recruitment goals. This may  
 1019 include guidance for enhancing the recruitment of ethnic groups, women and the elderly.  
 1020 The Subcommittee will also contribute to the development of the recruitment tools  
 1021 including culture-, gender- and age-specific materials to promote enrollment among  
 1022 these important subgroups.

1023

1024

1025 **3.2.1 Regulatory and Ethical Considerations, including the Informed Consent**  
1026 **Process**

1027 The study will be conducted in accordance with Good Clinical Practice (GCP), all  
1028 applicable subject privacy requirements, and the guiding principles of Helsinki, including  
1029 but not limited to:

- 1030
- 1031 1. Local Institute Review Board (IRB)/Central IRB review and approval of  
1032 study protocol and any subsequent amendments.
  - 1033 2. Subject informed consent for main trial, SPRINT MIND, genetic testing,  
1034 and post trial contact, and any ancillary studies. The study consent will  
1035 contain the six essential elements from GCP guidelines that include:
    - 1036 • Research statement, reasonably foreseeable risks or discomforts,  
1037 reasonably expected benefits to subjects or others, appropriate  
1038 alternatives, extent of confidentiality, compensation or treatment  
1039 for injury.
    - 1040 • Additional elements where appropriate such as unforeseeable  
1041 risks to subjects, embryos, or fetuses, investigator-initiated  
1042 termination of participation, additional costs, significant new  
1043 findings, authorization for release of protected health Information  
1044 for research purposes.
  - 1045 3. Investigator reporting requirements.

1046  
1047 Written informed consent and Health Insurance Portability and Accountability Act  
1048 (HIPAA) authorization must be obtained from each person prior to enrollment into  
1049 SPRINT. In collaboration with the CCNs, the SPRINT Coordinating Center will provide  
1050 full details and template documents for the above procedures in the Manual of  
1051 Procedures and provide training to the investigators and clinical staff on regulatory and  
1052 ethical considerations. All study personnel will be responsible for completing and  
1053 remaining current with all applicable human subjects' protection, good clinical practice  
1054 and data security and privacy training requirements

1055  
1056 **3.2.2 Existing Populations in the Clinical Site Practices**

1057 Methods for identifying potentially eligible participants within the clinical practice of the  
1058 research settings may include: a targeted review of medical records or databases for  
1059 those meeting the trial's inclusion criteria, referrals from providers/employees within the  
1060 practice and/or from practice participants themselves. Additional approaches may also  
1061 include written materials such as direct mailing and/or advertisement on such items as  
1062 appointment reminders.

1063  
1064 **3.3. Screening Visits/ Baseline Visits**

1065  
1066 **Screening Activity Considerations**

1067 Each SPRINT clinical center should consult their local IRB regarding approval  
1068 requirements to access internal medical record searches for potential SPRINT patients.  
1069 Depending upon the institution, prior approvals for data transfer agreements may be  
1070 needed to obtain de-identified patient information. Pursuant to such agreements  
1071 investigators may be required to sign a privacy agreement to protect the patient's  
1072 protected health information (PHI) as well as comply with other policies and procedures  
1073 as defined by the institution's designated privacy, security and compliance services.

1074



1075 SPRINT clinical centers will work with the respective CCNs to complete Health  
1076 Insurance Portability and Accountability Act (HIPAA) Privacy rule documents,  
1077 preparatory to research waivers and training prior to patient medical record searches.  
1078 Once local regulatory requirements have been approved, investigator plans to identify  
1079 potential study patients may be implemented. Large scale data base searches, stratified  
1080 by key specified inclusion criteria may also yield a global assessment of the potentially  
1081 eligible study population. Other study parameters (e.g. age, race, gender CKD status,  
1082 etc.) can be added to further specify the eligible population.

1083  
1084 Prior to conducting prescreening and screening activities, it may also be necessary to  
1085 request additional approvals beyond the IRB (e.g. physician approval or consultation for  
1086 a screening referral to the SPRINT clinic). Participant informed consent must also be  
1087 obtained prior to performing any procedures related to the trial.

### 1088 1089 **Screening Visits/Baseline Visit**

1090 The following are key elements of the screening and baseline visits and are outlined in  
1091 the study assessments and procedures below:

1092

#### 1093 **Screening Visit(s)**

- 1094 1. Verify participant's interest in study.
- 1095 2. Obtain in person study consent and HIPAA authorization for main trial, and if  
1096 applicable, SPRINT MIND, genetic testing and any ancillary studies
- 1097 3. Continue collection of screening information, including such items as contact  
1098 information, additional eligibility information including BP measurement, concomitant  
1099 medications, and medical history.

1100

#### 1101 **Baseline visit (Randomization Visit)**

- 1102 1. Confirmation that all inclusion/exclusion criteria satisfied
- 1103 2. Verification of participant consent and HIPAA authorization.
- 1104 3. Verification of participant contact information
- 1105 4. Obtain a Release of Information, as permitted by local policy, to collect event and  
1106 serious adverse event (SAE) documentation
- 1107 5. Completion of the study randomization procedure and baseline data collection,  
1108 including obtaining BP, ECG, and blood and urine samples for analysis and storage at  
1109 the central lab

1110

1111 Data obtained from the screening, and randomization visits must be supported in the  
1112 patient's source documentation. Visit data will be entered into the SPRINT database  
1113 within a specified time frame determined by the SPRINT Coordinating Center.

1114

## 1115 Chapter 4 – Intervention

1116

1117 *In Protocol Version 5.0, the below intervention is included for informational*  
1118 *purposes only. The blood pressure intervention, which randomized participants*  
1119 *to a blood pressure treatment goal of <120 mm Hg or <140 mm Hg, has been*  
1120 *discontinued as a result of the Data and Safety Monitoring Board (DSMB)*  
1121 *recommendation to unmask trial investigators and notify participants of the lower*  
1122 *rate of cardiovascular outcomes and total mortality in the intensive arm.*

1123

1124 *Participants' blood pressure management is being transitioned from SPRINT to*  
1125 *the participants' health care providers. Participants are instructed to continue*  
1126 *taking their antihypertensive medications and to contact their primary health care*  
1127 *provider. Participants' health care providers should resume responsibility for*  
1128 *managing their patients' antihypertensive medication and setting their blood*  
1129 *pressure goals.*

1130

1131 *Participants will continue on their current SPRINT medications until they see their*  
1132 *personal physician or health care provider, or unless a change is required for*  
1133 *safety purposes. Once a participant's provider has again assumed care of the*  
1134 *participant, the study staff will no longer manage the participant's blood pressure,*  
1135 *but we will ask participants to come to their regularly scheduled visits until*  
1136 *closeout visits begin. However, for participant convenience during the transition*  
1137 *and closeout periods, the trial will provide participants with trial medication,*  
1138 *including a 3-month supply at the closeout visit. If the health care provider makes*  
1139 *changes to the participant's blood pressure medications, the study will provide*  
1140 *these medications if they are part of the SPRINT formulary.*

1141

### 1142 Blood Pressure Goals

1143

1144 Participants eligible for the trial will be randomized to one of two goals: SBP <120 mm  
1145 Hg for the more intensive goal (Intensive Group) and SBP <140 mm Hg for the less  
1146 intensive goal (Standard Group). Figures 4.1 and 4.2 describe the treatment algorithms  
1147 for the two treatment groups. Although there are no diastolic blood pressure (DBP)  
1148 inclusion criteria, participants in both groups with DBP ≥90 mm Hg will be treated to a  
1149 DBP goal of <90 mm Hg if needed after meeting the SBP goal, because of the many  
1150 trials documenting the CVD benefits in treating to a DBP goal <90 mm Hg.

1151

### 1152 Antihypertensive Classes (Agents)

1153

1154 Use of once-daily preparations of antihypertensive agents will be encouraged unless  
1155 alternative dosing frequency (e.g., BID) is indicated/necessary. One or more medications  
1156 from the following classes of agents will be provided by the study and intended for use in  
1157 managing participants in both randomization groups to achieve study goals:

1158

- 1159 • Angiotension converting enzyme (ACE)-inhibitors
- 1160 • Angiotension receptor blockers (ARBs)
- 1161 • Direct vasodilators
- 1162 • Thiazide-type diuretics
- 1163 • Loop diuretics
- 1164 • Potassium-sparing diuretics

- 1165 • Beta-blockers
- 1166 • Sustained-release calcium channel blockers (CCBs)
- 1167 • Alpha1-receptor blockers
- 1168 • Sympatholytics

1169  
1170 Combination products will be available, depending on cost, utility, or donations from  
1171 pharmaceutical companies

1172  
1173 **Selection of Antihypertensive Medications**

1174  
1175 The SPRINT trial is testing a treatment strategy question regarding different SBP goals  
1176 and not testing specific medications. The SPRINT BP treatment protocol is flexible in  
1177 terms of the choice and doses of antihypertensive medications, but there should be  
1178 preferences among the drug classes, based on CVD outcome trials results and current  
1179 guidelines. NHLBI is updating various guidelines. The update of hypertension  
1180 recommendations, JNC-8, should be available early in the recruitment phase of SPRINT.  
1181 These updates, along with any new scientific developments, will be considered during  
1182 and following SPRINT protocol development and throughout the trial.

1183  
1184 The investigator may select among the available SPRINT antihypertensive medications  
1185 for initiation of therapy. Other drugs not supplied by the trial may also be used as the  
1186 investigator determines appropriate. However, all antihypertensive regimens should  
1187 include one or more drug classes with strong CVD outcome data from large randomized  
1188 controlled hypertension trials, i.e., a thiazide-type diuretic, calcium channel blocker, ACE  
1189 inhibitor or ARB. Current evidence, the most recent JNC guidelines and over 40 years  
1190 of clinical trial experience in hypertension support the inclusion of a thiazide-type diuretic  
1191 as one of the agents for patients without compelling reasons for another medication, or  
1192 contraindication or intolerance to a thiazide-type diuretic. (ALLHAT, 2002;Beckett and  
1193 others, 2008;Chobanian and others, 2003;Psaty and others, 1997;SHEP, 1991) Other  
1194 classes associated with substantial reductions in CVD outcomes in hypertension trials,  
1195 e.g. ACE inhibitors, ARBs, and calcium channel blockers, combine effectively with  
1196 thiazides for lowering BP (Julius and others, 2004). ACE inhibitors and ARBs also  
1197 combine well with CCBs; if three drugs are needed, a thiazide-type diuretic, a RAS  
1198 blocker (ACE inhibitor or ARB, but usually not both), and CCB make a very effective and  
1199 usually well-tolerated regimen (Calhoun and others, 2009). The preference for the order  
1200 in which these agents are selected is left to the investigator as long as the SBP goals  
1201 are achieved. A loop diuretic may be needed in addition to or in place of a thiazide-type  
1202 diuretic for participants with advanced CKD.

1203  
1204 Beta-adrenergic blockers, which were recommended in JNC-7 among the 4 preferred  
1205 classes after diuretics, are now considered to be less effective in preventing CVD events  
1206 as primary treatment of hypertension compared with thiazide-type diuretics, CCBs, and  
1207 RAS blockers (Lindholm, Carlberg, and Samuelsson, 2005) However, there are patients  
1208 for whom beta-blockers should be part of the initial therapy, namely those with coronary  
1209 artery disease, including chronic stable angina or previous MI (Rosendorff and others,  
1210 2007).

1211  
1212 Finally, although renoprotective benefits have been demonstrated in CKD patients with  
1213 proteinuria, ACE inhibitors (and likely other RAS blockers) are less effective than other  
1214 classes in lowering BP and in preventing CVD events in African American and elderly

1215 hypertensive patients unless combined with a diuretic or CCB (Julius and others,  
1216 2004;Mancia and others, 2007;National Collaborating Centre for Chronic Conditions,  
1217 2006;Wright and others, 2005;Wright and others, 2008).

1218  
1219 Since more than three drugs will be necessary in many participants to reach the  
1220 intensive SBP goal, other classes will also be available in SPRINT. These include the  
1221 potassium-sparing diuretics, spironolactone and/or amiloride, which are very effective as  
1222 add-on agents for BP-lowering in “resistant hypertension” (Calhoun and others, 2008).  
1223 However, they should be used with careful monitoring in participants with CKD or any  
1224 tendency to hyperkalemia. Alpha-blockers have been used effectively as add-on  
1225 therapy in the AASK, ACCORD and Anglo-Scandinavian Cardiac Outcomes (ASCOT)  
1226 trials. However, alpha-blockers should be used only in combination with one or more  
1227 other agents proven to reduce CVD events in hypertensive patients (ALLHAT, 2003).  
1228 Sympatholytics, direct vasodilators, and/or loop diuretics may also be added for BP  
1229 control in combination with agents proven to reduce CVD events.

1230  
1231 Among thiazide-type diuretics, the most consistent and robust CVD outcome data have  
1232 been seen with chlorthalidone (ALLHAT, 2002;SHEP, 1991). Chlorthalidone 12.5-25  
1233 mg/d has been shown to be more effective in lowering BP over 24 hours than  
1234 hydrochlorothiazide 25-50 mg/d (Ernst and others, 2006). Among CCBs, amlodipine has  
1235 been used in far more hypertension CVD outcome trials than any other agent and has  
1236 more robust CVD outcome data. Amlodipine should be considered first when a CCB is  
1237 to be used. In the presence of significant proteinuria, amlodipine should probably be  
1238 used in conjunction with a RAS blocker. If a non-dihydropyridine CCB (e.g., diltiazem) is  
1239 to be used, it should not be combined with a beta-blocker.

1240  
1241 The ACCORD experience (The ACCORD Study Group, 2010) has shown that a  
1242 treatment strategy that includes a variety of classes, can produce a 14 mm Hg delta in  
1243 SBP between the two randomized groups. The average number of antihypertensive  
1244 drugs used to produce this difference was 3.4 and 2.1 in the Intensive and Standard  
1245 Groups, respectively. It is anticipated that the study participants in the CKD subgroup of  
1246 SPRINT will require a greater number of antihypertensive drugs to reach the lower BP  
1247 goal (Cushman and others, 2008)

#### 1248 1249 **Visit Frequency**

1250  
1251 For both randomized groups, routine visit frequency will be monthly for the first three  
1252 months after randomization, then every three months for the duration of the trial.  
1253 “Monthly visits will continue in the Intensive Group until SBP <120 mm Hg (or no more  
1254 titration planned) and in the Standard group whenever SBP  $\geq$  160 mm Hg.” Additional  
1255 visits will be scheduled as needed for management of adverse effects or for monitoring  
1256 significant medication changes or other clinical issues.

#### 1257 1258 **Intensive BP Goal Group (Figure 4.1)**

1259  
1260 The SBP goal for the Intensive Group, <120 mm Hg, should be achievable in the  
1261 majority of participants within 8-12 months of follow-up based on the ACCORD  
1262 experience (The ACCORD Study Group, 2010). For most participants in the Intensive  
1263 Group, a two- or three-drug regimen of a diuretic and either an ACE inhibitor or ARB  
1264 and/or a CCB should be initiated at randomization. If a diuretic is contraindicated or not  
1265 tolerated, an ACE inhibitor or ARB plus a CCB should be initiated. A beta-blocker

1266 should be included in the initial regimen, usually in combination with a diuretic, if there is  
1267 a compelling indication for a beta-blocker. Drug doses should be increased and/or  
1268 additional antihypertensive medications should be added at each visit in the Intensive  
1269 Group, usually at monthly intervals, until the participant's goal of <120 mm Hg has been  
1270 reached or the investigator decides no further antihypertensive medications may be  
1271 added.

1272  
1273 SPRINT provides a unique opportunity to determine both the efficacy and safety of  
1274 intensive BP control in elderly populations. However, based on limited data, there is a  
1275 concern that this population may be less tolerant of aggressive BP lowering. Therefore,  
1276 in participants  $\geq 75$  years of age randomized to the intensive BP goal who are on 0-1  
1277 antihypertensive medications and have baseline SBP <140 mm Hg, antihypertensive  
1278 therapy may be initiated with a single agent at the discretion of the investigator with a  
1279 return visit scheduled in one month. If the participant is asymptomatic at the first post-  
1280 randomization visit and SBP  $\geq 130$  mm Hg, a second agent will be added and titration  
1281 continued as indicated in above.

### 1282 1283 **Milepost Visits**

1284  
1285 “Clinical inertia” in hypertension management, where clinicians fail to intensify therapy  
1286 despite patients not being at goal BP, has been observed in both clinical practice  
1287 (Berlowitz and others, 1998) and clinical trial settings (Cushman and others, 2002). For  
1288 this reason, “Milepost Visits” were used in the intensive BP group in the ACCORD trial to  
1289 assist in reaching goal SBP (Cushman and others, 2007). For SPRINT participants in  
1290 the Intensive Group, Milepost Visits will be every 6 months throughout follow-up,  
1291 beginning at the 6-month visit. If the SBP is not <120 mm Hg at a Milepost Visit, then an  
1292 antihypertensive drug from a class different from what is being taken should be added,  
1293 unless there are compelling reasons to wait. A “Milepost Exemption Form” will be  
1294 completed whenever a new drug is not added at a Milepost Visit in which the  
1295 participant’s BP is not <120 mm Hg to document the reason for not adding a drug and to  
1296 outline a plan for making progress toward goal in that participant. Milepost Visit  
1297 procedures do not apply to the Standard Group. Once the Intensive Group participant  
1298 has been prescribed 5 drugs at maximally tolerated doses, if the BP remains above goal  
1299 at subsequent Milepost Visits, it will be permitted to substitute a different class into the  
1300 regimen instead of adding another drug or increasing the dose of a drug. However,  
1301 additional (more than 5) drugs may be needed to achieve goal SBP in some participants.  
1302 Medication adherence will be assessed routinely in SPRINT and should be evaluated  
1303 especially carefully for participants not at goal on 4 or more medications. Strategies to  
1304 enhance adherence are described in brief in Chapter 5 and in detail in the Manual of  
1305 Procedures and Adherence Binder.

### 1306 1307 **Standard BP Goal Group (Figure 4.2)**

1308  
1309 The SBP goal for the Standard Group, <140 mm Hg, should be achievable in the  
1310 majority of participants within 3-6 months, based on the ACCORD experience (The  
1311 ACCORD Study Group, 2010). The standard BP protocol is designed to achieve a SBP  
1312 of 135-139 mm Hg in as many participants as possible. Participants in this group may or  
1313 may not be on treatment with one or more antihypertensive medications. If  
1314 antihypertensive medication(s) is indicated per protocol, consideration should be given  
1315 to including a thiazide-type diuretic as initial therapy or as part of the regimen, unless  
1316 there is a compelling indication for another drug class or intolerance to a thiazide.

1317 At the randomization visit, Standard Group participants on previous antihypertensive  
1318 drug therapy should be converted to SPRINT medications or no medications, depending  
1319 on what the investigator believes is most likely to achieve a SBP level between 135-139  
1320 mm Hg. Because we expect a decrease in average SBP within the Standard Group  
1321 following randomization due to improved adherence, lifestyle counseling, and intra-  
1322 individual variation, sometimes described as “regression to the mean”, treatment should  
1323 not be intensified at the randomization visit for Standard Group participants unless SBP  
1324  $\geq 160$  mm Hg or there is a compelling reason to add medication, e.g., management of  
1325 fluid balance in participants with CKD. Following the randomization visit, medication  
1326 dose titration or addition of another drug is indicated if SBP is  $\geq 160$  mm Hg at a single  
1327 visit or is  $\geq 140$  mm Hg at two successive visits.

1328  
1329 Because it is not known if lowering SBP to the more intensive SPRINT goal of  $< 120$  mm  
1330 Hg, compared with the standard goal of  $< 140$  mm Hg, is beneficial, neutral, or harmful in  
1331 patients such as those entered into the SPRINT trial, careful step-down (a reduction of  
1332 the dose or number of antihypertensive drugs) is allowed for participants in the Standard  
1333 Group. Down-titration was not permitted in the HOT Trial if DBP was well below the goal  
1334 for a participant (Hansson and others, 1998) – this likely contributed to the small  
1335 differences in achieved BP between the three randomized groups and limited the study's  
1336 ability to detect differences in outcomes. Therefore, down-titration was included in the  
1337 ACCORD and AASK standard BP protocols and was successful in generating the  
1338 planned differences in BP between treatment arms. Down titration should be carried out  
1339 if the SBP is  $< 130$  mm Hg at a single visit or  $< 135$  mm Hg at two consecutive visits  
1340 (Figure 4.2).

1341

#### 1342 **Diastolic Blood Pressure Treatment**

1343

1344 Once the SBP goal has been achieved in any participant, the antihypertensive regimen  
1345 should be intensified if DBP remains  $\geq 100$  mm Hg at a single visit or  $\geq 90$  mm Hg at two  
1346 successive visits to achieve DBP  $< 90$  mm Hg. The visit intervals and decisions for  
1347 titration (other than the BP levels) will be similar to those used for the SBP goal. Since  
1348 beta-blockers reduce DBP more than SBP relative to other antihypertensive  
1349 medications, a beta-blocker could be considered for such participants (Cushman and  
1350 others, 2001).

1351

#### 1352 **Use of Home BP Devices**

1353

1354 Home BP devices will not be provided to all participants by the trial. Since virtually all  
1355 BP outcome trials have used office BP determinations and home readings are subject to  
1356 more bias and error, in SPRINT titration of medications to goal should be based on office  
1357 readings rather than home BP determinations.

1358

#### 1359 **Assessment of Orthostatic Hypotension (OH), Measurement of Standing Blood 1360 Pressure**

1361

1362 Standing BP will be measured at screening, baseline, 1 month, 6 months, 12 months,  
1363 and annually thereafter, and the close-out visit, using the same BP device that is used to  
1364 measure seated BP. After seated determinations, participants will be asked to stand.  
1365 Beginning when their feet touch the floor, BP will be taken one minute later in the same  
1366 arm used for the seated measurements, using the BP device. Participants will be asked  
1367 after the standing determination if they had any symptoms of orthostatic hypotension

1368 during the standing BP measurement. The Coordinating Center will calculate BP  
1369 change using the standing measurements minus the mean of the seated measurements.  
1370

1371 Participants with standing SBP <110 mm Hg will not be eligible for randomization (may  
1372 be rescreened if corrected). However, the detection of asymptomatic orthostatic  
1373 hypotension, i.e., orthostatic hypotension unaccompanied by orthostatic symptoms of  
1374 dizziness, presyncope or syncope, will not influence the antihypertensive drug treatment  
1375 algorithm. Symptomatic orthostatic hypotension will be managed as described in  
1376 "Management of Symptomatic Orthostatic Hypotension" (see Manual of Procedures).  
1377

#### 1378 **4.1 Lifestyle Recommendations and Background Therapy** 1379

1380 The purpose of including lifestyle recommendations and background therapy in SPRINT  
1381 is twofold. First, it fosters high quality general medical care in all SPRINT participants in  
1382 accordance with current practice guidelines. Second, it is intended that background  
1383 therapies will be utilized equally across both study arms in order to minimize the  
1384 differences in the effects of non-study strategies on the SBP or CV outcomes between  
1385 arms. The background therapy recommendations will be provided to the participants  
1386 and their physicians. Background therapy is considered part of usual recommended  
1387 care for patients at risk of CVD and, as such, is not covered by research study costs.  
1388 The delivery of these background therapies will be left up to the participants' own  
1389 clinicians.  
1390

1391 The Lifestyle and Background Therapy Working Group will coordinate the provision of  
1392 the most current and relevant participant educational materials to be made available for  
1393 study-wide use. These will include the topics of medical nutrition therapy, weight  
1394 management, physical activity, smoking cessation, and anti-thrombotic therapy, and will  
1395 complement educational materials related to the BP interventions that are part of the  
1396 trial. Unlike most educational materials for BP, the SPRINT materials will not include  
1397 specific goals for BP as these will depend on the participants' randomized treatment  
1398 assignment. Specific recommendations will include: a) weight loss in those who are  
1399 overweight or obese; b) adoption of a diet rich in fruits, vegetables and low-fat dairy  
1400 products (the DASH diet) with appropriate modifications for participants with CKD; c)  
1401 reduction in sodium intake to recommended levels; d) reduction of alcohol consumption  
1402 to recommended levels; and e) participation in regular aerobic exercise. SPRINT  
1403 participants will be encouraged to stop smoking (if a current smoker) and to follow  
1404 current guidelines for testing for and treatment of dyslipidemia and the use of  
1405 antithrombotic therapy.  
1406  
1407  
1408

1409  
1410

Figure 4.1 Treatment Algorithm for Intensive Group (Goal SBP < 120 mm Hg)

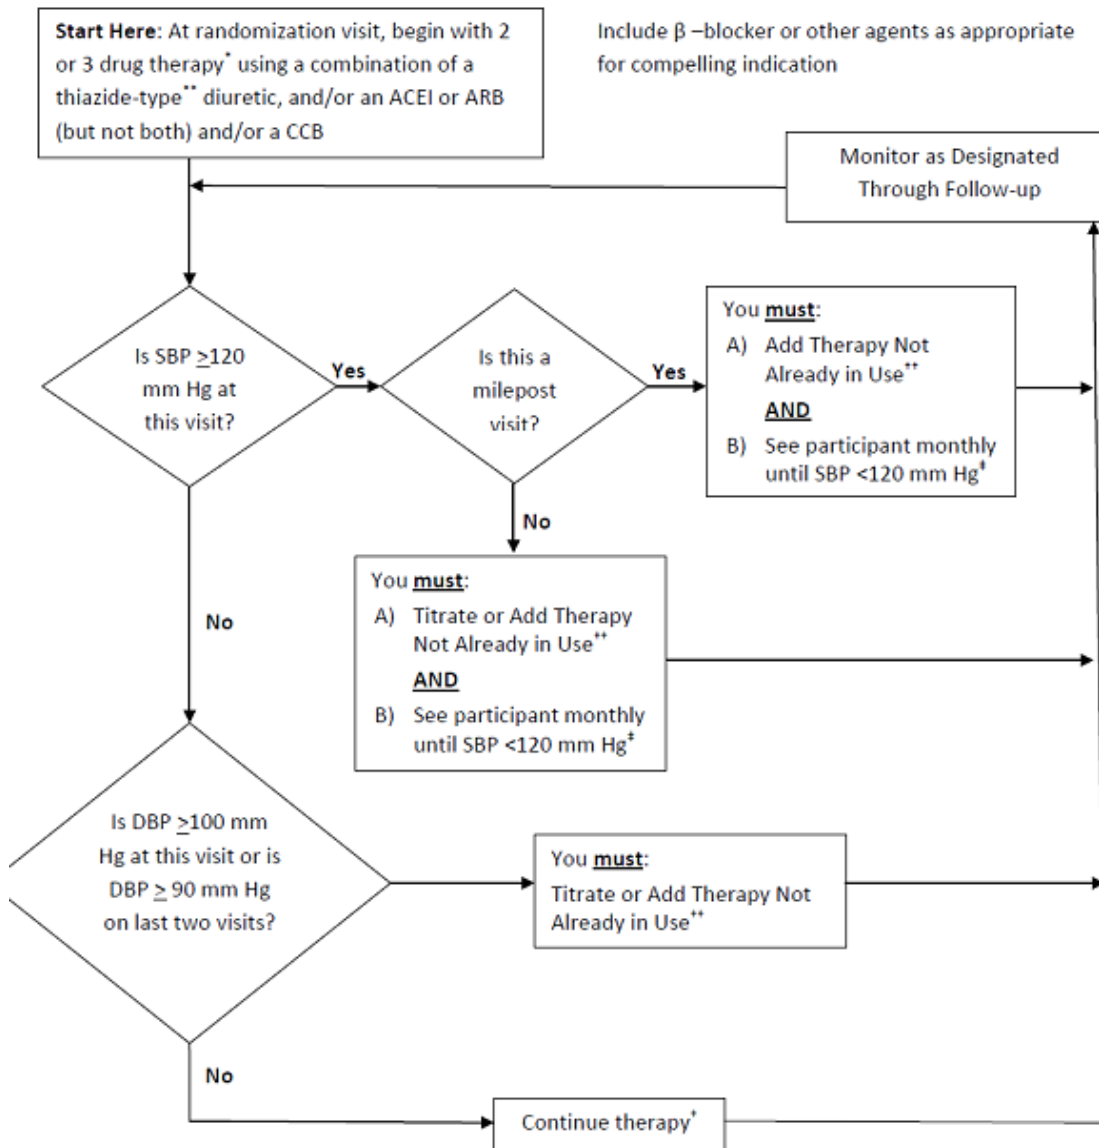

\* May begin with a single agent for participants 75 years old or older with SBP < 140 on 0-1 meds at study entry. A second medication should be added at the 1 Month visit if participant is asymptomatic and SBP  $\geq$  130.

\*\* May use loop diuretic for participants with advanced CKD

† Unless side effects warrant change in therapy

\*\* Consider consulting with the Clinical Center Network before adding a fifth anti-hypertensive medication

† Or until clinical decision made that therapy should not be increased further

1411  
1412  
1413  
1414  
1415



1416  
1417

Figure 4.2 Treatment Algorithm for Standard Group (Goal SBP < 140 mm Hg)

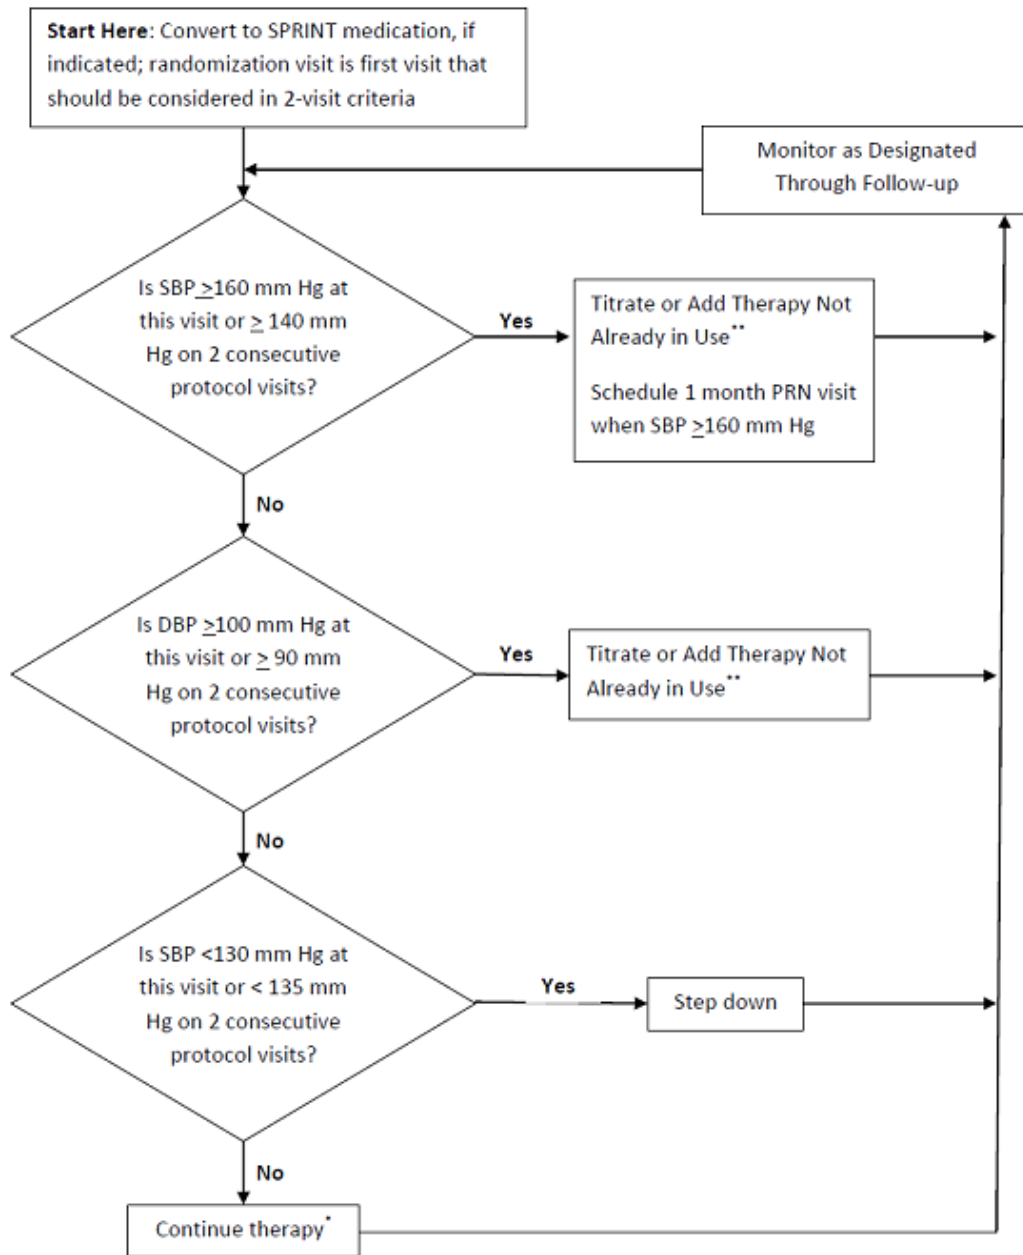

Include  $\beta$ -blocker or other agents as appropriate for compelling indications

\* Unless side effects warrant change in therapy

\*\* Consider consulting with the Clinical Center Network before adding a fifth anti-hypertensive medication

1418

1419  
1420  
1421  
1422  
1423  
1424  
1425  
1426  
1427  
1428  
1429  
1430  
1431  
1432  
1433  
1434  
1435  
1436  
1437  
1438  
1439  
1440  
1441  
1442  
1443  
1444  
1445  
1446  
1447  
1448  
1449  
1450  
1451  
1452  
1453  
1454  
1455  
1456  
1457  
1458  
1459  
1460  
1461  
1462  
1463  
1464  
1465  
1466  
1467  
1468

## **Chapter 5 – Measurements and Follow-up**

### **5.1.1 Schedule of Follow-Up Visits**

Post-randomization follow-up visit schedules for data collection do not differ by treatment group assignment. However, the visit schedule for treatment, that is achieving the BP goals, may differ by group while blood pressure goals are being met because of PRN visits not shown on Table 5.1. Additional information on treatment schedules is contained in Chapter 4 describing the SPRINT BP intervention. For data collection in both randomized groups, all participants will have post-randomization visits at Months 1, 2, 3, 6, and every 3 months thereafter. For the purpose of event ascertainment, all participants in both treatment groups will be queried regarding the occurrence of a possible event on the same schedule, specifically every 3 months.

### **5.1.2 Procedures by Visit**

Scheduled examination components are shown by visit in Table 5.1. Assessments performed at the various visits include blood and urine collection, physical measures, and questionnaires. Assessments will be performed on the same schedule for both randomization groups. Baseline characteristics to define the patient population include sociodemographics, anthropometrics, BP, pulse, current and past medical history, concomitant medications, laboratory, dementia screening, cognitive function (subset), MRI (subset) and quality of life measurements. A physical examination is included for safety but is not standardized, and left to the discretion of the investigator.

## **5.2. Blood and urine collection and laboratory assays**

Specific laboratory assessments (e.g. serum creatinine, fasting serum glucose, etc) are important for determining eligibility status. During follow-up, laboratory results will be used to monitor and adjust therapy in efforts to maintain blood pressure goals, assess safety (e.g. serum potassium concentrations), and to assess for study-related outcomes (e.g. deterioration of estimated glomerular filtration rate or increased protein excretion).

Serum, plasma, and urine samples will be stored for future measurements of other less traditional CV risk factors. White blood cells will be collected at baseline for DNA extraction for future genetic studies. It may prove possible to identify subgroups, defined by specific genes or genetic markers, which respond differentially to the various blood pressure treatment strategies.

## **5.3. Physical Examination Measures**

### **5.3.1 Seated Blood Pressure and Pulse**

Seated blood pressure and pulse are measured at each clinic visit after a rest period using an automated device or manual devices if necessary. The preferred method is the automated device as it offers reduced potential for observer biases and decreased demand on staff in terms of training and effort in data collection.

1469  
1470

**Table 5.1. Measures and Frequency**

|                                                       | Screening /RZ | 1 mo | 2 mo | 3 mo | 6 mo | 9 mo | 1 yr | Q 3 mo | Q 6 mo | 2 yr | 3 yr | 4 yr | Close Out A*        | Close Out B**       |
|-------------------------------------------------------|---------------|------|------|------|------|------|------|--------|--------|------|------|------|---------------------|---------------------|
| <b>Blood collection</b>                               |               |      |      |      |      |      |      |        |        |      |      |      |                     |                     |
| Chemistry profile                                     |               | X    |      | X    | X    |      |      |        | X      |      | X    |      | X                   |                     |
| Fasting Chemistry profile                             | X             |      |      |      |      |      | X    |        |        | X    |      | X    |                     | X                   |
| Fasting glucose                                       | X             |      |      |      |      |      |      |        |        | X    |      | X    |                     | X                   |
| Fasting lipid profile                                 | X             |      |      |      |      |      | X    |        |        | X    |      | X    |                     | X                   |
| Fasting serum and plasma storage                      | X             |      |      |      |      |      | X    |        |        | X    |      | X    |                     | X                   |
| Genomic material                                      | X             |      |      |      |      |      |      |        |        |      |      |      |                     |                     |
| Complete Blood Count (CBC)***                         |               |      |      |      |      |      |      |        |        |      |      |      | X                   | X                   |
| <b>Urine collection</b>                               |               |      |      |      |      |      |      |        |        |      |      |      |                     |                     |
| Albumin, creatinine                                   | X             |      |      |      | X    |      | X    |        |        | X    | X    | X    | X                   | X                   |
| Fasting urine storage                                 | X             |      |      |      |      |      | X    |        |        | X    |      | X    |                     | X                   |
| <b>Physical measures</b>                              |               |      |      |      |      |      |      |        |        |      |      |      |                     |                     |
| Seated blood pressure, pulse, & medication adjustment | X             | X    | X    | X    | X    | X    | X    | X      |        | X    | X    | X    | X                   | X                   |
| Standing blood pressure                               | X             | X    |      |      | X    |      | X    |        |        | X    | X    | X    | X                   | X                   |
| Weight                                                | X             |      |      |      |      |      | X    |        |        | X    | X    | X    | X                   | X                   |
| Height                                                | X             |      |      |      |      |      |      |        |        |      |      |      |                     |                     |
| ECG                                                   | X             |      |      |      |      |      |      |        |        | X    |      | X    |                     | X                   |
| Physical examination                                  | X             |      |      |      |      |      | X    |        |        | X    | X    | X    | As required locally | As required locally |
| 4 meter walk (≥ 75 ONLY)                              | X             |      |      |      |      |      | X    |        |        | X    | X    | X    | X                   | X                   |
| <b>Questionnaires</b>                                 |               |      |      |      |      |      |      |        |        |      |      |      |                     |                     |
| Medical history                                       | X             |      |      |      |      |      |      |        |        |      |      |      |                     |                     |
| Sociodemographics                                     | X             |      |      |      |      |      |      |        |        |      |      |      |                     |                     |
| Alcohol use                                           | X             |      |      |      |      |      |      |        |        |      |      |      |                     |                     |
| Smoking                                               | X             |      |      |      |      |      | X    |        |        | X    | X    | X    | X                   | X                   |
| Concomitant medications                               | X             |      |      |      |      |      | X    |        |        | X    | X    | X    | X                   | X                   |
| Adherence & Adverse Events                            |               | X    | X    | X    | X    | X    | X    | X      |        | X    | X    | X    | X                   | X                   |
| Outcomes Ascertainment                                |               |      |      | X    | X    | X    | X    | X      |        | X    | X    | X    | X                   | X                   |
| <b>Health related quality of life</b>                 |               |      |      |      |      |      |      |        |        |      |      |      |                     |                     |
| EQ-5D                                                 | X             |      |      |      |      |      | X    |        |        | X    | X    | X    | X                   | X                   |
| Veterans Rand 12                                      | X             |      |      |      |      |      | X    |        |        | X    | X    | X    | X                   | X                   |
| PHQ-9 Depression                                      | X             |      |      |      |      |      | X    |        |        | X    | X    | X    | X                   | X                   |
| Patient satisfaction/Morisky                          | X             |      |      |      |      |      | X    |        |        |      |      | X    |                     | X                   |
| <b>Health related quality of life (subsets)</b>       |               |      |      |      |      |      |      |        |        |      |      |      |                     |                     |
| Falls Efficacy (FESI-I)                               | X             |      |      |      | X    |      | X    |        |        | X    | X    | X    |                     | X                   |
| Sexual Function (FSFI/IEFF)                           | X             |      |      |      | X    |      | X    |        |        | X    | X    | X    |                     | X                   |

1471  
1472

1473

| MIND Questionnaires/Tests         | Screening or RZ | 2 yr | 4 yr | Close Out A* | Close Out B** |
|-----------------------------------|-----------------|------|------|--------------|---------------|
| <b>Dementia Screening</b>         |                 |      |      |              |               |
| MoCA                              | X               | X    | X    |              | X             |
| Digits Symbol Coding Test         | X               | X    | X    |              | X             |
| Logical Memory Test Story A       | X               | X    | X    |              | X             |
| <b>Cognitive Battery (subset)</b> |                 |      |      |              |               |
| Hopkins Verbal Learning Test      | X               | X    | X    |              | X             |
| Trail Making Tests A and B        | X               | X    | X    |              | X             |
| Digit Span                        | X               | X    | X    |              | X             |
| Boston Naming Test                | X               | X    | X    |              | X             |
| Modified Rey-Osterrieth Figure    | X               | X    | X    |              | X             |
| Verbal Fluency Animals            | X               | X    | X    |              | X             |

1474

1475

1476

1477

1478

1479

1480

1481

1482

1483

1484

1485

1486

1487

1488

1489

1490

1491

1492

1493

1494

1495

1496

1497

1498

1499

1500

1501

**\*Close-out Visit A – Participants who have completed year 4 visit by the date of the site approval of this protocol amendment**

**\*\*Close-out Visit B – Participants who have NOT completed year 4 visit by the date of site approval of this protocol amendment**

**\*\*\*Complete Blood Count (CBC) will only be performed on participants included in the MRI study**

### 5.3.2 Standing (Orthostatic) Blood Pressure

Standing BP will be measured at screening, baseline, 1 month, 6 months, 12 months, and annually thereafter, and the close-out visit, using the same BP device that is used to measure seated BP. After seated determinations, participants will be asked to stand. Beginning when their feet touch the floor, BP will be taken one minute later in the same arm used for the seated measurements, using the BP device. Participants will be asked after the standing determination if they had any symptoms of orthostatic hypotension during the standing BP measurement. The Coordinating Center will calculate BP change using the standing measurements minus the mean of the seated measurements.

### 5.3.3 Anthropometric Measurements (Weight and Height)

Body fat is a significant predictor for subclinical and clinically manifested cardiovascular disease. In addition, exercise and dietary modification with the goal of reducing total body fat may facilitate blood pressure control. Anthropometric measures gathered for SPRINT include height and weight for the calculation of body mass index.

### 5.3.4 Electrocardiography

1502  
1503  
1504  
1505  
1506  
1507  
1508  
1509  
1510  
1511  
1512  
1513  
1514  
1515  
1516  
1517  
1518  
1519  
1520  
1521  
1522  
1523  
1524  
1525  
1526  
1527  
1528  
1529  
1530  
1531  
1532  
1533  
1534  
1535  
1536  
1537  
1538  
1539  
1540  
1541  
1542  
1543  
1544  
1545  
1546  
1547  
1548  
1549  
1550  
1551  
1552

A 12-lead ECG is obtained at baseline and at the 2 and 4 year follow-up visits and close-out visit, if the participant has not yet reached the 4 year follow-up visit, to ascertain the occurrence of silent (unrecognized) MI, primarily, as well as atrial fibrillation and left ventricular hypertrophy. The baseline ECG is used to identify previous (including silent) MIs, and to identify evidence of left ventricular hypertrophy.

### **5.3.5 Physical Examination**

The physical examination includes components of a systems-based examination deemed necessary for safety by the SPRINT site investigator. Elements of the examination to be completed may vary depending upon the health status and any symptoms reported by the participant, the time and type of visit (initial, interval, annual, close-out). The physical examination will not be standardized or data entered, but will be available in the source documents for each participant.

### **5.3.6 Four meter walk**

Participants who are 75 years old or older at baseline will be asked to complete a timed 4 meter walk to assess physical function. This will be done at baseline, annually, and at the close-out visit.

## **5.4. Questionnaires**

### **5.4.1 Medical History**

A detailed history of cardiovascular disease is collected at screening. The presence of CVD and CKD prior to entry into the study serves as an eligibility and stratification factor. Data regarding the duration of chronic kidney disease and the presence of complications are important for descriptive purposes, subgroup analyses, and prognostic analyses.

### **5.4.2 Sociodemographics**

Information is collected during screening/baseline regarding age, race and ethnicity, gender, level of education, marital status, persons living with participants and United States (zip) postal code. These data will be used to identify eligible participants and to characterize the final study population.

### **5.4.3 Smoking/alcohol use**

Consumption of alcohol and tobacco have important implications on cardiovascular risk, and adherence to medication regimens. Participants will be assessed at baseline for lifetime tobacco exposure, alcohol intake and binge drinking. At annual assessments and at the close-out visit, current smoking will be assessed.

### **5.4.4 Concomitant Medications**

Information regarding the participants' concomitant non-study medication therapy is collected and documented at baseline and then reviewed and revised at annual follow-up visits as well as at the close-out visit. Appropriate sources for obtaining this information include participant report, current pharmacy action profiles, and verification

1553 of medications documented in the medical record. Although data are collected on all  
1554 current therapies, emphasis is placed on concurrent antihypertensive, cardiovascular,  
1555 chronic kidney disease and dementia medications as well as background risk reduction  
1556 therapy such as aspirin and lipid-lowering drugs.

1557

#### 1558 **5.4.5 Monitoring Adherence**

1559

1560 Adherence to antihypertensive medications will be assessed as follows:

1561

1562 First, an adherence scale will be administered to all participants at the baseline, 12 month and  
1563 48 month visits, and the close-out visit if the participant has not reached their 48M visit at the  
1564 time of close-out, in order to identify low adherence.

1565

1566 Secondly, at every medication management visit, participants will be administered a single  
1567 item to screen for low adherence. If the participant's response to this item indicates a possible  
1568 problem with adherence, or if the participant is not at the appropriate blood pressure target,  
1569 study personnel will address the specific issues and barriers for each study participant that  
1570 may be preventing optimal adherence. In such instances, administration of the Adherence  
1571 Scale (to identify reasons for nonadherence) is recommended, as is use of the materials and  
1572 procedures described in the adherence binder. Details regarding the adherence monitoring  
1573 procedure, scoring algorithm for the Adherence Scale and the procedures to follow when low  
1574 adherence is identified are provided in the MOP.

1575

#### 1576 **5.4.6 Adverse events**

1577

1578 Adverse event ascertainment and reporting is described in chapter 8.

1579

#### 1580 **5.4.7 Study-related outcomes**

1581

1582 Both randomized groups will be assessed for study related outcomes in the same way  
1583 and on the same schedule. After randomization, participants will be assessed every 3  
1584 months for cardiovascular and renal outcomes. Medical records will be collected for  
1585 adjudication of study outcomes as described in Chapter 9. Clinical center staff will use  
1586 available resources and contact information to assess vital status annually on  
1587 participants not attending study visits.

1588

#### 1589 **5.4.8 Health-Related Quality of Life**

1590

1591 All participants will be assessed for the effect of interventions on health-related quality of  
1592 life (see Chapter 7). HRQL data will be collected at Baseline, 12 months and annually  
1593 thereafter, as well as at the close-out visit. Depression using the PHQ-9 scale will be  
1594 assessed at baseline and annually thereafter, and at the close-out visit. A modified  
1595 TSQM General Satisfaction subscale will be administered at baseline and at 1 and 4  
1596 years. A subset of participants will undergo additional data collection related to fall self-  
1597 efficacy and sexual functioning at baseline, 6 months and annually thereafter. This same  
1598 subset will receive the fall self-efficacy at the close-out visit, if the participant has not yet  
1599 reached the 4 year follow-up visit.

1600

1601

1602

#### 1603 **5.4.9 MIND Battery: Dementia Screening**

1604  
1605  
1606  
1607  
1608  
1609  
1610  
1611  
1612  
1613  
1614  
1615  
1616  
1617  
1618  
1619  
1620  
1621  
1622  
1623  
1624  
1625  
1626  
1627  
1628  
1629  
1630  
1631  
1632  
1633  
1634  
1635  
1636  
1637  
1638  
1639  
1640  
1641  
1642  
1643  
1644  
1645  
1646  
1647  
1648  
1649  
1650  
1651  
1652

All participants will undergo a dementia screening at baseline, 24M, and 48M or close-out visit (only if the participant has not completed the 48M MIND tests). The tests will include the Montreal Cognitive Assessment (MoCA), Digit Symbol Coding test, and Logical Memory test. A subset of 2800 participants will undergo an additional comprehensive battery of neurocognitive tests conducted at baseline, Month 24, and Month 48 or close-out visit (only if the participant has not completed the 48M MIND tests). In addition, participants who trip the dementia screening battery also will receive this comprehensive battery of neurocognitive tests. In addition to the neurocognitive tests, a subsample of 640 MIND participants will have a Baseline and Month 48 MRI examination.

#### **5.4.10 Consent for Future Contact**

At the close-out visit, participants will be asked to sign an addendum to the informed consent for future contact.

### **5.5. Medications and Adherence**

#### **Adherence**

As part of a central pretrial training session, all investigators and clinical coordinators will receive instruction on adherence issues. Additionally, study staff will periodically have refresher and retraining instruction in the overall adherence program throughout the trial. Also critical to maintaining good adherence is the routine discussion of participants who show problems with adherence and brain-storming about problem-solving strategies during clinic team meetings and Study Coordinator meetings and conference calls. Of particular importance is the involvement of all members of the clinic team, including clinic leadership, in adherence-related monitoring and problem-solving.

#### **Drug Dispensing, Ordering, Storage, and Disposal**

##### **Drug Dispensing**

The complexity created by the large number of medications and multiple treatment strategies employed by SPRINT requires substantial attention to the process of medication dispensing. All study medications dispensed to the participants will be labeled and identified with the study name, participant's name, medication name, strength and quantity, directions for use, and authorized prescriber's name. An emergency study-related phone number for study drug information will also appear on the label. All participants are to be verbally counseled on medication administration. Written instructions will also be provided.

Participants receive medication supplies at regularly scheduled visits in sufficient quantity to last until the next scheduled visit. Medication dispensing may occur in the intervening periods between visits in case of emergency, loss, or schedule changes. A tracking mechanism is maintained for all dispensing actions. It is recommended that authorized dispensing personnel be limited in number to assure proper adherence with established accountability and dispensing procedures.



1653 Drug Supply Ordering

1654 Each Clinical Site, upon completion of procedures for study initiation, will receive a  
1655 standard initial shipment (determined by the Coordinating Center and prepared by the  
1656 Drug Distribution Center (DDC)) of study drug supplies for the trial. It is expected that  
1657 this initial shipment will suffice for a specified number of visits for a given number of  
1658 randomized participants. Subsequent ordering of inventory will be managed by the site,  
1659 primarily through the web-based inventory system. Sites are responsible for  
1660 appropriately managing their inventory and are able to customize their medication  
1661 quantities to suit the prescribing practices of their site.

1662  
1663 The DDC in consultation with each Clinical Site sets inventory levels for each item.  
1664 When an item reaches the reorder point, additional stock is automatically shipped from  
1665 the DDC.

1666  
1667 Drug Receipt and Storage

1668 Drug shipments are sent to the Clinical Site in care of a designated staff member. The  
1669 shipment is inspected for damage and its contents reconciled with the accompanying  
1670 SPRINT Shipping Notice. The inventory is logged using the established tracking  
1671 mechanism. Packing slips are filed in a secure location. Any damage or discrepancies in  
1672 the shipment are to be reported promptly to the DDC for corrective action. Each Clinical  
1673 Site is responsible for storing the study drug supplies in a locked, secure area with  
1674 limited access. Manufacturer recommendations and local policies for drug storage are  
1675 followed.

1676  
1677 Drug Disposal

1678  
1679 Clinical Sites are authorized to destroy SPRINT stock locally, complying with any local  
1680 policies and procedures. Destruction will be documented via the web-based inventory  
1681 system. All study drugs are labeled with an expiration date. Prior to expiration, the DDC  
1682 will automatically ship replacement stock based on the current electronic inventory  
1683 profile. Once replacement stock is received the clinical site will destroy expired stock and  
1684 document destruction as described above.

1685

## Chapter 6 – SPRINT MIND

### 6.1 SPRINT-MIND Overview

SPRINT-MIND is an integral part of the overall SPRINT study and all SPRINT participants will participate in one or more components of SPRINT-MIND. There are three objectives of SPRINT-MIND. The primary objective is to determine whether a strategy of intensive blood pressure lowering to target systolic blood pressure (SBP) <120 mm Hg versus a standard treatment target of <140 mm Hg will produce a greater reduction in the incidence of all-cause dementia. The second objective is to determine whether global cognitive function measured in key specific domains of cognition will decline less in persons randomized to a SBP goal of <120 mm Hg versus a standard treatment goal of <140 mm Hg in a representative sub-sample of approximately 2800 SPRINT participants. The third objective is to assess whether MRI-derived changes in brain structure differ by treatment assignment in a subset (approximately 640) of the 2800 participants.

### 6.2 Study Hypotheses and Aims

#### 6.2.1 All-cause Dementia

Primary hypothesis: Over an average of 60 months, the incidence of all-cause dementia will be lower in SPRINT participants assigned to the intensive SBP treatment arm compared to their counterparts assigned to the standard SBP treatment arm. This hypothesis will be tested in all SPRINT participants.

#### 6.2.2 Cognitive Decline

Secondary hypothesis: Over an average of 48 months, the rate of global decline in cognition measured across key domains of cognition will be lower in the intensive SBP treatment arm compared to the standard SBP treatment arm. This hypothesis will be tested in a representative subset of approximately 2800 participants enrolled in SPRINT.

#### 6.2.3 MRI Brain Changes

The Primary brain MRI hypothesis is that over an average of 48 months, the volume small vessel ischemic disease (SVID) will be lower in SPRINT participants assigned to the intensive SBP treatment arm compared to their counterparts assigned to the standard SBP treatment arm. An additional hypothesis is that total brain volume will also be greater (thus less atrophy) in the intensively treated group. The MRI sub-study will be conducted in approximately 640 participants chosen from the 2800 subset of participants selected in 6.2.2.

### 6.3 Study Design

#### 6.3.1 Study Population

We will ascertain incident all-cause dementia in all participants enrolled in SPRINT. In addition, approximately 2800 participants will be selected to receive additional cognitive assessments at baseline, 24 months, and 48 months (or the close-out visit if the 48

1736 month tests have not been administered) in order to examine changes in global and  
1737 domain-specific cognition. Participants participating in the MRI substudy will, at baseline,  
1738 generally be required to reside within 1.5 hours travel distance to a designated study  
1739 MRI Scanner. The components of the two cognitive batteries selected to assess  
1740 dementia incidence and decline in cognition are listed in Table 5.1 of Chapter 5.

## 1741 1742 **6.4 Procedures for Identifying Incident All-Cause Dementia in SPRINT (see Figure** 1743 **6.1).**

### 1744 1745 **6.4.1 Overview**

1746  
1747 A 3-step process will be used to ascertain incident cases of all-cause dementia. First, to  
1748 identify possible cases of dementia a brief Cognition Screening Battery will be  
1749 administered to all participants. Participants who score below the pre-designated  
1750 screening cut-point for possible cognitive impairment during follow-up will be  
1751 administered a more comprehensive and detailed neurocognitive test battery (the  
1752 Extended Cognitive Assessment Battery) plus the Functional Assessment Questionnaire  
1753 (FAQ) which assesses impairments in daily living skills as a result of cognitive  
1754 impairments. Last, all the above available tests and questionnaire data will be submitted  
1755 to a centralized, web-based system for adjudication by a panel of dementia experts who  
1756 will assign final study classifications of probable dementia (PD), mild cognitive  
1757 impairment (MCI) or no impairment (NI).

### 1758 1759 **6.4.2 Cognition Screening Battery**

1760  
1761 A brief screening battery consisting of 3 well-validated neurocognitive tests will be  
1762 administered to all participants at study randomization and repeated at years 2, 4 (or  
1763 close-out if the Year 4 testing has not occurred. This battery requires 15 minutes or less  
1764 to administer.

1765  
1766 Tests included in the SPRINT-MIND Cognition Screening Battery were selected because  
1767 they are sensitive to detecting dementia, easy to administer and brief. They are:

- 1768
- 1769 1. The Montreal Cognitive Assessment (MoCA) The MoCA (Nasreddine et al.,  
1770 2005) is part of the NIH Toolbox and is a reliable and valid brief screening  
1771 instrument for characterizing global cognitive functioning. It has been used  
1772 previously to screen for dementia and MCI with sensitivity of >85%. The MoCA  
1773 has several sub-scales that can be used to characterize more specific cognitive  
1774 functions.
  - 1775  
1776 2. Digit Symbol Coding test (DSC) The DSC ((Wechsler, 1996b; Wechsler D., 1981)  
1777 is a sub-test of the Wechsler Adult Intelligence Scale-IV. It measures  
1778 psychomotor speed and working memory. The DSC and its predecessor the  
1779 Digit Symbol Substitution test have been extensively used and normed.
  - 1780  
1781 3. Logical Memory test (LM): The LM test is a sub-test of the Wechsler Memory  
1782 Scale-IV(Wechsler, 1996a; Wechsler, 1996a). It measures episodic verbal  
1783 memory and has extensive normative data. Episodic verbal memory is an  
1784 especially sensitive predictor of early Alzheimer's dementia and amnesic MCI.  
1785

1786 The sensitivity and specificity of the Cognition Screening Battery to detect  
1787 participants with poorer cognitive function will be evaluated on an ongoing basis during  
1788 the trial by using available baseline cognition data from SPRINT. We estimate 20-25% of  
1789 participants will trip the battery and receive a brief assessment of the impact  
1790 of their cognitive function on daily life (the 10 item FAQ). At the years 2 and 4 (or close-  
1791 out visit if the Year 4 tests have not been administered, participants who trip the  
1792 screening battery will also be administered the SPRINT Extended Cognitive Assessment  
1793 Battery and the FAQ for adjudication of incident dementia. In order to achieve the 20-  
1794 25% target, various cut-points for the Cognition Screening Battery will be compared and  
1795 adjustments will be made to maximize study efficiency and economy during the trial.

#### 1796 **6.4.3 SPRINT Extended Cognitive Assessment Battery**

1797 The Extended Cognitive Assessment Battery will provide a more comprehensive and  
1798 detailed assessment of specific major cognitive functions (memory, language,  
1799 visuospatial skills, executive function) that are necessary for classification of dementia  
1800 and for detecting domain-specific changes. During follow-up years 2 and 4 (or the close-  
1801 out visit if the Year 4 tests have not been administered), participants scoring in the  
1802 impaired range on the Cognition Screening Battery will be administered the Extended  
1803 Cognitive Assessment Battery at their next scheduled visit (typically a blood pressure  
1804 assessment and medication distribution visit). This entire battery requires less than 40  
1805 minutes including scoring and data entry and less than 30 minutes in persons without  
1806 significant memory impairment.

1807  
1808 The neurocognitive tests comprising the Extended Cognitive Assessment Battery are:

- 1809
- 1810 1) The Hopkins Verbal Learning Test (HVLT) (Brandt and Benedict, 2001): A  
1811 measure of episodic verbal learning and memory, this test is a 12-item list  
1812 learning and memory task with immediate recall, delayed recall and recognition  
1813 components.  
1814
  - 1815 2) The Trail Making Test: Parts A and B (Reitan R.M., 1958): The Trail Making Test  
1816 (TMT) is a two-part test measuring speed of processing and executive function.  
1817 The times to complete Part A and Part B are the primary measures of interest.  
1818
  - 1819 3) Digit Span test (Wechsler D., 1981): The Digit Span test (DST), a subtest of the  
1820 Wechsler Adult Intelligence Scale-IV, requires the participant to recite gradually  
1821 increasing series of digits forward and backward. The DST measures  
1822 concentration and working memory.  
1823
  - 1824 4) The Boston Naming Test (Kaplan E et al., 1983) The Boston Naming Test (BNT)  
1825 is used to assess language function. The participant is asked to name familiar  
1826 objects from simple drawings. The number of correctly identified objects is the  
1827 variable of interest. We will use a validated short form that includes 15 items.  
1828
  - 1829 5) The Modified Rey-Osterrieth Complex Figure (mRey-O). (Saxon, 2003) The  
1830 mRey-O measures of visuospatial and visuomotor function and non-verbal  
1831 memory by having participants copy and reproduce from memory a multi-  
1832 component figure. For ease of use and scoring reliability, the mRey-O figure will  
1833 be faxed to the CC and scored centrally.  
1834

1835 6) Category Fluency-Animals. The animal fluency task requires the participant to  
1836 spontaneously name as many animals as possible in 60 seconds. It provides an  
1837 assessment of semantic fluency.  
1838

#### 1839 **6.4.4 Additional measures**

1840  
1841 **Functional Assessment Questionnaire (FAQ).** Since impairment of daily functioning is  
1842 required for a classification of dementia, we also will administer, either locally (by  
1843 certified SPRINT clinic staff) or centrally (by certified SPRINT staff from the coordinating  
1844 center), the FAQ, a 10-item, validated questionnaire assessing functional status (Pfeffer  
1845 and others, 1982), to a person previously designated by the participant who is familiar  
1846 with his/her current abilities. Administration of the FAQ will be limited to participants in  
1847 the 2800 and those participants whose Cognition Screening Battery indicates possible  
1848 impairment. Items assess functions like managing money and remembering names of  
1849 familiar persons.  
1850

#### 1851 **6.4.5 Alternative cognitive assessment.**

1852  
1853 If participants cannot come to the clinic for their follow-up exams or if they reside in  
1854 nursing homes, study personnel will complete either a home or nursing home visit.  
1855 Technicians conducting the home visit must be MIND certified. The Screening Battery  
1856 and the Extended Battery can be administered during home visits.  
1857

1858 Telephone assessment of general cognitive function is now standard practice in many  
1859 large trials assessing for dementia outcomes. For SPRINT participants unable to receive  
1860 a face-to-face cognitive assessment by certified SPRINT staff at their local clinic, a  
1861 telephone assessment of cognition status to assess for incident dementia will be  
1862 performed centrally by SPRINT certified staff. The components of the **phone interview**  
1863 are:  
1864

1865 **Modified Telephone Interview for Cognitive Status (TICS-M)**, a validated  
1866 instrument requiring <10 minutes (Welsh, 1993)

1867 **Category Fluency-Animals**

1868 **Oral Trail Making Test** (Ricker et al., 1996)

1869 **FAQ** to a contact  
1870

1871 For participants unable to be interviewed in-person or by phone, a previously identified  
1872 contact will be administered:  
1873

1874 **The Dementia Questionnaire (DQ).** The DQ (Ellis , 1998;Kawaset al, 1994) is a  
1875 semi-structured interview designed for a knowledgeable proxy to provide  
1876 information regarding the participant's cognitive and behavioral functioning and  
1877 other health information needed to make a diagnosis of dementia and MCI and to  
1878 identify causes of cognitive impairment. Again, it will only be administered in the  
1879 absence of an in-person or phone assessment and may be performed either by  
1880 local or central staff who are SPRINT certified. The DQ will also be obtained on all  
1881 participants who died more than 1 year after their last MIND testing.  
1882

### 1883 **6.5 Adjudication of Dementia, MCI or No Impairment**

1884  
1885 A primary goal of SPRINT MIND will be to determine the incidence of all-cause dementia  
1886 in SPRINT and its relation to the treatment assignment. Final classification (Dementia,

1887 MCI or No Impairment) will be made by a panel of experts consisting of neurologists,  
1888 geriatricians, psychiatrists and neuropsychologists with recognized expertise in dementia  
1889 blinded to study assignment and blood pressure data. Data used in the adjudication will  
1890 include all available cognitive test data (SPRINT Cognition Screening Battery, SPRINT  
1891 Extended Cognitive Battery), functional status assessments (FAQ or DQ) and additional  
1892 data including demographic information and medical history. Each suspected case  
1893 identified by our scoring criteria (see 6.4) will be randomly assigned to two members of  
1894 the Adjudication Committee for review. Adjudicators will independently review all the  
1895 available data via a web-based system before recording their classification-Dementia,  
1896 MCI or No Impairment. Each adjudicator will be masked to the other's classification and  
1897 to the participant's treatment assignment. If the two adjudicators' classifications agree,  
1898 then the classification will become final. Disagreements will be resolved at periodic face-  
1899 to-face meetings or by phone conferences between adjudicators and additional  
1900 members of the Adjudication Committee until consensus is achieved. These procedures  
1901 have been successfully used by our team in other large clinical trials including the  
1902 Gingko Evaluation of Memory Study (GEMS) (DeKosky et al, 2008) and the Women's  
1903 Health Initiative Memory Study (WHIMS) (Shumaker et al, 2004).

1904  
1905 Participants classified as having dementia will no longer be assessed for cognitive  
1906 function. Those not classified as having dementia will continue to receive regularly  
1907 scheduled cognitive assessments with the screening and extended cognitive batteries  
1908 when indicated.

#### 1910 **6.5.1 Diagnostic Criteria for Dementia**

1911  
1912 Criteria used for identifying dementia will be those described in the Diagnostic and  
1913 Statistical Manual of the American Psychiatric Association-Fourth Edition (DSM-IV).  
1914 These are:

- 1915 • Significant decline in memory and at least one additional cognitive domain; and
- 1916 • Significant functional impairment due to cognitive problems; and
- 1917 • Cognitive deficits are not due to obvious reversible causes such as acute  
1918 illness, metabolic disturbances, infections, mood disorders or substance-  
1919 induced conditions; and cognitive deficits do not occur exclusively during the  
1920 course of delirium.

1921 No attempt to classify dementia subtype will be made.

#### 1923 **6.5.2 Diagnostic Criteria for MCI**

1924  
1925 While not a primary or secondary outcome, MCI syndrome is important because of its  
1926 relevance to dementia. MCI represents a transitional state between no cognitive  
1927 impairment and dementia and specific subtypes of MCI are highly predictive of  
1928 subsequent dementia. Thus, identifying MCI will provide valuable information about pre-  
1929 dementia cognitive impairment related to the SPRINT intervention. Criteria to be used  
1930 for identifying mild cognitive impairment syndrome are those described by Winblad et al.,  
1931 which are:

- 1932 • Observation by participant or proxy of cognitive decline; and
  - 1933 • Deficit in performance in one or more cognitive domains; and
  - 1934 • Absence of significant functional impairment attributable to cognition; and
  - 1935 • No diagnosed dementia
- 1936

1937 MCI will be further sub-classified into 4 categories using criteria adapted from Winblad,  
1938 et Al. (Winblad et al, 2004) as follows:

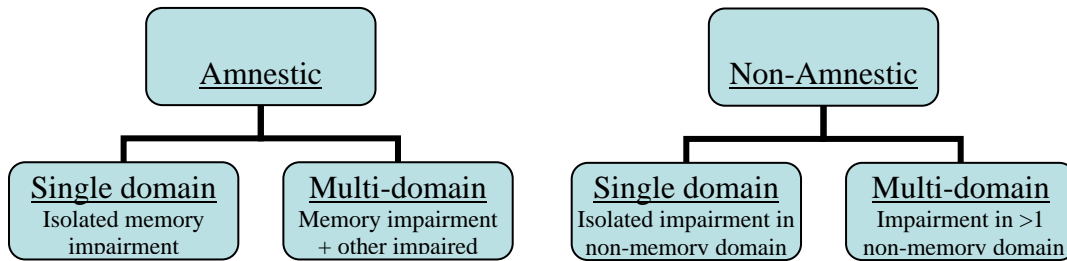

1940  
1941  
1942  
1943  
1944  
1945  
1946  
1947  
1948  
1949  
1950 Specific cognitive tests in the Cognition Screening Battery and the Extensive Cognitive  
1951 Assessment Battery will be used to subtype adjudicated cases of MCI.

### 1952 **6.6 Baseline classification of cognitive status:**

1953  
1954  
1955 Rare cases of dementia, where the participant or their personal physician are unaware of the diagnosis, may be identified during baseline cognitive testing. In participants  
1956 scoring below the cut-point on the Screening Battery, we will administer the FAQ to a  
1957 contact in order to determine the presence of impaired daily function related to  
1958 cognition (see 6.4.2).

### 1959 **6.7 Definition of Cognitive Change Over Time Outcome (Extended Cognitive Assessment Battery Sub Sample).**

1960  
1961 Each test score from the Cognition Screening Battery and the Extended Cognitive  
1962 Assessment Battery will be used to measure decline in cognitive function. The primary  
1963 outcomes will be composite scores for two domains: 1) Memory, consisting of the  
1964 Hopkins Verbal Learning Test, Logical Memory and the Modified Rey Osterrieth Figure,  
1965 and 2) Processing Speed, consisting of Trails Making Tests and Digit Symbol Coding  
1966 Test. Prior to analysis of this outcome, we will review the science related to summary  
1967 scores for cognitive function and may make modifications which will be specified prior to  
1968 initiation of the analysis.

### 1969 **6.8 Quality Control and Training**

1970  
1971 At each clinical site, at least one person will be identified to serve as the trained and  
1972 certified cognitive technician. Technicians will be trained during a central, intensive  
1973 training session held in conjunction with the overall SPRINT training. Training will  
1974 include review of the MIND protocol and procedures for administration of the test  
1975 batteries, demonstrations of each component of the SPRINT MIND test batteries, and  
1976 opportunities to practice with feedback from trainers. When a level of competence is  
1977 attained, technicians will receive certification and approval to administer the test  
1978 batteries to SPRINT participants. During the course of the study as additional staff are  
1979 needed, certified technicians will train new technicians and submit materials to the MIND  
1980 Coordinating Center for review. Technicians will be recertified throughout the course of  
1981 the trial by review of audio taped administrations. Technicians will be encouraged to  
1982 communicate questions or problems to the SPRINT MIND Coordinating Center.

1983  
1984  
1985  
1986  
1987

1988  
1989  
1990  
1991

Figure 6.1.

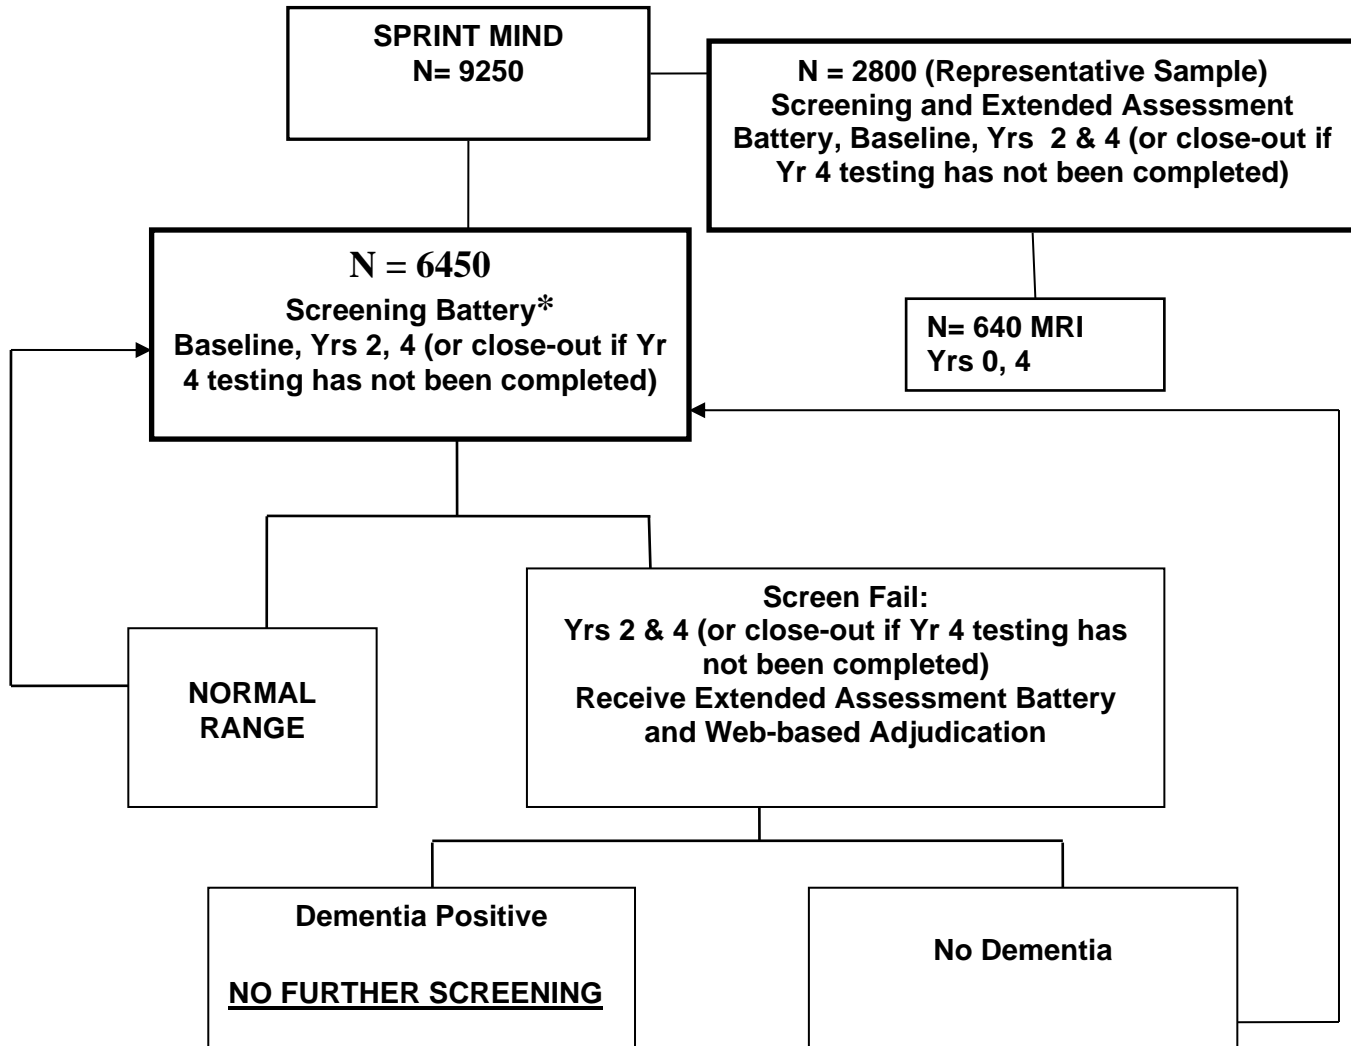

1992  
1993  
1994  
1995  
1996  
1997

\*At baseline, participants scoring below cutoffs specified during trial will also receive the FAQ.



1998 **Chapter 7 – Health-Related Quality of Life and Economic**  
1999 **Analyses**

2000  
2001 **7.1. Introduction**

2002 In addition to the cardiovascular, renal and cognitive outcomes, SPRINT is well poised to  
2003 examine differences in health-related quality of life (HRQL) as a result of its blood  
2004 pressure interventions. Differences in HRQL may affect adherence, and thus the  
2005 effectiveness of the two interventions. It is also reasonable to anticipate that in some  
2006 cases, the intensive arm may result in diminished HRQL relative to the standard arm due  
2007 to a number of factors:

- 2008 • side effects of specific medications or increased numbers and/or doses of  
2009 medications required to achieve the <120 mm Hg goal,
- 2010 • increased occurrence of hypotensive symptoms, which may not only result in  
2011 higher rates of falls and fractures, but also an increased fear of falling which  
2012 may limit the participant’s perceived ability to engage in activities of daily  
2013 living, and/or
- 2014 • reduced perfusion pressures and medication side effects which may  
2015 contribute to erectile dysfunction in men, and possible sexual dysfunctions in  
2016 women.

2017  
2018 On the other hand, the intensive arm may result in improved general HRQL versus the  
2019 standard arm due to reduced number of medical events and more favorable physical  
2020 and cognitive function. The effects of the two interventions upon HRQL are further  
2021 nuanced by the possibility that some participants in either treatment arm may adjust to  
2022 decrements in health status by changing their internal perception of favorable HRQL,  
2023 known as “response shift”.

2024  
2025 There may also be potential health cost tradeoffs of the intensive versus standard  
2026 treatment. While the intensive arm is anticipated to result in higher short-term costs due  
2027 to more frequent office visits and greater medication use, this arm may also result in  
2028 lower long-term costs from event-related hospitalizations and other medical costs if the  
2029 treatment approach is efficacious in reducing these medical events. Assuming the  
2030 primary outcomes are as hypothesized, examining the HRQL and cost-effectiveness of  
2031 the intensive and standard treatment arms will be important determinants of the potential  
2032 adoption of the intensive BP control in clinical practice, and will be informative in  
2033 identifying subgroups of patients for whom intensive or standard BP control is most  
2034 appropriate.

2035  
2036 **7.2. Hypotheses**

2037  
2038 **7.2.1 HRQL Hypotheses**

2039  
2040 The hypotheses generated for the HRQL measures are:

- 2041 • Overall HRQL (Entire sample, Veterans RAND-12) Intensive control of blood  
2042 pressure compared to standard control will result in worse HRQL at the 1-year  
2043 assessment, but better HRQL at the 5-year assessment. The effect will be  
2044 greater in those with lower baseline HRQL and greater number of comorbid  
2045 conditions at baseline.
- 2046  
2047

- 2048 • Falls Self-efficacy (Subsample, Falls Self Efficacy Scale) Intensive control of  
2049 blood pressure compared to standard control will result in less favorable fall-  
2050 related self-efficacy at the 1-year assessment. The effect will be the greater in  
2051 older participants, those with lower baseline HRQL, and those with a greater  
2052 number of baseline comorbid conditions. By Year 5, intensive control of blood  
2053 pressure will result in more favorable fall-related self-efficacy compared to  
2054 standard control.
- 2055
- 2056 • Sexual function (Subsample, Modified Female Sexual Function Assessment  
2057 /International Index of Erectile Function) Intensive control of blood pressure  
2058 compared to standard control will decrease sexual function among men and  
2059 women participants at one year. By year 5, the intensive treatment participants  
2060 will report more favorable sexual function compared to participants in the  
2061 standard treatment.
- 2062

## 2063 7.2.2 Cost-Effectiveness Hypotheses

2064  
2065 The primary hypotheses generated for the economic and cost-effectiveness analyses  
2066 are:

- 2067
- 2068 • Intensive control of blood pressure compared to standard control will result in  
2069 higher healthcare costs and utilization in the first year due to the greater  
2070 number of office visits, medications, and lab tests likely required to achieve  
2071 the intensive control targets.
- 2072
- 2073 • Intensive control of blood pressure compared to standard control will result in  
2074 lower healthcare costs and utilization over the study period due to decreased  
2075 events and related health costs among intensive control participants.
- 2076
- 2077 • The incremental cost-effectiveness ratio will be  $\leq$ \$100,000/Quality Adjusted  
2078 Life Years (QALY) gained when compared to the standard intervention.
- 2079

## 2080 7.3. Health-Related Quality of Life Measures

### 2081 7.3.1 Rationale for Selection

2082  
2083 The SPRINT HRQL instruments were selected based upon the following criteria:  
2084 (1) inclusion of the major dimensions shown in the literature to be affected by  
2085 hypertension and its treatment; (2) brevity; (3) responsiveness to treatment-related  
2086 changes, and (4) appropriateness for the age range, racial/ethnic diversity, and  
2087 anticipated medical conditions of the participants in SPRINT.

2088  
2089  
2090 To reduce participant burden, some HRQL instruments will be administered to the entire  
2091 SPRINT sample, while others will be administered only in a subsample of participants.  
2092 All HRQL instruments will be self-administered unless participants require assistance  
2093 due to sensory, motor, or cognitive deficits in which case the instruments will be  
2094 administered by clinic staff or family/friends accompanying the participant to the clinic  
2095 visit. For Spanish-speaking participants, Spanish versions of all HRQL instruments will  
2096 be administered to participants at all assessment points who indicate at baseline that

2097 they do not have sufficient written English fluency to complete the instruments in  
2098 English.

2099

### 2100 **7.3.2 Health-Related Quality of Life (HRQL) Measures**

2101

2102 **Veterans RAND 12-item (VR-12) questionnaire.** The VR-12 is a shorter version of the  
2103 VR-36 (which is derived from the SF-36). Changes of the VR-12 relative to the SF-12  
2104 have lowered the floor and ceiling, improved the distributional properties, increased  
2105 reliability, and improved discriminant validity of the physical and mental health summary  
2106 scores. Validated conversion formulas allow for direct comparisons to prior studies  
2107 using the SF-36 or SF-12. The VR-12 will be administered to all SPRINT participants at  
2108 baseline and at annual visits thereafter, as well as at the close-out visit.

2109

2110 **Fall Self-Efficacy Scale International (FES-I)** The FES-I, shortened version, consists  
2111 of seven items which the respondent answers on a 1-4 scale, indicating level of concern  
2112 for falling. The activities are getting dressed or undressed, taking a bath or shower,  
2113 getting in or out of a chair, going up or down stairs, reaching for something above your  
2114 head or on the ground, walking up or down a slope, and getting out to a social event. An  
2115 evaluation of the Short FES-I found good internal and 4-week test-retest reliability. The  
2116 correlation between the Short FES-I and the FES-I was 0.97. The Short FES-I will be  
2117 administered among a subsample of SPRINT participants.

2118

2119 **International Index of Erectile Function (IIEF)** The IIEF-5 is the 5-item short form of  
2120 the original 15-item IIEF, and was developed specifically for use in clinical settings to  
2121 supplement physical examination and patient history. IIEF-5 scores can be classified into  
2122 the following categories; severe erectile dysfunction (ED), moderate ED, mild to  
2123 moderate ED, mild or no ED. Scores less than 21 have 98% sensitivity and 88%  
2124 specificity for the presence of ED. The IIEF-5 will be administered in a male subsample  
2125 of SPRINT participants.

2126

2127 **Female Sexual Function Assessment (FSFI)** The FSFI is a 19-item survey that  
2128 assesses female sexual function over the past four weeks in 6 domains (desire, arousal,  
2129 lubrication, orgasm, satisfaction, and pain). Utilizing recently proposed modifications to  
2130 the FSFI, participants not sexually active over the past four weeks would complete only  
2131 4 items, substantially reducing respondent burden. The FSFI has high internal  
2132 consistency (Cronbach alpha > 0.8). This assessment will be administered in a female  
2133 subsample of SPRINT participants.

2134

2135 **Patient Satisfaction (Bharmal and others, 2009)** A modified Treatment Satisfaction  
2136 Questionnaire for Medication (TSQM) General Satisfaction subscale will be administered  
2137 at baseline (based on current blood pressure medications being taken, if any) and at 1  
2138 and 4 years (or close-out for those participants who have not reached the 48M visit at  
2139 the time of close-out). This corresponds with the administration of the Morisky  
2140 Adherence scale, which will allow for analyses of the relationship between satisfaction  
2141 and adherence at these time points.

2142

2143 **Patient Health Questionnaire-9 (PHQ-9)** The PHQ-9 is a self-report measure of  
2144 depression that has been recommended by the AHA Advisory Panel on Depression and  
2145 Coronary Heart Disease, has a low response burden (9 items; 2-3 minutes to complete),  
2146 excellent reliability, and good sensitivity and specificity with depression diagnoses. This

2147 assessment will be done at baseline, annually, and at the close-out visit on all  
2148 participants.

### 2149 **7.3.3 Health State Utility Measures**

2150 **EQ-5D** is a self-administered 5-item instrument including mobility, self-care, usual  
2151 activities, pain/discomfort and depression. There are three responses to each question  
2152 (no, moderate, or severe limitations). This commonly used measure of health utilities  
2153 will be used to convert quality of life and health status into quality adjusted life-years  
2154 (QALYs) for cost-effectiveness analysis. The EQ-5D will be administered to all  
2155 participants at baseline, annually and at the close-out visit.  
2156  
2157  
2158

## 2159 **7.4. Cost-Effectiveness Assessment**

### 2160 **7.4.1 Rationale**

2161 It is expected that the intensive therapy for hypertension will not only reduce  
2162 cardiovascular events but will be more cost-effective over the long-term. The two primary  
2163 measures of cost-effectiveness are the incremental cost per QALY and life-year gained.  
2164 The primary cost-effectiveness hypothesis is that the intensive blood pressure treatment  
2165 will be cost-effective as compared to the standard treatment. This question will be  
2166 addressed by conducting incremental cost-effective analyses in which the net costs and  
2167 net effectiveness of intensive therapy defined by the main trial to standard therapy will  
2168 be calculated and expressed as a series of ratios.  
2169  
2170

2171 For QALYs, the cost-effectiveness hypothesis is that the ratio of costs per QALY (as  
2172 measured by the EQ-5D) will be significantly less (i.e., more favorable cost-  
2173 effectiveness) for the intensive intervention than for the standard intervention. Costs will  
2174 be discounted to weigh future costs less heavily than present ones.  
2175  
2176

### 2177 **7.4.2 Effectiveness**

2178 The primary endpoints defined by the main trial are considered as primary outcome  
2179 measures for this economic evaluation. The primary effectiveness measures will be life-  
2180 years gained and QALY gained. The measure of life-year gained is determined by the  
2181 difference in number of life-years between intensive therapy and standard therapy.  
2182 QALYs adjust life-years gained by the quality of the participant's overall HRQL during  
2183 these life-years gained.  
2184  
2185

### 2186 **7.4.3 Costs**

2187 All direct medical costs associated with treatment of hypertension and its complications  
2188 and costs for treating adverse effects of the therapy will be considered. These costs will  
2189 include costs of inpatient care, outpatient care, medications, medical equipment,  
2190 supplies, laboratory tests, and professional services. The participant's costs such as  
2191 waiting time, transportation, lodging, and informal care arising from the disease will not  
2192 be included. Likewise, opportunity costs of premature death, productivity loss, and long-  
2193 term disability will not be considered in this study.  
2194  
2195  
2196  
2197

2198 **7.4.3.1 Cost Data Collection**

2199

2200 Hospitalizations are the primary cost drivers in most cost-effectiveness analyses, and  
2201 SPRINT has proposed obtaining hospitalization events via multiple sources. Patient  
2202 report of hospitalizations, along with emergency department (ED) visits, stays in  
2203 rehabilitation facilities, and day-surgery admissions, are obtained every 3 months during  
2204 scheduled SPRINT study visits. Discharge summaries and other pertinent records  
2205 (including reason for hospitalization and length of stay) will be obtained from  
2206 hospitalizations, Emergency Department visits, rehabilitation stays, and day-surgery  
2207 admissions related to outcome events and potential adverse events (including  
2208 cardiovascular, renal, and cerebrovascular disorders; dementia; falls) which will  
2209 constitute many of the admissions that might be expected to differ by arm. Because of  
2210 the large proportion of VA and Medicare patients in SPRINT, we also will be able to  
2211 determine hospitalizations, dates of admission, length of stay, and reason for admission  
2212 via Medicare and VA databases for those hospitalizations for which we do not have  
2213 discharge summaries. For the limited number of remaining patient reports for which we  
2214 have neither discharge summaries nor database information, we will perform regression  
2215 analyses of reported vs. actual length of stay and costs for all those with such data to  
2216 estimate the costs of the undocumented hospitalizations. Cost estimates for  
2217 hospitalizations will be based on DRG-specific Medicare cost weights. For professional  
2218 costs associated with hospitalizations we plan to obtain these costs from Medicare and  
2219 VA databases as available in a subsample and use these data to estimate professional  
2220 costs for the entire sample based on these subsample analyses. We will also explore  
2221 whether these databases allow us to obtain costs associated with ED visits, stays in  
2222 rehabilitation facilities, and day surgery admissions.

2223

2224 **7.4.3.2 Intensive and Standard Therapy Non-Research Costs**

2225

2226 For medications, we plan to use study medication logs to obtain the medications  
2227 prescribed by the study. This log also includes blood pressure lowering medications  
2228 prescribed by other healthcare providers. Medication costs will be estimated using  
2229 median wholesale price. We will obtain information on non-study prescribed  
2230 medications (concomitant medications) from participants annually and will estimate costs  
2231 for these medications based on the most commonly used doses in clinical practice. We  
2232 will not obtain cost data on non-study related labs, as this source of utilization is not  
2233 expected to differ by group. To estimate non-research related costs for the SPRINT  
2234 office visits, we plan to obtain estimated CPT codes (minus research-specific activities)  
2235 from clinic staff for a random subset of these visits to estimate costs via Medicare  
2236 payment rates. Non-study outpatient visits will not be obtained but will be estimated with  
2237 non-study medication costs by age using national health care expenditure data.

2238

2239 **7.4.3.3 Data Analysis for Cost-Effectiveness**

2240

2241 Two methods of cost-effectiveness analysis (CEA) and cost-utility analysis (CUA) will be  
2242 used in the economic evaluation. The ratios of cost to outcome derived from CEA/CUA  
2243 are used to compare cost-effectiveness among treatment strategies. An incremental  
2244 cost-effectiveness ratio (ICER) will be calculated, which provides a summary of the cost-  
2245 effectiveness of one intervention relative to the other.

2246

2247 The basic formula to calculate incremental CEA ratio and CUA ratio of a specific  
2248 treatment A relative to the reference treatment B is presented as following:

2249  
2250  
2251  
2252  
2253  
2254  
2255  
2256  
2257  
2258  
2259  
2260  
2261  
2262  
2263  
2264  
2265  
2266  
2267  
2268  
2269  
2270  
2271  
2272  
2273  
2274  
2275  
2276

$$ICER_{CEA} = \frac{(\text{Mean Cost}_{\text{treatment A}} - \text{Mean Cost}_{\text{treatment B}})}{(\text{Mean Effect}_{\text{treatment A}} - \text{Mean Effect}_{\text{treatment B}})}$$

$$ICER_{CUA} = \frac{(\text{Mean Cost}_{\text{treatment A}} - \text{Mean Cost}_{\text{treatment B}})}{(\text{Mean QALY}_{\text{treatment A}} - \text{Mean QALY}_{\text{treatment B}})}$$

The ratio of incremental cost to incremental effectiveness represents cost-effectiveness of the intensive BP treatment. Bootstrap methods will be used to calculate confidence intervals for cost-effectiveness ratios. All costs will be adjusted to the baseline year using the medical component of the Consumer Price Index. Future costs and outcomes will be discounted by 3%. Estimates of utilization over time will be adjusted for the presence of censored data with variable follow-up. Sensitivity analysis will explore the effect of correlations between costs and outcomes, which will also be empirically examined in the cost and outcome data.

QALYs will be calculated by summing the area under each individual's QALY curve (constructed by plotting the EQ-5D scores for each interview during follow-up). The estimates of mean differences in costs and outcomes – which will be used to create net health benefits and the cost per QALY ratios -- will be derived from multivariable regression analyses. For the evaluation of the difference in costs, the dependent variable in the regression will either be costs or the natural log of costs (determination of the form of the dependent variable will be based on statistical tests of its distribution). If the dependent variable used in the analysis is the log of costs, a smearing retransformation will be used to estimate the absolute difference in costs between the treatment groups.

2277  
2278  
2279  
2280  
2281  
2282  
2283  
2284  
2285  
2286  
2287  
2288  
2289  
2290  
2291  
2292  
2293  
2294  
2295  
2296  
2297  
2298  
2299  
2300  
2301  
2302  
2303  
2304  
2305  
2306  
2307  
2308  
2309  
2310  
2311  
2312  
2313  
2314  
2315  
2316  
2317  
2318  
2319  
2320  
2321  
2322  
2323  
2324  
2325  
2326

## **Chapter 8 – Safety Monitoring and Reporting**

### **8.1 Introduction**

The SPRINT trial is testing whether lowering SBP to a goal of <120 mm Hg results in better outcomes than a goal of <140 mm Hg in patients at risk for CVD events. SPRINT is not a study of specific anti-hypertensive agents. All antihypertensive agents provided by the trial or recommended by SPRINT have been approved by the Food and Drug Administration (FDA) and are routinely prescribed for lowering blood pressure.

Patient safety will be carefully monitored in SPRINT. Each participating investigator has primary responsibility for the safety of the individual participants under his/her care. In addition, an independent Data and Safety Monitoring Board (DSMB) will have primary responsibility for monitoring the accumulating study data for signs of adverse trends in morbidity/mortality and treatment-related serious adverse events.

### **8.2 Participant population**

Participants enrolled in SPRINT have elevated risk for CVD outcomes. Inclusion and exclusion criteria for SPRINT were set in order to maximize safety while facilitating inclusion of a trial population at risk for the major trial outcomes. Exclusions are outlined in Section 3.1.

Potentially Vulnerable populations: The SPRINT population includes a significant proportion of older adults (>75 years), some of whom may become cognitively impaired during the course of the trial. Thus, participants are asked to identify a contact person at the time of enrollment that can provide information about the participant as it relates to the study. In addition, participants with CKD may need care coordination or referral to a nephrologist during the study. Various management issues in patients with eGFR values lower than 30 ml/min/1.73m<sup>2</sup> may arise including dietary issues and the effects of CKD on pharmacokinetics, pharmacodynamics and side-effects of various drugs. All participants, including those with CKD, will be managed according to current national guidelines. If patients with this level of renal impairment are not already followed by a nephrologist and the investigator feels it is needed, he/she will coordinate with the participant's primary care physician regarding the recommendation for renal follow-up.

### **8.3 Safety Monitoring**

Several types of safety issues and serious adverse events may occur in SPRINT and participants will be monitored for these regularly throughout the study.

#### **8.3.1 Expected Events:**

The potential adverse effects of the blood pressure drugs used in SPRINT have been well documented. For example, electrolyte abnormalities (hyponatremia or hypokalemia are known to be associated with diuretics; hyperkalemia and short-term decline in GFR with RAAS blockers, hyperkalemia with potassium-sparing drugs; as well as bradycardia with beta blockers and calcium channel blockers). Participants will be monitored routinely with interviews, vital signs, targeted physical examination and laboratory tests to ensure safety (Chapter 5, Table 5.1). In addition, site clinicians may also obtain local

2327 labs and ECG's if safety is a concern at non-scheduled intervals. Clinical alerts are  
 2328 generated when safety parameters are exceeded. (Table 8.1). Expected events are not  
 2329 considered serious adverse events (SAEs) unless they meet criteria for an SAE (see  
 2330 8.3.2).

2331  
 2332  
 2333

Table 8.1 Clinical Safety Alerts

| Measure                      | Alert Value                                                                                             |
|------------------------------|---------------------------------------------------------------------------------------------------------|
| Serum sodium                 | < =132 or >150 mEq/L                                                                                    |
| Serum potassium              | <3.0 or >5.5 mEq/L                                                                                      |
| Serum creatinine             | Increase by at least 50% to a value $\geq$ 1.5 mg/dL since the last study lab (usually 6 months apart). |
| Heart rate                   | <40                                                                                                     |
| ECG                          | acute MI, complete heart block, or bradycardia <40 bmp                                                  |
| PHQ-9<br>(depression screen) | Positive response to question on suicidal ideation                                                      |
| Dementia<br>Assessment       | Adjudicated dementia                                                                                    |

2334  
 2335

### 8.3.2 Adverse Events and Serious Adverse Events

2336  
 2337  
 2338  
 2339  
 2340  
 2341  
 2342  
 2343  
 2344  
 2345  
 2346  
 2347

An adverse event (AE) is defined as any untoward or unfavorable medical occurrence in a human subject, including any clinically significant abnormal sign (for example, abnormal physical exam or laboratory finding), symptom, or disease, temporally associated with the subject's participation in the research, whether or not considered related to the subject's participation in the research. The burden of collecting and reporting data on every possible AE in SPRINT is excessive and side effects from the drugs to be used in SPRINT have been well defined in previous studies. Therefore, in SPRINT, sites will report all serious adverse events and selected AEs to the Coordinating Center.

2348  
 2349

Consistent with NHLBI guidelines and OHRP policy, SAEs are adverse events that meet any of the following criteria:

2350  
 2351  
 2352  
 2353  
 2354  
 2355  
 2356  
 2357  
 2358

- fatal or life-threatening,
- result in significant or persistent disability,
- require or prolong hospitalization,
- result in a congenital anomaly/birth defect, or
- are important medical events that investigators judge to represent significant hazards or harm to research participants and may require medical or surgical intervention to prevent one of the other outcomes listed in this definition (e.g. hospitalization, death, persistent disability).



2359 Any adverse event that meets any of these criteria will be documented and reported as a  
2360 serious adverse event. In addition, a select list of other important events (see manual of  
2361 procedures for details and definitions), regardless of whether they resulted in  
2362 hospitalization, will also be considered SAEs in SPRINT, including:

- 2363 • Injurious falls
- 2364 • Syncope
- 2365 • Unexpected events for which the investigator believes that the SPRINT  
2366 intervention caused the event or contributed to the immediate cause of the  
2367 event

2368  
2369 Participants will be queried for SAEs and selected AEs at quarterly clinic visits.  
2370

### 2371 **8.3.3 Modification of treatment in response to safety concerns**

2372  
2373 SPRINT is testing two different SBP treatment goals. The study physician may add,  
2374 increase or reduce the dose, stop, or change antihypertensive drugs in the interest of  
2375 participant safety. Depending on the situation, the change may be temporary or  
2376 permanent. Situations that may require temporary reduction or elimination of a study  
2377 medication include: side effects, worsening congestive heart failure, acute kidney injury,  
2378 symptomatic hypotensive episodes, and other illnesses. Orthostatic hypotension is  
2379 usually related to specific drug classes and not BP level per se and thus should NOT  
2380 usually alter target blood pressure goals. The MOP contains a section on management  
2381 of symptomatic orthostatic hypotension.

## 2382 2383 **8.4 Safety Reporting**

### 2384 2385 **8.4.1 Clinical Safety Alerts**

2386  
2387 Clinical Safety Alerts (section 8.3.1. and Table 8.1) are provided to the site clinician for  
2388 his/her action. When any laboratory measurement attains a defined alert level, the  
2389 Central Laboratory will immediately notify the clinical site and the CCN. Site clinicians  
2390 may also obtain local labs if safety is a concern at non-scheduled intervals. Site  
2391 clinicians are responsible for timely review of all labs drawn locally and when central lab  
2392 results become available. ECGs will be done at specified visits and read by the ECG  
2393 reading center. However, if a participant has one of a short list of abnormalities (reported  
2394 on the ECG by the machine), such as acute MI, complete heart block, or bradycardia  
2395 <40 beats/minute, the ECG will be reviewed by the site clinician immediately (see ECG  
2396 section of the SPRINT MOP).

### 2397 2398 **8.4.2 Serious Adverse Events**

2399  
2400 At each quarterly visit, SPRINT staff will specifically query participants for serious  
2401 adverse events. In addition, information on serious adverse events may also be reported  
2402 to study staff spontaneously by participants through telephone calls or emails between  
2403 study visits. In addition to local reporting requirements, all serious adverse events will  
2404 be recorded by clinic staff and forwarded to the CC Medical Safety Officer **within 72**  
2405 **hours** of knowledge of the event. SAEs will be collected and reported from screening to  
2406 the end of the study follow-up period for an individual participant. SAEs will be followed  
2407 until resolution, stabilization, or until it is determined that study participation is not the  
2408 cause.  
2409

2410 The Coordinating Center will be responsible for timely reporting to the NIH and the  
2411 DSMB. The Coordinating Center will provide reports of serious adverse events for  
2412 review by the DSMB at their meetings.  
2413

## 2414 **8.5 Data Safety Monitoring Board**

2415  
2416 A **Data Safety Monitoring Board (DSMB)** is established, with responsibility to monitor  
2417 all aspects of the study. The **Medical Safety Officer** reports to the DSMB for issues  
2418 related to participants' safety. This independent Data and Safety Monitoring Board will  
2419 be established to monitor data and oversee participant safety. Members will be  
2420 appointed by the NHLBI to provide oversight of the trial and its ancillary studies. The  
2421 SPRINT DSMB may include experts in cardiovascular medicine (particularly  
2422 hypertension), kidney disease, clinical trials, geriatrics, biostatistics, quality of life, cost  
2423 effectiveness, cognitive function and other areas as needed. DSMB participants include  
2424 the Steering Committee Chair and Vice-Chair, CC PI and senior staff, and  
2425 representatives from the NHLBI and other NIH sponsors. The DSMB normally meets  
2426 twice a year to monitor safety, to advise the NHLBI about study progress and  
2427 performance, and to make recommendations to the NHLBI regarding study continuation  
2428 and protocol changes. In addition, the CC may provide data to the DSMB Chair to  
2429 ensure early identification of any major adverse outcomes of therapy. The DSMB has  
2430 the responsibility to recommend to the NHLBI whether the trial should continue, whether  
2431 the protocol should be modified, or whether there should be early termination. The  
2432 DSMB will provide reports to the NHLBI through the Executive Secretary, who will be  
2433 appointed by the NHLBI. Recommendations by the DSMB must be approved by the  
2434 NHLBI prior to implementation.  
2435

2436  
2437

## 2438 **Chapter 9 – Clinical Outcome Measures**

2439

### 2440 **9.0 Outcomes**

2441

2442 This chapter describes the SPRINT primary and secondary clinical outcomes. Clinical  
2443 events occurring during follow-up will be ascertained primarily through surveillance of  
2444 self-reported events, laboratory, and ECG data collected by the study and classified by  
2445 members of the Morbidity and Mortality subcommittee masked to treatment assignment.  
2446 Additional sources, including searches of the National Death Index (NDI), will also be  
2447 used to augment follow-up data.

2448

### 2449 **9.1 Primary Outcome**

2450

2451 The primary outcome measure for SPRINT will be major CVD events, defined as the  
2452 composite endpoint comprised of the first occurrence of a

2453

- fatal or non-fatal myocardial infarction (MI),
- non-MI acute coronary syndrome (non-MI ACS),
- fatal or non-fatal stroke,
- fatal or non-fatal heart failure (HF), or
- death attributable to cardiovascular disease (CVD).

2454

2455

2456

2457

2458 MI and non-MI ACS are defined in Section 9.1.1; stroke is defined in Section 9.1.2; HF is  
2459 defined in Section 9.1.3, and CVD death is defined in Section 9.1.4. The SPRINT  
2460 Manual of Procedures contains the full details of these definitions.

2461

#### 2462 **9.1.1 MI and Non MI ACS**

2463

2464 **9.1.1.1 MI:** Defined as the death of part of the myocardium due to an occlusion of a  
2465 coronary artery from any cause, including spasm, embolus, thrombus or rupture of a  
2466 plaque. SPRINT will use standard case definitions for both fatal and nonfatal MI based  
2467 on the combination of symptoms, elevation in biomarkers, and/or ECG findings. The  
2468 algorithm for classifying MI includes elements of the clinical presentation (signs and  
2469 symptoms), results of cardiac biomarker determinations, and ECG readings, and is  
2470 based on a 2003 Scientific Statement (Luepker and others, 2003). The definition  
2471 includes MI that occurred during surgery/procedure and MI aborted by thrombolytic  
2472 therapy or procedure. SPRINT adjudicators will be guided by specific, pre-specified  
2473 definitions and operational rules. Adjudicators will use their clinical interpretation of the  
2474 ECGs and other available evidence for the event to classify MI cases as definite,  
2475 probable, or possible, with all included in the primary outcome (Luepker and others,  
2476 2003). MI will be ascertained both from adjudication of hospital records for clinical  
2477 events and also from the finding of new significant Q waves from the standardized  
2478 interpretation of the study visit-obtained ECG (silent or unrecognized MI). MIs that  
2479 present clinically will include Q wave, ST elevation and non-ST elevation infarctions  
2480 (segment elevation myocardial infarction (STEMI) and Non-ST Segment elevation  
2481 myocardial infarction (NSTEMI), as well as aborted MI and post-intervention MI.

2482

2483 **9.1.1.2 Non-MI ACS:** Defined as hospitalization for evaluation and treatment of an  
2484 accelerating or new symptom pattern consistent with coronary artery insufficiency  
2485 without meeting the definition of MI, but requiring evaluation to rule-out MI on clinical  
2486 presentation. Non-MI ACS in SPRINT will also require objective findings of coronary  
2487 ischemia, including any of the following: history of previous catheterization with

2488 significant obstruction or previous revascularization; significant obstructive lesion(s) on  
2489 coronary catheterization during index hospitalization and/or intervention for  
2490 revascularization; ischemic ECG changes or imaging findings on exercise or  
2491 pharmacologic stress testing associated with the index hospitalization; or resting ECG  
2492 findings consistent with ischemia occurring with symptoms during the index  
2493 hospitalization.

2494

### 2495 **9.1.2 Stroke**

2496

2497 **9.1.2.1 Stroke:** SPRINT will use standard case definitions for both fatal and nonfatal  
2498 stroke. Stroke will be defined based on all available data, including symptoms and  
2499 signs, imaging of the brain and large vessels, and cardiac testing, e.g.,  
2500 echocardiography. Adjudicators will use their clinical judgment based on the available  
2501 evidence to classify each case, and will be guided by pre-specified definitions and  
2502 operational rules. Stroke is generally defined as neurological deficit of cerebrovascular  
2503 cause that persists beyond 24 hours or is interrupted by death within 24 hours (World  
2504 Health Organization, 1978 Cerebrovascular Disorders (Offset Publications). Geneva:  
2505 World Health Organization. ISBN 9241700432. Exclusionary conditions for stroke  
2506 include major brain trauma, intracranial neoplasm, coma due to metabolic disorders or  
2507 disorders of fluid or electrolyte balance, peripheral neuropathy, or central nervous  
2508 system infections. Stroke will be classified as brain infarction, subarachnoid  
2509 hemorrhage, intraparenchymal hemorrhage, other hemorrhage, other type, or unknown  
2510 type. In SPRINT, brain infarction (ischemic stroke) is defined as a new lesion detected  
2511 by computed tomography or magnetic resonance imaging or, in the absence of a new  
2512 lesion on available imaging, clinical findings consistent with the occurrence of stroke that  
2513 lasted for more than 24 hours (N Engl J Med 2001;345:1444-51). Brain infarctions will  
2514 be further sub-typed using the Causative Classification of Stroke system as evident,  
2515 probable, or possible cases of large artery atherosclerosis, cardio-aortic embolism, small  
2516 artery occlusion, other causes, and undetermined causes (Ay and others,  
2517 2007). Strokes following invasive cardiovascular interventions will also be classified as  
2518 such.

2519

### 2520 **9.1.3 HF**

2521

2522 **9.1.3.1 HF:** Defined as hospitalization, or emergency department visit requiring treatment  
2523 with infusion therapy, for a clinical syndrome that presents with multiple signs and  
2524 symptoms consistent with cardiac decompensation/inadequate cardiac pump function.  
2525 Adjudication will use the ARIC study adjudication system (Rosamond and others, 2009).  
2526 The SPRINT HF outcome will include definite or possible acute decompensation,  
2527 including HF with preserved left ventricular ejection fraction as well as HF with reduced  
2528 ejection fraction. HF cases may also be adjudicated as chronic stable HF but this is not  
2529 considered a SPRINT outcome. In SPRINT, HF will include a variety of clinical  
2530 presentations, including acute or subacute HF as the primary reason for hospital  
2531 admission or for emergency department visit where HF was diagnosed and intravenous  
2532 treatment was given. The identification and classification of HF cases will rely on  
2533 multiple pieces of key clinical data as well as adjudicators' clinical judgment, guided by  
2534 specific, pre-specified definitions and operational rules. No identification of HF should  
2535 rely on a single piece of data such as the presence of dyspnea or of edema, a low  
2536 ejection fraction, or an increased brain natriuretic peptide (BNP) value. Adjudicators will  
2537 use both the data available and clinical judgment to distinguish between "definite" and  
2538 "possible" decompensated HF. "Definite" decompensated HF will be assigned when

2539 decompensation is clearly present based on available data (satisfies criteria for  
2540 decompensation). “Possible” decompensation will be assigned when decompensation is  
2541 possibly but not definitively present, typically where the presence of co-morbidity could  
2542 account for the acute symptoms (chronic obstructive pulmonary disease (COPD)  
2543 exacerbation, for example).  
2544

2545 For participants with advanced CKD with or without chronic dialysis, the ascertainment  
2546 of HF can be particularly difficult, since the fluid overload can be purely the consequence  
2547 of fluid retention by the kidney or absence of kidneys. Under these circumstances, the  
2548 adjudicators will again use their best judgment, utilizing all available information.  
2549

#### 2550 **9.1.4 CVD Death**

2551  
2552 **9.1.4.1 CVD Death:** SPRINT will use standard case definitions for classification of CVD  
2553 death. Definite CVD events will be defined based on temporal relationship to a  
2554 documented event (e.g., hospitalization for MI or for stroke), or postmortem findings of  
2555 an acute CVD event. Probable coronary heart disease (CHD) death (Luepker, 2003) will  
2556 be defined based on autopsy findings consistent with chronic CHD, prior history of CHD  
2557 or documented symptoms consistent with CHD prior to death, and the absence of  
2558 another likely cause of death. Possible fatal CHD will be adjudicated based on death  
2559 certificate information consistent with an underlying CHD cause and no evidence of a  
2560 non-coronary cause. Stroke deaths will be categorized based on the temporal  
2561 relationship between the stroke event and death, in cases where the underlying cause of  
2562 death is attributed to stroke. Proximal stroke death is a death attributed to stroke and  
2563 occurring within 30 days of stroke; remote stroke death is underlying cause attributed to  
2564 stroke and more than 30 days from stroke to death. Other forms of CVD death will also  
2565 be adjudicated and include ruptured abdominal aortic aneurysm, and documented  
2566 arrhythmia.  
2567

#### 2568 **9.2 Secondary Outcomes**

2569  
2570 In addition to the primary outcome, SPRINT will assess additional clinical outcomes in  
2571 order to more fully evaluate the relative effects of treating to a SBP goal lower than the  
2572 currently recommended goal. In order to do so, data will be collected on secondary and  
2573 other trial outcomes. Main secondary outcomes are included in the analysis plan in  
2574 Chapter 10.  
2575

2576 **9.2.1 Main secondary cardiovascular composite outcome:** The main secondary  
2577 composite outcome of SPRINT is comprised of the first occurrence of any of the  
2578 components of the primary outcome and all cause mortality. A major and analogous  
2579 secondary outcome of CVD-free survival, defined as survival without any of the primary  
2580 or secondary CVD outcomes, will also be examined because of the significant proportion  
2581 of elderly in the trial and the public health importance of the issue of CVD in that age  
2582 group. All cause mortality and components of the primary outcome will also be  
2583 examined.  
2584

2585 **9.2.2 Main secondary renal outcome:** The main secondary renal outcome of SPRINT  
2586 will be the composite of a 50% decrease in eGFR or development of ESRD requiring  
2587 chronic dialysis or kidney transplantation. This outcome applies to the CKD subgroup  
2588 only.  
2589

2590 **9.2.3 Main secondary cognitive outcomes:** SPRINT MIND will evaluate the incidence  
2591 of all-cause dementia as adjudicated by an expert panel as the most important outcome  
2592 for the MIND study. The second most important outcome is cognitive impairment among  
2593 the Extensive Cognitive Assessment Battery participants will be tested with the full  
2594 assessment battery (6.4.1.3 and 6.6.2). Each test score from the full assessment  
2595 battery will be classified as indicating “impairment (1)” or “no impairment (0)” based on  
2596 norms. A sum of impairment scores will be calculated indicating the total number of  
2597 impairments. Detailed definitions of these outcomes are contained in chapter 6.  
2598

2599 **9.2.4 Additional secondary outcomes:** In addition to the secondary outcomes  
2600 specified in Chapter 10, other outcomes will also be examined separately and combined  
2601 with other outcomes in composites (e.g., CVD-free survival defined above):

- 2602 • Peripheral arterial disease, including carotid and peripheral revascularization,  
2603 abdominal aortic aneurysm repair, and other objectively defined PAD events
- 2604 • Coronary revascularization
- 2605 • Transient Ischemic Attack (TIA): TIA in SPRINT will be defined as one or more  
2606 transient episodes of the sudden onset of a focal neurological deficit, no lesion on  
2607 brain imaging consistent with the deficit, and no signs or symptoms consistent with  
2608 seizures, migraine, or other non-vascular causes.
- 2609 • ECG diagnosed Left Ventricular Hypertrophy (LVH): ECG-diagnosed LVH will be  
2610 defined primarily using the sex-specific Cornell voltage criteria. Other ECG-LVH  
2611 criteria mentioned in the American Heart Association (AHA)/American College of  
2612 Cardiology (ACC) statement on ECG changes associated with cardiac chamber  
2613 hypertrophy (Hancock and others, 2009) will be also considered.
- 2614 • Atrial fibrillation or flutter: In SPRINT, atrial fibrillation/flutter will be primarily detected  
2615 from the scheduled study ECGs using Minnesota ECG classification (Minnesota  
2616 code 8.3). Other sources of detection include hospital discharge ICD code (ICD-10  
2617 code 148 or ICD-9 code 427.3) and self-report.
- 2618 • Other renal outcomes
  - 2619 ○ Incident CKD, defined as a >30% decrease in eGFR and an end value of <60  
2620 ml/min/1.73M<sup>2</sup>. This outcome applies only to the non-CKD subgroup. This  
2621 decrease in eGFR requires a confirmatory value in the next available official  
2622 SPRINT lab check.
  - 2623 ○ Incident albuminuria, defined as a doubling of urinary albumin-to-creatinine  
2624 (ACR) ratio from a value <10 mg/g to a value of >10 mg/g. This outcome  
2625 applies to CKD and non-CKD subjects. This increase in ACR requires a  
2626 confirmatory value in the next available official SPRINT lab check.

2627  
2628  
2629  
2630  
2631

## 2632 **Chapter 10 – Statistical Considerations**

2633

2634 The SPRINT Trial has a single primary objective and several key secondary objectives,  
2635 some of which will be addressed within a number of subgroups whose target size has  
2636 been guided by power computations. The primary objective is to determine whether the  
2637 intensive BP treatment strategy will, when compared to a standard BP treatment  
2638 strategy, reduce the incidence of serious cardiovascular events, defined as MI, stroke,  
2639 heart failure, non-MI acute coronary syndrome or other cardiovascular death. This will  
2640 be tested in all SPRINT participants.

2641

2642 The key secondary objectives are to determine whether the intensive BP strategy  
2643 reduces the incidence of:

- 2644 1) total mortality,
- 2645 2) progression of CKD,
- 2646 3) probable dementia,
- 2647 4) cognitive impairment, and
- 2648 5) white matter lesions detected by MRI.

2649

2650 The primary analysis of each of these objectives will be in different groups of  
2651 participants. The analysis plan to address the primary and each secondary objective is  
2652 described below, followed by estimates of the required sample size for each.

2653

### 2654 **10.1 Analysis Plan**

2655

2656 This section describes some of the key pre-specified analyses directed at the study's  
2657 primary and key secondary objectives. Many other outcomes and measurements, such  
2658 as blood pressure, adverse event experiences, health related quality of life, cost, and  
2659 results of assays performed on blood and urine specimens will also be analyzed.

2660

#### 2661 **10.1.1 Analysis of the Primary Outcome in all Randomized Participants**

2662

2663 The primary analysis will apply Cox proportional hazards regression (Cox, 1972) to all  
2664 randomized participants to compare the time from randomization to the first occurrence  
2665 of the primary CVD composite endpoint between the randomized BP groups. The model  
2666 will include an indicator for intervention arm as its sole predictor variable. Clinical site at  
2667 randomization will be a stratifying factor. Follow-up time will be censored at the last date  
2668 of event ascertainment. The p-value from the primary analysis will be based on the chi-  
2669 square statistic from a likelihood ratio test obtained from proportional hazards models  
2670 with and without the term for intervention arm. This likelihood ratio test will constitute the  
2671 primary test of statistical significance for the primary analysis.

2672

2673 Primary comparisons of intervention groups will be performed according to the intention-  
2674 to-treat principle. All randomized participants in these analyses will be grouped  
2675 according to their intervention assignment at randomization, regardless of adherence.

2676

#### 2677 **10.1.2 Secondary analyses supporting the primary analysis**

2678

2679 **10.1.2.1 Secondary outcomes.** A number of secondary outcomes will be analyzed to  
2680 clarify the interpretation of the results of the primary analysis. These will include:

2681

- a) all myocardial infarction,

- 2682 b) all stroke,
- 2683 c) non-MI acute coronary syndrome,
- 2684 d) all heart failure,
- 2685 e) CVD mortality,
- 2686 f) total mortality, and
- 2687 g) a composite of total mortality and the primary composite outcome (i.e. major
- 2688 CVD event- free survival).
- 2689

2690 Each of these will be analyzed using a proportional hazards model as described for the  
2691 primary analysis. These will be reported with 95% confidence intervals and nominal p-  
2692 values without an adjustment for multiple comparisons, since the intent is to articulate a  
2693 pattern of effects closely related to the primary outcome, rather than to provide additional  
2694 tests of efficacy.

2695  
2696 **10.1.2.2 Subgroup analyses.** In addition to the analysis of the secondary outcomes  
2697 described above, a set of analyses will be reported to explore whether intervention  
2698 effects on the primary and confirmatory secondary outcomes are consistent across  
2699 subgroups of interest. These subgroups are:

- 2700 a) CKD (defined as eGFR < 60 at randomization) vs. non-CKD,
- 2701 b) senior vs. non-senior (aged  $\geq 75$  at randomization vs. aged <75),
- 2702 c) male vs. female,
- 2703 d) black vs. non-black,
- 2704 e) with and without a history of CVD at randomization (as defined in Chapter 3), and
- 2705 f) tertiles of systolic blood pressure at baseline.
- 2706

2707 The subgroups defined by CKD, age and race are motivated by biologically plausible  
2708 hypotheses. For each subgroup analysis, a proportional hazards model will be used that  
2709 is similar to the one described for the primary analysis above, but with additional terms  
2710 identifying subgroup membership and the intervention by subgroup interaction. The  
2711 nominal p-value for the interaction term using a likelihood ratio test will be reported along  
2712 with within subgroup estimates of the intervention effect and associated nominal 95%  
2713 confidence intervals. We will report the Hommel adjusted p-values for the interaction  
2714 effects.

### 2715 2716 **10.1.3 Non-cardiovascular clinical outcomes**

#### 2717 2718 **10.1.3.1. Acute vs. chronic effects of intervention**

2719  
2720 It is possible that the intervention will have some acute adverse effects due to under-  
2721 perfusion of various organs, notably the kidney and the brain, which are major targets of  
2722 SPRINT. In the long term, however, lower SBP may protect these organs from  
2723 hypertension-related damage. We will examine the possibility of acute effects as part of  
2724 the data monitoring plan, particularly if differential adverse effects are observed early in  
2725 the trial; we also will examine the possibility of acute effects as part of the data analysis  
2726 at the end of the trial.

#### 2727 2728 **10.1.3.2 Renal outcomes**

2729  
2730 Renal outcomes are of particular importance in SPRINT, both to assess the incidence of  
2731 new kidney disease among participants free of CKD at baseline and to assess the  
2732 progression of kidney disease among those with CKD at baseline. Because some



2733 outcomes are more interpretable in either people with CKD or without CKD at baseline,  
2734 some analyses will be restricted to these subgroups.

2735  
2736 The primary hypothesis for the renal outcomes is whether, in the subgroup with CKD at  
2737 baseline, the rate of a composite of a 50% decrease in eGFR or ESRD undergoing  
2738 chronic dialysis or kidney transplantation is lower in the intensive intervention arm. The  
2739 decline in eGFR must be seen on two visits at least three months apart. This will be  
2740 analyzed using a proportional hazards model as described for the primary CV analysis.

2741  
2742 A number of additional analyses related to this hypothesis will also be performed. These  
2743 will include:

- 2744 a) incident CKD in the non-CKD subgroup, defined as a 30% decline from baseline  
2745 eGFR to a value of  $<60 \text{ mL/min/1.73m}^2$  (observed on two visits at least 3 months  
2746 apart. There must be a decrease of at least 30% AND the end value of this  
2747 decrease must be  $<60 \text{ mL/min/1.73m}^2$  in order to satisfy this endpoint criterion) or  
2748 ESRD
- 2749 b) incident albuminuria, defined as a doubling of urinary albumin-to-creatinine  
2750 (ACR) ratio from a value  $<10 \text{ mg/g}$  to a value of  $>10 \text{ mg/g}$ . This outcome applies  
2751 to CKD and non-CKD subjects. This increase in ACR must be observed at two  
2752 visits at least 3 months apart.

2753  
2754 *Subgroup analyses.* Analyses of the renal outcomes will be by CKD and non-CKD  
2755 strata. Within each strata, assessments of the renal composite endpoint will be by  
2756 subgroups. The analytical approach will be the same as for the primary CV analysis as  
2757 described in 10.1.2.2. The renal subgroups are:

- 2758 a) urinary albumin/creatinine ratio ( $>300 \text{ mg/g}$  and  $\leq 300 \text{ mg/g}$ ),
- 2759 b) black vs. non-black,
- 2760 c) senior vs. non-senior (aged 75+ at randomization vs. aged  $<75$ ),
- 2761 d) male vs female,
- 2762 e) eGFR (median split)

2763 The subgroups defined by albumin/creatinine ratio, age and race are motivated by  
2764 biologically plausible hypotheses. The main renal outcome composite is defined  
2765 differently for the CKD and non-CKD strata, so that these will be separate analyses.

### 2766 2767 **10.1.3.3 Dementia and cognitive outcomes.**

2768  
2769 The primary outcome for SPRINT MIND will be the first identification of adjudicated  
2770 dementia. Cox proportional hazards models (as described above for the SPRINT  
2771 primary outcome) will be used to compare the time from randomization to the first  
2772 identification of dementia between the two treatment arms. All participants will be  
2773 screened for dementia at baseline.

2774  
2775 *Secondary analyses.* Secondary analyses in the areas of cognitive function, small  
2776 vessel ischemic disease (SVID) lesion load, and mild cognitive impairment will also be  
2777 performed to support the primary analysis.

2778  
2779 *Cognitive Function.* A cognitive assessment battery will be administered at baseline and  
2780 2 and 4 years post-randomization and at the close-out visit (if the year 4 testing has not  
2781 been completed) in a subsample of 2800. The primary outcomes will be composite  
2782 scores for two domains: 1) Memory, consisting of the Hopkins Verbal Learning Test,  
2783 Logical Memory and the Modified Rey Osterrieth Figure, and 2) Processing Speed,

2784 consisting of Trails Making Tests and Digit Symbol Coding Test. Changes in impairment  
2785 over time will be compared between the two treatment arms.

2786  
2787 Supporting analyses will also be conducted on the effect of the interventions on  
2788 individual domains of memory over 48 months. Follow-up test scores will be compared  
2789 using mixed-effects analysis of covariance models (Laird, 1982). Mixed-effects models  
2790 allow for departure from linearity in the relationship between the outcome and time.  
2791 Estimates of the difference in mean levels of the outcome between control and  
2792 intervention groups will be obtained using maximum likelihood techniques. Sensitivity of  
2793 results to missing data will be investigated through the use of multiple imputation  
2794 techniques (Rubin, 1987).

2795  
2796 *Magnetic Resonance Imaging (MRI)*. Other than age, hypertension is the strongest  
2797 correlate of SVID. Total SVID lesion load including abnormal white matter, abnormal  
2798 gray matter and abnormal basal ganglia will be the SPRINT measure of total SVID lesion  
2799 load. Differences in total SVID lesion between treatment groups at 48 months will be the  
2800 main outcomes of the MRI component. Furthermore, differences in total brain volume  
2801 will also be compared after 48 months. These measures are continuous and will be  
2802 analyzed using mixed effects analysis of covariance models as described above.

2803  
2804 *Mild Cognitive Impairment (MCI)*. This outcome is defined as the time to the first of two  
2805 consecutive occurrences of MCI. Analytical methods used for dementia will be applied  
2806 to the analyses of MCI, in those free of MCI at baseline. Furthermore, these same  
2807 methods will be applied to the analyses of the first cognitive impairment defined as the  
2808 first event classified either as MCI or dementia in those free of MCI at baseline.

2809  
2810 *Subgroups*. Analyses of the cognitive outcomes will also explore the intervention effects  
2811 within subgroups. The analytic approach will be the same as for the primary CV analysis  
2812 as described in 10.1.2.2. The subgroups are:

- 2813 a) CKD (defined as eGFR < 60 at randomization) vs. non-CKD,
- 2814 b) senior vs. non-senior (aged 75+ at randomization vs. aged <75),
- 2815 c) male vs. female,
- 2816 d) black vs. non-black,
- 2817 e) with and without a history of CVD at randomization (as defined in Chapter 3),
- 2818 f) tertiles of systolic blood pressure at baseline,
- 2819 g) MCI at baseline (yes vs. no),
- 2820 h) orthostatic hypotension (yes vs. no).

2821  
2822 The subgroups of CKD, age, and MCI are motivated by biologically plausible  
2823 hypotheses.

#### 2824 2825 **10.1.4 Other analyses**

2826  
2827 We expect to explore fully the rich set of data that SPRINT will obtain. Exploratory  
2828 analyses of biologically plausible subgroups are of particular interest. Some of these will  
2829 be further articulation of supporting subgroup analyses described above, such as  
2830 analysis of continuous baseline factors as continuous variables rather as pre-specified  
2831 categorical variables. Other analyses will involve baseline variables that are not listed  
2832 in the pre-specified subgroup but which may modify treatment effect, such as diastolic  
2833 blood pressure or presence of the metabolic syndrome.

2834

2835 **10.1.5 Missing data**

2836

2837 Consistent with an intention-to-treat analysis, we will categorize all participants by their  
2838 randomization group, regardless of compliance, in our primary analyses. For those  
2839 participants lost to follow-up, we plan to use all available information until the time of  
2840 death or loss to follow-up.

2841

2842 Our approach to handling missing outcomes in clinical trials is consistent with the  
2843 opinion of Molenberghs and Kenward (2007, p9), who state that while ignorable,  
2844 missing-at-random (MAR) analyses are reasonable for the primary analysis, exploration  
2845 of the sensitivity of conclusion to the MAR assumption may include models which allow  
2846 for missingness that is not random. If loss to follow-up is related to the level of the  
2847 outcome being analyzed (e.g. as often occurs when analyzing health related outcomes),  
2848 then results obtained under the assumption of independent loss to follow-up may be  
2849 biased. The magnitude of this problem will be investigated by using measurements  
2850 taken at previous visits to predict loss to follow-up. Variables determined to predict loss  
2851 to follow-up will be included in our predictive models in order to satisfy the conditions  
2852 described by Little and Rubin (1987) for the data to be considered MAR. Maximum  
2853 likelihood techniques will be used to estimate parameters. If necessary, other  
2854 approaches may be examined in consideration of how robust the results will be and  
2855 whether they provide appropriately conservative estimates for the trial.

2856

2857 In order to explore the possibility of a relationship between ESRD and CV outcomes, we  
2858 will conduct sensitivity analyses which treat ESRD as a censoring point for the primary  
2859 outcome. This exploration may include an auxiliary composite outcome combining the  
2860 events in the primary outcome and ESRD.

2861

2862 Robustness of inferences to missing outcome data will be further explored in sensitivity  
2863 analyses. These analyses will include examination of several “worst-case” scenarios,  
2864 including opposite and pooled imputation approaches (Wittes, Lakatos & Probstfield  
2865 1989; Proschan et al., 2001). These types of scenarios are members of a broad class  
2866 that can be parameterized as pattern mixture models (Little 1993) and allow for  
2867 examination of sensitivity of conclusions to missing-not-at-random (MNAR) mechanisms  
2868 (Mohlenberg and Kenward, 2007).

2869

2870 The MRI substudy involves two assessments—one at baseline and one at 48 months—  
2871 in 640 participants, thus limiting the range of analytic strategies. We recommend using  
2872 maximum likelihood based general linear models for analyzing outcomes. Intracranial  
2873 volume will be included as a covariate. The validity of the MAR assumption can be  
2874 improved by including baseline covariates that predict missingness. If loss to follow-up  
2875 is related to the unobserved cognitive outcome then our results may be biased. Again,  
2876 some modeling and sensitivity analysis options may be considered if necessary.

2877

2878 **10.2 Sample Size Estimation and Power Calculations**

2879

2880 **10.2.1 Primary Outcome**

2881

2882 We have assumed a 2.2 %/yr event rate of the primary outcome in the standard group, a  
2883 20% effect size for the intervention (hazard ratio of 0.8), a two-year uniform recruitment  
2884 period, a total study length of 5 years and 10 months, a 2 %/yr rate of loss to follow-up,  
2885 and a two-sided test at the 5% level. With these assumptions, power for a variety of

2886 sample sizes is presented in Table 1. Power is also presented for hazard ratios of 0.78  
 2887 and 0.82 and for event rates of 2.0 and 2.4 %/yr. A sample size of 9250 provides high  
 2888 power for a hazard ratio of 0.8 (representing a 20% effect) and a 2.2 %/yr event rate.  
 2889 This sample size would also provide over 80% power for an effect of 18% (hazard ratio  
 2890 of 0.82) with an event rate of 2.2 %/yr and would have reasonable power of 77.3% even  
 2891 with a smaller than assumed event rate of 2.0 %/yr and an 18% effect. Depending on  
 2892 the observed event rate and treatment effect, the table below shows that sample sizes of  
 2893 8500 to 10000 would be consistent with study goals.  
 2894

| Table 1: Power for the SPRINT primary outcome. |             |             |             |             |             |             |             |             |             |
|------------------------------------------------|-------------|-------------|-------------|-------------|-------------|-------------|-------------|-------------|-------------|
|                                                | Event Rate  |             |             |             |             |             |             |             |             |
|                                                | 2.0 %/yr    |             |             | 2.2 %/yr    |             |             | 2.4 %/yr    |             |             |
| N\Hazard Ratio                                 | 0.78        | 0.8         | 0.82        | 0.78        | 0.8         | 0.82        | 0.78        | 0.8         | 0.82        |
| 8500                                           | 89.4        | 82.7        | 73.7        | 91.9        | 85.9        | 77.6        | 93.9        | 88.6        | 80.9        |
| 8750                                           | 90.3        | 83.7        | 75.0        | 92.6        | 86.9        | 78.7        | 94.5        | 89.5        | 82.0        |
| 9000                                           | 91.0        | 84.7        | 76.1        | 93.3        | 87.8        | 79.8        | 95.0        | 90.3        | 83.0        |
| <b>9250</b>                                    | <b>91.7</b> | <b>85.7</b> | <b>77.3</b> | <b>93.9</b> | <b>88.7</b> | <b>80.9</b> | <b>95.5</b> | <b>91.0</b> | <b>84.0</b> |
| 9500                                           | 92.4        | 86.6        | 78.3        | 94.4        | 89.4        | 81.9        | 95.9        | 91.7        | 85.0        |
| 9750                                           | 93.0        | 87.4        | 79.4        | 94.9        | 90.2        | 82.9        | 96.4        | 92.4        | 85.9        |
| 10000                                          | 93.6        | 88.2        | 80.4        | 95.4        | 90.9        | 83.8        | 96.7        | 93.0        | 86.7        |

2895  
 2896 If the event rate in the standard therapy arm is substantially less than 2.2%, we may ask  
 2897 that the DSMB consider recommending a two year extension of the trial.  
 2898

### 2899 10.2.2 Summary

2900  
 2901 For the primary outcome under the assumptions detailed below, with 9250 participants,  
 2902 the SPRINT study is designed to have

- 2903 • 88.7% power to detect a treatment effect of 20% of intensive blood pressure control compared with standard blood pressure control,
- 2904 • 81.9% power to detect a treatment effect of 20% of intensive blood pressure control compared with standard blood pressure control among participants with estimated glomerular filtration rates of <60 ml/min/1.73m<sup>2</sup> at baseline,
- 2905 • 84.5% power to detect a treatment effect of 25% of intensive blood pressure control compared with standard blood pressure control among participants at least 75 years old at baseline,
- 2906 • 96% power to detect a 20% effect and 80% power to detect a 15% effect for incident dementia, the primary outcome for SPRINT MIND.

2907  
 2908  
 2909  
 2910  
 2911  
 2912  
 2913  
 2914 These estimates of power are valid under the following assumptions:

- 2915 • The primary outcome for SPRINT is a composite of fatal CVD, MI, stroke, heart failure, and non-MI acute coronary syndrome.
- 2916 • The event rate for this composite outcome is
  - 2917 ○ 2.2 %/yr in the standard BP arm,
  - 2918 ○ 4 %/yr among participants with eGFR <60 ml/min/1.73m<sup>2</sup>, and
  - 2919 ○ 3.5 %/yr among participants ≥75 years old.
- 2920 • The event rate for the SPRINT MIND primary outcome of incident dementia is 3.1%/yr.
- 2921 • There are
  - 2922 ○ 9250 participants in SPRINT,

- 2925 ○ 4300 participants with eGFR < 60 ml/min/1.73m<sup>2</sup>, and
- 2926 ○ 3250 participants ≥75 years old.
- 2927 • Participants are recruited uniformly over 2 years.
- 2928 • Minimum follow-up is 3 years, 10 months which assumes that closeout visits
- 2929 occur uniformly over a 4 month period.
- 2930 • Two-sided tests at the 0.05 level are used.
- 2931 • Annual loss to follow-up is 2 %/yr (3 %/yr for incident dementia).

2932 Additional computational details and a justification for the assumed event rates are  
 2933 included in the appendix.

2934  
 2935  
 2936 **10.2.3 Power for the MIND primary outcome**

2937  
 2938 Power for the MIND primary outcome is presented in Table 10.2 for a range of event  
 2939 rates with 9250 participants, 5 years and 10 months of follow-up, 2 years of recruitment,  
 2940 and 3 %/yr loss to follow-up. Details of the event rate estimation are given in Appendix  
 2941 3.

2942

| Table 10.2. Power for the SPRINT MIND primary outcomes. |                   |      |      |      |      |
|---------------------------------------------------------|-------------------|------|------|------|------|
|                                                         | Event Rate (%/yr) |      |      |      |      |
| Hazard Ratio                                            | 3.1               | 3.2  | 3.3  | 3.4  | 3.5  |
| 0.80                                                    | 96.3              | 96.7 | 97.1 | 97.4 | 97.7 |
| 0.85                                                    | 79.0              | 80.2 | 81.3 | 82.4 | 83.4 |

2943  
 2944

2945 **10.3 Statistical Reports**

2946 **10.3.1 Steering Committee Reports**

2947  
 2948 Periodic reports will be generated for the Steering Committee, CCNs and Clinical Sites.  
 2949 These reports will include information on recruitment, loss to follow-up, adherence,  
 2950 baseline covariate information on the comparability of treatment groups, and adverse  
 2951 events. Information will be stratified by CCNs and Clinical Sites. Other reports will  
 2952 include information on quality control for central facilities and data entry.

2953

2954 **10.3.2 Data and Safety Monitoring Board Reports**

2955  
 2956 The role and composition of the Data and Safety Monitoring Board are described  
 2957 elsewhere (Chapter 13.6). Meetings of the DSMB will be held at least annually. Material  
 2958 for these meetings will be distributed two weeks in advance of the meetings. Up-to-date  
 2959 statistical analyses will be provided to the DSMB in preparation for their meetings. The  
 2960 analyses will include data on recruitment, outcome measures, any side-effects or safety  
 2961 concerns, adherence, and quality control, and will be designed in cooperation with the  
 2962 DSMB. Interim analyses of the intervention effectiveness will be performed at times  
 2963 coinciding with the meetings of the DSMB, and will be controlled to protect the overall  
 2964 Type I error of the trial. These results will be for the use of the DSMB and will not be  
 2965 revealed to the investigators. The purpose of these analyses will be for the DSMB to  
 2966 assess the trial progress with respect to intervention efficacy and safety, for possible  
 2967 recommendations regarding early termination of the trial.

2968

2969 We will work with the DSMB to finalize the monitoring plan. We include here a potential  
 2970 starting point for those discussions.

2971 Interim analyses will be performed periodically for the DSMB. Monitored parameters will  
2972 include the following:  
2973 1. SBP separation between groups  
2974 2. SBP distribution within groups  
2975 3. Primary outcome results  
2976 4. Adverse events  
2977 5. Laboratory alerts  
2978 6. Recruitment progress  
2979 7. Other event rates, and event rates by subgroups  
2980 8. Enrollment overall and by subgroups such as level of eGFR and CKD category  
2981

2982 Sequential monitoring and early stopping. Incidence rates of outcomes will be monitored  
2983 throughout the trial and used for interim analyses of efficacy and futility. Group  
2984 sequential methods for event rates will be used to control the Type I error to be 0.05  
2985 across these repeated analyses. Critical values for interim testing will be defined based  
2986 on an O'Brien-Fleming type bound and will use a spending function to allow flexibility in  
2987 the number and timing of interim analyses. Information time will be defined based on the  
2988 expected number of events under the null hypothesis. With this approach, interim tests  
2989 early in the trial are conservative and the reduction in the overall power of the trial  
2990 caused by interim testing is small. If needed, conditional power calculations will be used  
2991 to assess the futility of continuation in the presence of a negative treatment effect.  
2992

2993 The monitoring plan will include consideration of the hypothesis that early adverse  
2994 effects may occur and then be followed by long-term beneficial effects. Because kidney  
2995 function will be measured at baseline, 1, 3, and 6 months, we will be able to analyze the  
2996 acute impact of our intervention on kidney function. Because of the study design,  
2997 episodes of acute kidney injury (AKI) that are of more than a transient nature will be  
2998 identified as changes in chronic kidney function, consistent with contemporary  
2999 paradigms acknowledging the interrelationships between AKI and CKD. Episodes of AKI  
3000 will be specifically sought in review of medical records in appropriate patients as adverse  
3001 events. Regarding the possibility of acute cognitive decline, spontaneously reported  
3002 SAEs would be the source of such information.  
3003

3004 At each meeting, the DSMB will review data on adverse events and other safety issues  
3005 to make an overall recommendation to the NIH concerning the safety of continuing  
3006 SPRINT. Consistent with NIH policy, each SPRINT CCN Principal Investigator will  
3007 receive a report summarizing the DSMB review of the adverse event data. Principal  
3008 Investigators are responsible for providing this report to their sites and institutional IRB.  
3009

### 3010 **10.3.3 Website Reports**

3011  
3012 The Coordinating Center will prepare many reports and place them on the SPRINT  
3013 website. These reports enable a user to click on a static link which starts a real-time  
3014 report processed by SAS and returned as output in the user's web browser. These  
3015 reports access live data and run within seconds. Examples of real-time reports on  
3016 randomization and screening activities include: number of clinics actively recruiting,  
3017 percent at target (overall, to date, and by demographic subgroups such as women and  
3018 race/ethnic group). Clinical Sites will have access to live data showing exactly where  
3019 their clinic stands in relation to their recruitment goals and those of the other Clinical  
3020 Sites, as well as projections of activity needed to meet their goals. Committee members

3021 will have expanded access to information across all Clinical Sites for the purpose of  
3022 monitoring recruitment performance for the trial as a whole.  
3023

3024 **Chapter 11 – Data Management**

3025

3026 **11.1 Overview: Use of the World Wide Web**

3027

3028 All Clinical Center Networks and Clinical Sites will use the World Wide Web (WWW) to  
3029 enter SPRINT data collected on forms from participants seen within the Clinical Sites.

3030 Each Clinical Site will have a password protected area on the SPRINT home page  
3031 through which data will be entered. Documentation of the data entry system will be  
3032 maintained at the CC. In addition, training materials for measurement and data entry  
3033 personnel will be available in downloadable format on the SPRINT web site. Site-  
3034 specific reports relating to participant demographics, recruitment goals, etc., among  
3035 other reports, will be available on the web site.

3036

3037 Data security in the web-based data system uses 128-bit encryption and Secure Socket  
3038 Layer (SSL). Once data has been received at the CC, recovery from disasters such as  
3039 natural phenomenon (water, fire, or electrical) is possible through the ability to  
3040 reconstruct both the database management system and the data up to the last back-up  
3041 through the use of nightly backups. This will ensure optimal recovery of data systems in  
3042 the event of a disaster. Back-up tapes are kept in a locked, fire and waterproof storage  
3043 cabinet away from the computer room. Additional back-up tapes will be stored at another  
3044 location on the Wake Forest University Health Sciences campus. CCNs and clinical  
3045 sites have local procedures for back-up and recovery of data following a disaster. As a  
3046 supplement to those plans, the SPRINT CC will have all participant contact information  
3047 to minimize the chance for disruption of communication with participants regarding study  
3048 medications and test results.

3049

3050 **11.2 Flow of Data from Trial Units to Databases**

3051

3052 **11.2.1 Data from Clinical Sites and Clinical Center Networks**

3053

3054 Participant Randomization: SPRINT will use an internet-based, web browser  
3055 randomization procedure. Clinical Sites access the randomization application through  
3056 the study web site. Access to this application is password protected and its  
3057 communications are encrypted. Once security requirements are satisfied, a series of  
3058 questions identify and verify the eligibility of the participant prior to allowing  
3059 randomization of the participant.

3060

3061 Participant Tracking: The Participant Tracking System (PTS) is a fully integrated tracking  
3062 and notification system that advises clinic staff about participant follow-up windows, and  
3063 projects clinic and laboratory workload for a week at a time (longer if necessary).

3064 Tracking a participant begins at screening and continues automatically throughout the  
3065 project by integrating participant follow-up data with predetermined follow-up "windows".  
3066 When a participant is enrolled into the study, a schedule of target dates for each of the  
3067 visits is automatically generated. The report details the recommended "windows" that  
3068 each visit should fall into and a case file is created for the participant.

3069

3070 Data Entry: The images on the data entry screens mirror the data collection forms for  
3071 ease and accuracy of entry. Typically, as participant visits are completed, and hard copy  
3072 forms are filled out, the clinic coordinator reviews each form for accuracy and  
3073 completeness, including laboratory reports and any supporting documentation (hospital



3074 records, etc.). Once any data problems have been resolved, data are entered by clinic  
3075 staff into the computer via the web-based browser application. During data entry, a  
3076 variety of programmed edit checks are performed for key variables. When the edit  
3077 checks fail, data may be flagged for further review or prevented from becoming part of  
3078 the study database. Also, a sample of key forms may be double-keyed for additional  
3079 quality control.

3080

### 3081 **11.2.2 Data from Central Laboratory and ECG Reading Center**

3082

3083 Laboratory specimens and electrocardiographic data are sent to the Central Laboratory  
3084 and ECG Reading Center from the Clinical Sites on a fixed schedule. The Central  
3085 Laboratory and ECG Reading Center provide results to the CC on live internet feed.  
3086 Depending on clinic needs, reports will be sent to assist in the clinical functions (e.g.,  
3087 providing timely feedback to the clinic on any measurement that exceeds a predefined  
3088 alert level).

3089

### 3090 **11.2.3 Central Database Edits**

3091

3092 At regular intervals, data queries will be carried out on the computerized databases at  
3093 the CC to perform consistency checks on key variables and forms. Although much of  
3094 this will have been done at the data entry level in the clinic, this additional pass through  
3095 the data serves as a quality control check.

3096

### 3097 **11.3 Feedback to Clinical Sites and Clinical Center Networks**

3098

3099 Data edit reports will be generated to help ensure that data are entered in timely and  
3100 complete manner. These reports will include both the assessment for each Clinical Site  
3101 of the time between data collection and entry, and the generation of reports by the CC of  
3102 missing items. These reports will be provided to the Clinical Center Networks, Clinical  
3103 Sites, and study committees on a regular basis so that data collection items that are  
3104 troublesome can be identified and Clinical Sites not meeting study standards can be  
3105 notified. CCN Coordinators will have access to all data reports for Clinical Sites within  
3106 their network via the study website and will be asked to follow-up on any action that  
3107 needs to be taken.

3108

### 3109 **11.4 Confidentiality**

3110

3111 The confidentiality of all participant information (including but not limited to any genetic  
3112 analysis) must be protected at the Clinical Sites, the CCNs, and the CC. Paper records  
3113 and computer files must be appropriately safeguarded from unauthorized access.

3114

3115 Paper and/or electronic records for study participants will be stored at the Clinical Sites.  
3116 Copies of records identified by participant identification number pertaining to SAEs and  
3117 study-defined clinical events, including necessary medical records, will be stored at the  
3118 CC. These records will receive the same care as would ordinary medical records. They  
3119 will be stored in locked filing cabinets and/or filing rooms within secure office space or, if  
3120 uploaded through the study website, they are stored in a non-url accessible area that  
3121 can be accessed only through the SPRINT website. Only study personnel who have  
3122 completed SPRINT training in data handling will have access to study forms.

3123

3124 Similar care will be used in the handling of the computer records of study data stored at  
3125 each Clinical Site. Access to the data in any local SPRINT database will be controlled  
3126 by a system of user identification names and passwords. Each Clinical Site staff  
3127 member must complete the SPRINT data handling training program before being given  
3128 an ID and password to use the data system. The privileges allowed to each ID can be  
3129 individually specified by the local CCN Coordinator. All passwords stored within the  
3130 system will be encrypted using SSL encryption.

3131  
3132 Confidentiality of information within the CC will be protected through a variety of  
3133 procedures and facilities:

- 3134
- 3135 1. The confidential nature of the data collected, processed, and stored at the CC is  
3136 explained to all new personnel.
  - 3137
  - 3138 2. All access to CC office space containing data is controlled through a single door,  
3139 which is locked with a keypunch lock. This door remains locked at all times.
  - 3140
  - 3141 3. All participant data sent to the CC is encrypted as described above.
  - 3142
  - 3143 4. All participant data stored on the Wake Forest University's servers are likewise  
3144 encrypted. In addition, all such databases are protected by passwords that must  
3145 be supplied before the data can be accessed.
  - 3146
  - 3147 5. All study documents containing individually identifiable data are produced on  
3148 printers within the CC's secure office space.
  - 3149
  - 3150 6. The CC will obtain a Certificate of Confidentiality for SPRINT, which prevents  
3151 researchers from being forced to disclose identifying information by certain legal  
3152 proceedings.

3153  
3154  
3155  
3156  
3157

3158 **Chapter 12 – Quality Control**

3159

3160 **12.1 Introduction**

3161

3162 Data integrity and quality are among the highest priorities in SPRINT. This feature is  
3163 reflected in the details provided in the protocol regarding initial screening and  
3164 recruitment of participants, data acquisition at baseline and follow-up visits, outcome  
3165 definition and assessments, reading and/or interpretation of the results, and their  
3166 analysis and publication. There are two primary purposes for quality control: to  
3167 document the level of quality and to provide feedback to the clinical, reading and  
3168 laboratory centers in order to maintain and improve the quality of the study data over the  
3169 course of the trial. The Measurement Procedures and Quality Control Committee will  
3170 establish guidelines for quality assurance and quality control, detailed in the Manual of  
3171 Procedures.

3172

3173 Quality control monitoring in SPRINT will involve the CC, the CCN hubs, and various  
3174 SPRINT committees and other groups, although the Measurement Procedures and  
3175 Quality Control Subcommittee will monitor quality control and quality assurance activities  
3176 for the study overall, integrating input from these other groups. For example, the  
3177 Recruitment, Retention and Adherence Subcommittee will monitor progress toward  
3178 achieving recruitment goals, and the SPRINT MIND subcommittee will monitor the  
3179 quality of assessment with the cognitive battery. The CC will generate reports and  
3180 supply them to the CCN hubs for their sites, to the Measurement Procedures and Quality  
3181 Control Subcommittee for all sites and entities, and to other involved groups for the  
3182 activities in their purview. The CCN hubs will be responsible for tracking the  
3183 performance of sites within their Networks, and for following up with their sites on areas  
3184 of concern. The Measurement Procedures and Quality Control Subcommittee will  
3185 conduct monitoring for the trial overall, will raise issues on specific sites and  
3186 communicate them to the CCN hub for follow-up, will monitor the central facilities (ECG  
3187 reading center and central lab), and will report any areas of concern to the Steering  
3188 Committee for consideration, as needed.

3189

3190 This chapter outlines the type of quality assurance activities that will be conducted in the  
3191 SPRINT Trial. Two phrases are used. The first, quality assurance, is the collection of  
3192 manuals and procedures that will be in place to assure the integrity of the data. A  
3193 subset of these procedures is referred to as quality control, which describes the  
3194 monitoring and analytic activities that assess performance during data collection and its  
3195 processing.

3196

3197 **12.2 Manual of Procedures**

3198

3199 As with any multicenter study, standardization of study procedures is very important in  
3200 the SPRINT Trial. The MOP includes the detailed descriptions of all trial procedures.  
3201 This MOP is used for training purposes and as a reference for all study investigators and  
3202 staff. The MOP is an important aspect of efforts to standardize study procedures across  
3203 clinical sites in the SPRINT Trial.

3204

3205 Key study procedures will be standardized; these include the use of a central lab and  
3206 ECG reading center, and standard forms, equipment, and procedures in the clinics for

3207 BP measurement and other data collection procedures. Furthermore, standard event  
3208 definitions and event validation procedures will be used.

3209

### 3210 **12.3 Study Forms and Data Entry Procedures**

3211

3212 Quality assurance concepts were employed during the development of forms. Forms  
3213 can be printed with accompanying question-by-question instructions for easy reference.  
3214 Web-based data entry screens will be developed from the forms, and enable the  
3215 incorporation of range and logical checks at the time of data entry. These features will  
3216 contribute to quality assurance.

3217

### 3218 **12.4 Training**

3219

3220 Training of staff and pilot testing of procedures will be crucial to standardize procedures  
3221 and assure data quality. SPRINT uses two different training models: central training for  
3222 study staff and the train-the-trainer approach. In the central training aspects of the  
3223 SPRINT training effort, all relevant staff members from all clinical sites will be convened  
3224 in a single, centrally administered face-to-face training session. This approach is cost-  
3225 efficient and contributes to uniformity of the training experience and thereby to uniformity  
3226 of data quality across sites. In the train-the-trainer aspect of the SPRINT training effort,  
3227 CCN hub staff will provide training sessions to persons who were unable to attend the  
3228 central training session and to newly hired staff as turnover occurs. In addition, the CCN  
3229 hubs will organize training and refresher training sessions, as needed, including CCN  
3230 remedial training in specific areas targeted by quality control monitoring for a specific  
3231 site.

3232

### 3233 **12.5 Data Queries**

3234

3235 The Coordinating Center will be responsible for data editing, which will include checks  
3236 for missing data, unrealistic values, and crosschecks for inconsistencies. Data will be  
3237 checked on form submission and any data queries presented to the data entry staff for  
3238 immediate resolution, if possible. The CC will also produce data query reports on the  
3239 website that summarize the number and types of queries by clinic and network. Clinical  
3240 center staff will be responsible for reviewing and resolving the data queries in a timely  
3241 manner. Reports, including reports on timeliness of data entry and query resolution, will  
3242 be shared with the Measurement Procedures and Quality Control Subcommittee and the  
3243 corresponding CCN hub investigators and staff for quality control purposes.

3244

### 3245 **12.6 Quality Control Reports**

3246

3247 The Measurement Procedures and Quality Control Subcommittee will develop quality  
3248 indicators, both to document data quality and to provide feedback to individual clinical  
3249 sites, which will be tracked in routine quality control reports in the SPRINT Trial. All  
3250 reports will be generated by the CC and distributed to the Subcommittee, to the  
3251 corresponding CCN hub, and/or to other relevant groups (e.g., the SPRINT MIND  
3252 subcommittee for those measures). Investigators and staff at the CCN hubs will be  
3253 responsible for disseminating reports and feedback to the appropriate investigators and  
3254 staff at the clinics in their networks. These reports will be used to inform discussions  
3255 that will take place during regularly scheduled telephone contacts and site visits.  
3256 Additional information about these processes is contained in the MOP.

3257 Quality Control reports will focus on measures of process, impact, and outcomes.  
3258 Examples of process measures that will be tracked for quality control purposes include:  
3259 1. Days between data collection and data entry  
3260 2. Percent of forms with late data entry  
3261 3. Number of participants with missed or late visits by contact, number of missed  
3262 or late visits clinic-wide, and number of participants missing two or more  
3263 consecutive visits  
3264 4. Number, name and dose of prescribed antihypertensive medications for  
3265 individual participants  
3266

3267 Examples of impact measures that will be tracked for quality control purposes include:  
3268 1. Number (and percent) of participants at goal according to the BP target  
3269 assignment as assessed by in-clinic BP measurements.  
3270

3271 Examples of outcome measures that will be tracked for quality control purposes include:  
3272 1. Submission of medical record documentation for reported study events by the  
3273 clinical site (e.g., timeliness, completeness)  
3274 2. Proportion of participants with ECG submitted to central ECG Reading Center  
3275 overall and by quality grade  
3276 3. Proportion of participants with urine samples submitted for albuminuria  
3277 assessment  
3278 4. Proportion of participants with blood samples submitted to central lab  
3279 5. Percent agreement of individual study adjudicators with the final outcome  
3280 assignments for cases adjudicated  
3281

3282 Details of the various quality control procedures are contained in the Manual of  
3283 Procedures. In general, the CC will generate reports and analyses on progress at the  
3284 clinical sites on an agreed upon schedule appropriate to the study phase. Reports will  
3285 most often be developed at the level of the clinical site but may also include patient-level  
3286 reports by site, technician-level reports by site, and summary reports study-wide and  
3287 within and across CCNs. The CC will supply these reports to the Measurement  
3288 Procedures and Quality Control Subcommittee, to other relevant Subcommittees, and to  
3289 the corresponding CCN hub investigators and staff.  
3290

### 3291 **12.6.1 Deviations from protocol**

3292

3293 Adherence to the study protocol is crucial to collection of high quality data and to the  
3294 internal validity of the trial. Thus, the Intervention Subcommittee will define important  
3295 deviations from the intervention protocol for tracking purposes. A clinic-site-specific  
3296 report describing important protocol deviations will be disseminated by the CC to the  
3297 respective CCNs for quality control purposes. Copies of these reports and a summary  
3298 report describing important protocol deviations and plan for corrective actions on a  
3299 study-wide basis will be shared with the Measurement Procedures and Quality Control  
3300 Subcommittee and the Steering Committee.  
3301

### 3302 **12.6.2 Monitoring the Clinical Centers in the Networks**

3303

3304 Primary responsibility for clinical site monitoring in SPRINT will be assigned to the  
3305 corresponding CCN hub. CCN hub investigators and staff will be responsible for

3306 monitoring performance at each of their clinical sites. The CCN hub monitoring team will  
3307 coordinate research activities of the study within their network and maintain effective  
3308 communications with clinical sites, other clinical center networks, the coordinating  
3309 center, project office and study central units (Central Lab, ECG Reading center, MRI  
3310 Reading Center and Drug Distribution Center). One of the primary roles of CCN hubs is  
3311 to monitor clinical sites in all aspects of trial operations and performance and to assist in  
3312 problem solving related to all aspects of the main study and ancillary studies. Site  
3313 monitoring can and will be performed using regular communications including email,  
3314 conference calls, site visits and other means.

3315

## 3316 **12.7 Site Initiation**

3317

3318 Clinical site initiation to enroll and randomize participants is dependent upon completion  
3319 of a series of preliminary tasks. These include completion of appropriate regulatory  
3320 approvals (IRBs), and letters of agreement. Site staff training, certification, and receipt  
3321 of all study supplies including medications will need to be completed as well as the  
3322 development of a recruitment plan. CCNs will provide the appropriate assistance to their  
3323 clinical sites toward these ends, which may include site visits to ensure that the study  
3324 enrollment and randomization process follows proper study procedures.

3325

## 3326 **12.8 Site Visits**

3327

### 3328 **12.8.1 CCNs to clinical sites**

3329

3330 During the course of the trial, clinical center network personnel will site visit clinical sites  
3331 in their network at specified intervals, and as needed. The scope of these visits is broad  
3332 and can include but is not limited to regulatory requirements, study communications, site  
3333 initiation, site staffing, and general site performance. A minimum standard for all site  
3334 visits content and frequency is detailed in the MOP; however, areas of emphasis and/or  
3335 additional monitoring may vary according to the circumstances of a specific site and site  
3336 visit. Site visits may be conducted to evaluate performance deficits in one or more  
3337 critical areas, such as consistent departures from the protocol or MOP. Site visits are  
3338 also an opportunity for refresher training and/or training of new staff, as needed. Site  
3339 visit frequency and visit procedures can be found in more detail within the appropriate  
3340 section of the MOP.

3341

3342 Site visitors will include CCN hub and site staff and investigators as deemed appropriate.  
3343 As needed, representatives from the coordinating center, project office, other CCNs, and  
3344 study committees may attend these visits.

3345

3346 A summary of the site visit will be presented to the clinical site investigator and staff at  
3347 the conclusion of the site visit. The CCN staff will prepare a written site visit report within  
3348 a reasonable time-frame post visit. Copies of the site visit report will be sent to the  
3349 clinical site investigator, the coordinating center, the project office, and the CCN.  
3350 Additional copies of the site visit report may be requested by other SPRINT Study  
3351 entities.

3352

3353 A sample of site visit reports may be reviewed by the Measurement Procedures and  
3354 Quality Control Committee or other study committees with recommendations for follow-  
3355 up actions and/or reporting changes as needed.

3356

3357 **12.8.2 Coordinating Center to CCN hubs**

3358

3359 The SPRINT Coordinating Center will periodically site visit each CCN hub in order to  
3360 monitor and ensure high performance throughout the trial. Representatives from the  
3361 NIH SPRINT project office (including NHLBI, NIA, NIDDK, and NINDS) and study  
3362 leadership may also attend.

3363

3364 **12.8.3 Project Office to Coordinating Center**

3365

3366 Representatives from the NIH SPRINT project office and study leadership will visit the  
3367 coordinating center in order to monitor and ensure high performance throughout the trial.

3368

3369 **12.9 Laboratory and ECG Center Quality Control**

3370

3371 The SPRINT Measurement Procedures and Quality Control Subcommittee will work with  
3372 the Coordinating Center, the Central Laboratory and the ECG Reading Center to  
3373 develop quality control procedures to ensure high quality data, including monitoring  
3374 clinical site performance as well as performance of the Central Laboratory and ECG  
3375 Reading Center. The results of quality control procedures performed at the Central  
3376 Laboratory and the ECG Reading Center will be reported on a regular basis to the  
3377 Measurement Procedures and Quality Control Subcommittee and by them to the  
3378 Steering Committee.

3379

3380 Core Laboratory for Blood and Urine Assays

3381 Clinical site performance in acquisition, handling, storage and shipping of specimens will  
3382 be tracked by the Central Laboratory and the Measurement Procedures and Quality  
3383 Control Subcommittee. The first step in quality assurance at the site level consists of the  
3384 training and certification process for staff within the clinical sites. Other steps include  
3385 maintaining logs of equipment checks at each clinical site according to the Manual of  
3386 Operations; observation of technicians performing all steps of sample collection and  
3387 processing during site visits; reviewing study forms; reviewing and tracking the condition of  
3388 samples received at the Central Laboratory for problems in shipment; and periodic analysis  
3389 of the study data for participant compliance with fasting, where required, and for signs of  
3390 problems in drawing or processing, such as hemolysis. Reports on clinical center  
3391 performance will be submitted regularly by the Central Laboratory to the CCN hubs and  
3392 the SPRINT Measurement Procedures and Quality Control Subcommittee.

3393

3394 Performance of the Central Laboratory will be monitored regularly by the SPRINT  
3395 Measurement Procedures and Quality Control Subcommittee. Quality Control  
3396 procedures in the laboratory for assays include the use of the internal Laboratory  
3397 Manual, training and certification of Laboratory staff, Laboratory participation in external  
3398 standardization and certification quality control programs, and implementation of the  
3399 SPRINT internal quality control program. Process measures, such as turn-around time  
3400 for the Laboratory reporting back relevant analyte results to the clinical sites, will also be  
3401 monitored. Particular attention will be paid to the feed-back of pre-specified laboratory  
3402 alerts to the Clinical Sites by the Central Laboratories.

3403

3404 As part of the internal quality control program specified in the manual of operations, the  
3405 Central Laboratory will regularly provide summaries of the internal quality control results to  
3406 the Coordinating Center, including the following information for each assay: (1) monthly  
3407 summary statistics (n, mean, and standard deviation) on all quality control pools, including

3408 new pools being overlapped to replace established QC pools; (2) summaries of any  
3409 unusual problems or conditions noted. The SPRINT Measurement Procedures and  
3410 Quality Control Subcommittee will review these reports for evidence of trends with time  
3411 in results on these pools.

3412

3413 ECG

3414 Clinical site performance in acquisition and submission of ECG tracings will be tracked by  
3415 the Reading Center and by the Measurement Procedures and Quality Control  
3416 Subcommittee. The first step in quality assurance at the site level consists of the training  
3417 and certification process. All SPRINT staff acquiring ECGs must be certified, consisting  
3418 of the successful recording and transmission to EPICARE of three successive, adequate  
3419 quality ECGs. The ECG Reading Center will continuously monitor ECG quality and will  
3420 identify errors in acquisition. Each tracing submitted will be graded for quality and used  
3421 to compile continuous quality trend analysis data for each clinical site. Quality control  
3422 grade reports will be regularly submitted to the CCN hubs and to the SPRINT  
3423 Measurement Procedures and Quality Control Subcommittee.

3424

3425 The ECG Reading Center has an internal quality control protocol that monitors  
3426 performance of ECG coding and measurement. This includes regular monitoring of the  
3427 repeatability and accuracy of editing ECG waveforms of the digital (electronic) ECGs,  
3428 and procedures to safeguard against change in trends due to change in ECG reading  
3429 software. The SPRINT Measurement Procedures and Quality Control Subcommittee will  
3430 monitor performance of ECG coding and measurement within the ECG Reading Center  
3431 by regularly reviewing the results of the center's quality control reports.

3432

3433

3434

3435



3436 **Chapter 13 – Study Organization**

3437

3438 **13.1 Overview**

3439

3440 The SPRINT organizational structures and responsibilities are similar to those of other  
3441 large multicenter clinical trials sponsored by government or industry. The National  
3442 Heart, Lung, and Blood Institute (NHLBI) initiated this study, and the National Institute of  
3443 Diabetes and Digestive and Kidney Diseases (NIDDK) is a co-sponsor of the main  
3444 SPRINT trial. The National Institute of Neurological Disorders and Stroke (NINDS) and  
3445 the National Institute on Aging (NIA) are jointly sponsoring the SPRINT MIND study.  
3446 Five Clinical Center Networks and a Coordinating Center work together through the  
3447 Steering Committee to successfully design and conduct the trial (see Figure 13.1). In  
3448 addition, there is a Central Laboratory, an ECG Reading Center, an MRI Reading Center  
3449 and a Drug Distribution Center. Scientific leadership is provided by the Steering  
3450 Committee. External oversight is provided by Institutional Review Boards and a Data  
3451 and Safety Monitoring Board.

3452

3453 **13.2 Clinical Center Networks and Clinical Sites**

3454

3455 SPRINT participants will be recruited, randomized, treated, and followed through a  
3456 system of five CCNs. Each CCN consists of collaborating clinical sites, which are  
3457 medical facilities and/or individual practices involved in the initial evaluation, enrollment,  
3458 treatment and follow-up of participants in the trial. Each CCN and clinical site will be  
3459 responsible for timely recruitment and protocol adherence in accordance with the  
3460 SPRINT protocol and MOP. In addition, the CCNs will contribute to the study's scientific  
3461 leadership and operational management, and each CCN Principal Investigator (PI) will  
3462 participate in Steering Committee and other investigator meetings. The clinical sites will  
3463 collect data at the local level in accordance with the study protocol and the manual of  
3464 operations, and will manage each participant's hypertension treatment. For all  
3465 participants recruited, the CCNs and clinical sites will be responsible for achieving the  
3466 goals specified in the protocol for adherence to study treatment and retention of study  
3467 participants. The CCN will have the primary responsibility for overseeing their clinical  
3468 sites and timely evaluation and correction of recruitment, adherence, and retention  
3469 problems, including development and implementation of alternative strategies to achieve  
3470 the stipulated goals, and funding the related activities. It is anticipated that each CCN  
3471 will conduct periodic site visits within its network of clinical sites to supervise recruitment,  
3472 adherence, and retention activities and to ensure high quality performance. The CCN  
3473 activities will be coordinated with the CC, and may include site visits conducted by the  
3474 CC, along with other organizational components of the study. The CCNs will collaborate  
3475 closely with and assist the CC in implementation and standardization of the protocol  
3476 within its network.

3477

3478 **13.3 The Coordinating Center**

3479

3480 The CC, with input from the SPRINT Steering Committee, will be responsible for  
3481 coordinating protocol writing activities, including protocol drafting and finalization;  
3482 developing and distributing forms and the MOP; training trial personnel in standardized  
3483 protocol implementation and data collection; generating and distributing numerous  
3484 reports (including specific recruitment goals and projections); providing rapid feedback to  
3485 the CCN and Central Units on the quality of data submitted and proposed corrections;

3486 developing and maintaining trial databases and related internal and public websites;  
3487 collecting, managing, and analyzing all trial data; developing and overseeing the web-  
3488 based adjudication of clinical events and endpoints; preparing reports for the DSMB;  
3489 ensuring that the provisions of the manual of operations are carried out by all  
3490 investigating groups; and providing timely and high quality statistical analysis expertise  
3491 as required to prepare presentations and manuscripts. The CC will conduct periodic  
3492 visits to each CCN in order to monitor and ensure high performance throughout the trial.  
3493

3494 The CC will oversee 4 Central Units: the Drug Distribution Center, the Central  
3495 Laboratory, the ECG Reading Center, and the MRI Reading Center.  
3496

3497 The Central Laboratory will serve as a repository for immediate and future analyses of  
3498 urine and blood specimens. The Central Laboratory will be responsible for the  
3499 development and distribution of specific measurement procedures, and laboratory  
3500 analyses, and for participating in quality assurance activities related to laboratory  
3501 measures. Periodic reports will be generated to address sample acquisition quality for  
3502 each clinical site and assay performance, and these will be provided to the CCNs and  
3503 the Measurements, Procedures and Quality Control (MPQC) Subcommittee for review.  
3504

3505 The ECG Reading Center will provide central interpretation of ECGs. The ECG Reading  
3506 Center will develop procedures for obtaining and transmitting ECG data from the clinical  
3507 sites to ensure the highest quality data collection. Periodic reports will be generated to  
3508 address ECG quality for each clinical site, and these will be provided to the CCNs and  
3509 the MPQC for review.  
3510

3511 In collaboration with each CCN participating in the MRI study, the MRI Reading Center  
3512 will identify an MRI site which is located in geographic proximity to the CCN's clinical  
3513 sites. The MRI Reading Center will develop a detailed protocol and manual of  
3514 procedures to ensure that the MRIs taken over time are of the highest quality with the  
3515 smallest variation due to changes in technique and to allow the most precise estimate of  
3516 change over time. The MRI Reading Center will provide training and certification for MRI  
3517 site staff in order to ensure uniformity of methods, and will monitor carefully the quality of  
3518 their work. Working with the CC, the MRI Reading Center will develop an analytical plan  
3519 to estimate as precisely as possible the change in brain MRI over time for each SPRINT-  
3520 MIND-MRI participant. Periodic reports will be generated to address MRI quality for each  
3521 scanning site, and these will be provided to the CCNs and the MPQC for review.  
3522

3523 The Drug Distribution Center will be responsible for developing and implementing plans  
3524 for cost-effective drug acquisition; packaging, labeling, and dispensing drugs according  
3525 to the study protocol; and providing data to the CC for further analyses. The DDC will  
3526 design the technical aspects of drug packaging and labeling to facilitate participants'  
3527 ability to understand and adhere to the drug regimen. The DDC will work with the  
3528 clinical sites and CCNs to develop cost-effective inventory management procedures.  
3529

#### 3530 **13.4 NHLBI Project Office and Other Government Representatives**

3531  
3532 The NHLBI Project Office will be responsible for the scientific conduct and administration  
3533 of SPRINT. Representatives from the Project Office participate in the scientific, general  
3534 organizational and fiscal management of the trial. NHLBI staff includes scientific  
3535 representation from the Project Office team and members of the Office of Acquisitions

3536 and the Office of Biostatistics Research. In addition, the NIH SPRINT team includes  
3537 scientific staff from the NIDDK, the NINDS and the NIA.

3538

### 3539 **13.5 The SPRINT Steering Committee, Executive Committee, Conflict of Interest** 3540 **Committee and the Subcommittees of the Steering Committee**

3541

3542 The SPRINT Steering Committee provides the overall leadership for the study and  
3543 establishes scientific and administrative policy. It is composed of the Principal  
3544 Investigators from the five Clinical Center Networks, the Principal Investigator from the  
3545 Coordinating Center, the NHLBI Project Officer, representatives from NIDDK, NINDS,  
3546 NIA, the Steering Committee Chair, and the Steering Committee Vice-Chair. This  
3547 committee oversees the overall conduct of the trial throughout all phases, develops the  
3548 trial design, prepares the final protocol, and approves the study forms and manual of  
3549 operations. During the data collection phases of the trial, this committee oversees data  
3550 collection practices and procedures to identify and correct deficiencies. The Steering  
3551 Committee also will consider and adopt changes in the study protocol or procedures as  
3552 necessary during the course of the trial.

3553

3554 The SPRINT Steering Committee is chaired by the Steering Committee Chair, who  
3555 serves as the senior executive officer of the investigative group. A Vice-Chair assists  
3556 the Chair with Steering Committee responsibilities. Voting Steering Committee members  
3557 are the Principal Investigators from the five CCNs, the Principal Investigator from the  
3558 Coordinating Center, and the NHLBI Project Officer. If a CCN PI or the CC PI cannot  
3559 make a meeting at which a vote is taken, then the Co-Principal Investigator may vote  
3560 (with the understanding that the Co-PI is fully informed about the issue). The Steering  
3561 Committee Chair, or Vice-Chair in his/her absence, votes only to break a tie. CCN and  
3562 Site Co-investigators and Coordinators, CC staff, NIH staff, consultants, and opinion  
3563 leaders may also be invited to attend meetings.

3564

3565 The SPRINT Executive Committee will oversee the day-to-day operations of the trial as  
3566 an extension of the Steering Committee to ensure efficient and quality performance. The  
3567 members include the Steering Committee Chair, Steering Committee Vice-Chair,  
3568 Coordinating Center personnel, Project Office personnel, and one CCN PI (rotated  
3569 annually so that each PI has the opportunity to serve). Other key study personnel (e.g.,  
3570 Chair of the Operations/Project Coordinators Subcommittee, Director of the DDC) may  
3571 be asked to participate as either ad hoc or regular members.

3572

3573 The SPRINT Conflict of Interest Committee reviews potential conflict of interest issues.  
3574 The NIH Project Office, Steering Committee Chair, and CC PI comprise this committee,  
3575 which has the overall responsibility for the trial's ethical oversight policy and procedures.

3576

3577 There are a number of standing subcommittees and working groups which report to the  
3578 Steering Committee. These subcommittees and groups and their charges are detailed  
3579 in Appendix 5.

3580

### 3581 **13.6 The Data and Safety Monitoring Board**

3582

3583 An independent Data and Safety Monitoring Board will be established to monitor data  
3584 and oversee participant safety. Members will be appointed by the NHLBI to provide  
3585 oversight of the trial and its ancillary studies. The SPRINT DSMB may include experts in  
3586 cardiovascular medicine (particularly hypertension), kidney disease, clinical trials,

3587 geriatrics, biostatistics, bioethics, quality of life, cost effectiveness, cognitive function and  
3588 other areas as needed. DSMB participants include the Steering Committee Chair (who  
3589 is unblinded) and Vice-Chair (who is blinded), CC PI and senior staff, and  
3590 representatives from the NHLBI and other NIH sponsors. The DSMB normally meets  
3591 twice a year to monitor safety, to advise the NHLBI about study progress, including  
3592 contractor performance, and to make recommendations to the NHLBI regarding study  
3593 continuation and protocol changes. In addition, the CC may provide data to the DSMB  
3594 Chair to ensure early identification of any major adverse outcomes of therapy. The  
3595 DSMB has the responsibility to recommend to the NHLBI whether the trial should  
3596 continue, whether the protocol should be modified, or whether there should be early  
3597 termination. The DSMB will provide reports to the NHLBI through the Executive  
3598 Secretary, who will be appointed by the NHLBI. Recommendations by the DSMB must  
3599 be approved by the NHLBI prior to implementation.

3600

### 3601 **13.7 Role of Industry**

3602

3603 Industry may contribute resources to the study and will be acknowledged appropriately.  
3604 However, the scientific decisions and governance of the trial will be determined by the  
3605 Steering Committee, as per NHLBI Policy.

3606

### 3607 **13.8 Conflict of Interest Policy**

3608

3609 The SPRINT investigators have established a policy regarding Conflict of Interest, which  
3610 is presented in the MOP. This policy was developed to meet two goals. First, the  
3611 investigators wished to maintain the confidence that advice was being given, and  
3612 decisions made, in as unbiased and fully informed manner as possible. Second, the  
3613 investigators wished that the processes and results of the trial would meet public  
3614 standards of conduct.

3615

### 3616 **13.9 Timeline**

3617

3618 SPRINT will begin recruiting and randomizing during the fall of 2010. Recruitment will  
3619 continue for approximately two years. The minimum length of participant planned follow-  
3620 up will be four years, and maximum length of follow-up will be approximately six years,  
3621 so the final study visits will occur in late 2016 or early 2017. If the event rate in the  
3622 standard therapy arm is substantially less than 2.2%, we may ask that the DSMB  
3623 consider recommending a two year extension of the trial.

3624

### 3625 **13.10 Ancillary Studies**

3626

#### 3627 **13.10.1 Introduction**

3628

3629 In addition to the main SPRINT protocol, investigators may wish to perform Ancillary  
3630 Studies using the SPRINT population, blood or urine samples, or other collected data.  
3631 An ancillary study is an investigation not initiated by the SPRINT Steering Committee,  
3632 with objectives that are not within the main SPRINT specific objectives and not part of  
3633 the SPRINT protocol but uses SPRINT participants, samples, and/or data collected by  
3634 SPRINT. In most cases, an ancillary study will involve acquisition of additional data that  
3635 are not compiled as part of the SPRINT data set. An ancillary study may or may not use  
3636 all randomized participants. Investigators are encouraged to propose and conduct  
3637 ancillary studies. Such studies enhance the value and productivity of SPRINT and help

3638 ensure the continued interest of the diverse group of investigators who are critical to the  
3639 success of the trial as a whole. These studies provide an exceptional opportunity for  
3640 investigators, either within or outside of SPRINT, to conduct additional projects at  
3641 relatively low cost. In general, ancillary studies will require additional funding from the  
3642 NIH or other sources.

### 3643 3644 **13.10.2 Application Review Process** 3645

3646 To protect the integrity of SPRINT, all ancillary studies must be reviewed and approved  
3647 by the SPRINT Steering Committee before access to SPRINT data, samples, or  
3648 participants is permitted. Investigators will not be allowed access to the SPRINT  
3649 participants, samples, or database without approval. New ancillary study proposals will  
3650 be submitted to the SPRINT Ancillary Science (AS) Subcommittee, which will review all  
3651 ancillary study proposals and make a recommendation to the Steering Committee. In  
3652 the event that investigators wish to modify an ancillary science protocol that has already  
3653 been approved by the SPRINT SC, they will need to first obtain AS Subcommittee and  
3654 SC approval. Ancillary study forms can be obtained by contacting the Coordinating  
3655 Center or accessing the SPRINT website.

3656  
3657 Studies submitted for approval less than four months prior to a funding application  
3658 deadline may not receive timely approval. When the application is complete, the study  
3659 proposal will be sent to the AS Subcommittee for review. The AS Subcommittee will  
3660 have monthly calls to discuss proposals, which will be circulated at least one week prior  
3661 to the calls. After review and approval by the AS Subcommittee, approval/disapproval  
3662 will be made by the Steering Committee. Ancillary Science investigators must include  
3663 one or more SPRINT investigators in their ancillary study proposals.

3664  
3665 The Coordinating Center will usually be responsible for all data management and  
3666 analysis for all ancillary studies. Specialized expertise external to the coordinating  
3667 center (e.g., processing of images) may be needed at the coordinating center's  
3668 discretion. Costs associated with ancillary study data management and analysis must  
3669 be budgeted into each ancillary study, even if the applicants have the necessary  
3670 expertise in data management and analysis.

3671  
3672 Prior to grant submission (or study initiation if no external funding is required), the CCN  
3673 PI must approve participation of sites in her/his network. This is required as the CCN PI  
3674 is responsible for the conduct of all aspects of SPRINT within her/his network. Part of  
3675 this is management and oversight of clinic and participant burden. As needed, the CCN  
3676 will include funding for oversight (e.g., investigator, coordinator, and fiscal personnel  
3677 time, travel). The SPRINT Steering Committee also reserves the right to review the  
3678 burden of ancillary studies on an on-going basis and take appropriate actions as  
3679 necessary. Investigators with approved ancillary studies will report the status of the  
3680 studies annually to the Chair of the AS Subcommittee.

3681  
3682 Additional detail on the review process and criteria for judging proposals can be found in  
3683 the MOP.

### 3684 3685 **13.10.3 Additional Requirements of Ancillary Science Investigators** 3686

3687 All ancillary study investigators will be required to budget adequately for all necessary  
3688 resources for their studies. This includes, but may not be limited to, costs for data

3689 collection, sample collection, sample shipping, sample extraction, sample analysis, data  
3690 entry, website development, data analysis, dataset preparation, data storage and  
3691 publication of results. The final budget may be determined after AS and SC approval.  
3692

3693 Each ancillary study will cause an increase in utilization of main SPRINT study  
3694 resources, particularly by the SPRINT Presentations and Publications (P&P)  
3695 Subcommittee. To help with study operations, each ancillary science proposal team  
3696 should budget for and may be asked to contribute efforts to the main SPRINT study by,  
3697 for example, assigning a person to serve as a reviewer for the P&P Subcommittee.  
3698

3699 Investigators proposing the use of laboratory measurements are encouraged to use the  
3700 SPRINT Central Laboratory if at all possible. This will facilitate sample processing and  
3701 shipping and may reduce the amount of sample required.  
3702

3703 All images (e.g., MRI) or tracings (e.g., ECG) must be available for other investigators to  
3704 use in the spirit of the NIH policy available at <http://grants.nih.gov/grants/sharing.htm>.  
3705 To achieve this goal, ancillary studies must budget for the costs associated with  
3706 archiving these images and making them available to others. If there are legitimate  
3707 reasons why this cannot be accomplished, this can be discussed on a case-by-case  
3708 basis by the investigators, the funding agency, and the SPRINT SC.  
3709

### 3710 **13.11 Publication Policy**

3711  
3712 The purpose of the policy is to encourage and facilitate the presentation and publication  
3713 of SPRINT Study background, rationale, design, and analyses; ensure appropriate use  
3714 of the SPRINT data, timely completion of manuscripts and presentations, equitable  
3715 access to authorship, and adherence to established principles of authorship; and  
3716 coordinate the reporting of trial results. The policy applies to all investigators analyzing,  
3717 presenting, and publishing data from main SPRINT, SPRINT-MIND, SPRINT-Senior  
3718 (hereafter collectively called “SPRINT”) and ancillary studies, except for those using the  
3719 NHLBI Data Repository data (see <https://biolincc.nhlbi.nih.gov/home/>).  
3720

3721 There are several principles underlying this policy:  
3722

- 3723 1. Research questions and hypotheses to be addressed using SPRINT Study data  
3724 should be formulated *a priori* and clearly stated in a manuscript proposal to reduce  
3725 the likelihood that study results are attributable to type I error.  
3726
- 3727 2. Publication of scientific findings from the SPRINT Study should proceed in a timely  
3728 fashion once relevant analyses are complete.  
3729
- 3730 3. The publications arising from the SPRINT Study should avoid overlap and conflicting  
3731 representation of SPRINT Study findings. Overlaps are, however, acceptable for  
3732 review articles.  
3733
- 3734 4. Recognition through authorship will be distributed among the SPRINT investigators  
3735 so that:
  - 3736 i) all SPRINT investigators and team members have equitable opportunity to  
3737 lead and co-author SPRINT publications and, if appropriate, publications from  
3738 ancillary studies;

- 3739           ii) all Ancillary Study investigators have the opportunity to lead and be co-  
3740           authors on publications resulting from their ancillary studies.  
3741  
3742 5. The SPRINT Study should promote the career development of trainees and junior  
3743 faculty by providing them the opportunity to lead and be recognized as co-authors of  
3744 SPRINT publications, as appropriate.  
3745  
3746 6. Standards for authorship on SPRINT publications will adhere to the Uniform  
3747 Requirements for Manuscripts Submitted to Biomedical Journals of the International  
3748 Committee of Medical Journal Editors (NEJM 1997;336:309-315) and those  
3749 established by the destination journals.  
3750  
3751 7. The concept, in the form of a proposal, for all manuscripts must be approved by the  
3752 P&P Subcommittee prior to preparation.  
3753

3754 There are three categories of manuscripts and anticipated authorship:  
3755

- 3756           i) Main results developed based on core SPRINT data and study  
3757           aims/hypotheses (which will bear the corporate authorship, “The SPRINT  
3758           Research Group”). The design and main baseline papers will also be  
3759           corporate authored.  
3760  
3761           ii) Manuscripts developed and authored by investigators using data that are not  
3762           considered to be main SPRINT results.  
3763  
  
3764           iii) Ancillary study results led by investigators bringing external funding or  
3765           resources into SPRINT for a specific project.  
3766  
3767           (1) Unless specific justifications and alternative arrangements are made, all  
3768           SPRINT analyses will be performed by the Coordinating Center (CC), with  
3769           specialized expertise external to the Coordinating Center as needed at  
3770           the Coordinating Center’s discretion. Ancillary study budgets should  
3771           include funds allocated to the CC for that purpose.  
3772  
3773           (2) Ancillary study manuscripts are subject to similar review and tracking  
3774           procedures as other SPRINT manuscripts.  
3775

3776 During the operational phase of the trial, manuscripts proposing to use data other than  
3777 baseline data will be reviewed closely to ensure that the SPRINT study objectives are  
3778 not compromised. In general, the following will not be allowed:  
3779

- 3780           (1) Publication of follow-up data according to randomized group  
3781  
3782           (2) Longitudinal analyses of outcomes pre-specified in the main protocol  
3783

3784 All such proposals will be considered on a case-by-case basis.  
3785

3786 The final responsibility for review and approval of manuscript proposals, including  
3787 composition of writing committees, readiness for submission, and abstracts and material

3788 for presentations at meetings and conferences, rests with the Steering Committee. The  
3789 P&P Subcommittee will oversee and facilitate these processes, assisted by a  
3790 Publications Coordinator based at the Coordinating Center.

3791  
3792  
3793  
3794  
3795  
3796  
3797  
3798  
3799  
3800  
3801  
3802  
3803  
3804  
3805  
3806  
3807  
3808  
3809  
3810  
3811  
3812  
3813  
3814  
3815  
3816  
3817  
3818  
3819  
3820  
3821  
3822  
3823  
3824  
3825  
3826  
3827  
3828  
3829  
3830  
3831  
3832  
3833  
3834  
3835  
3836  
3837  
3838



**Figure 13.1: SPRINT Organizational Chart**

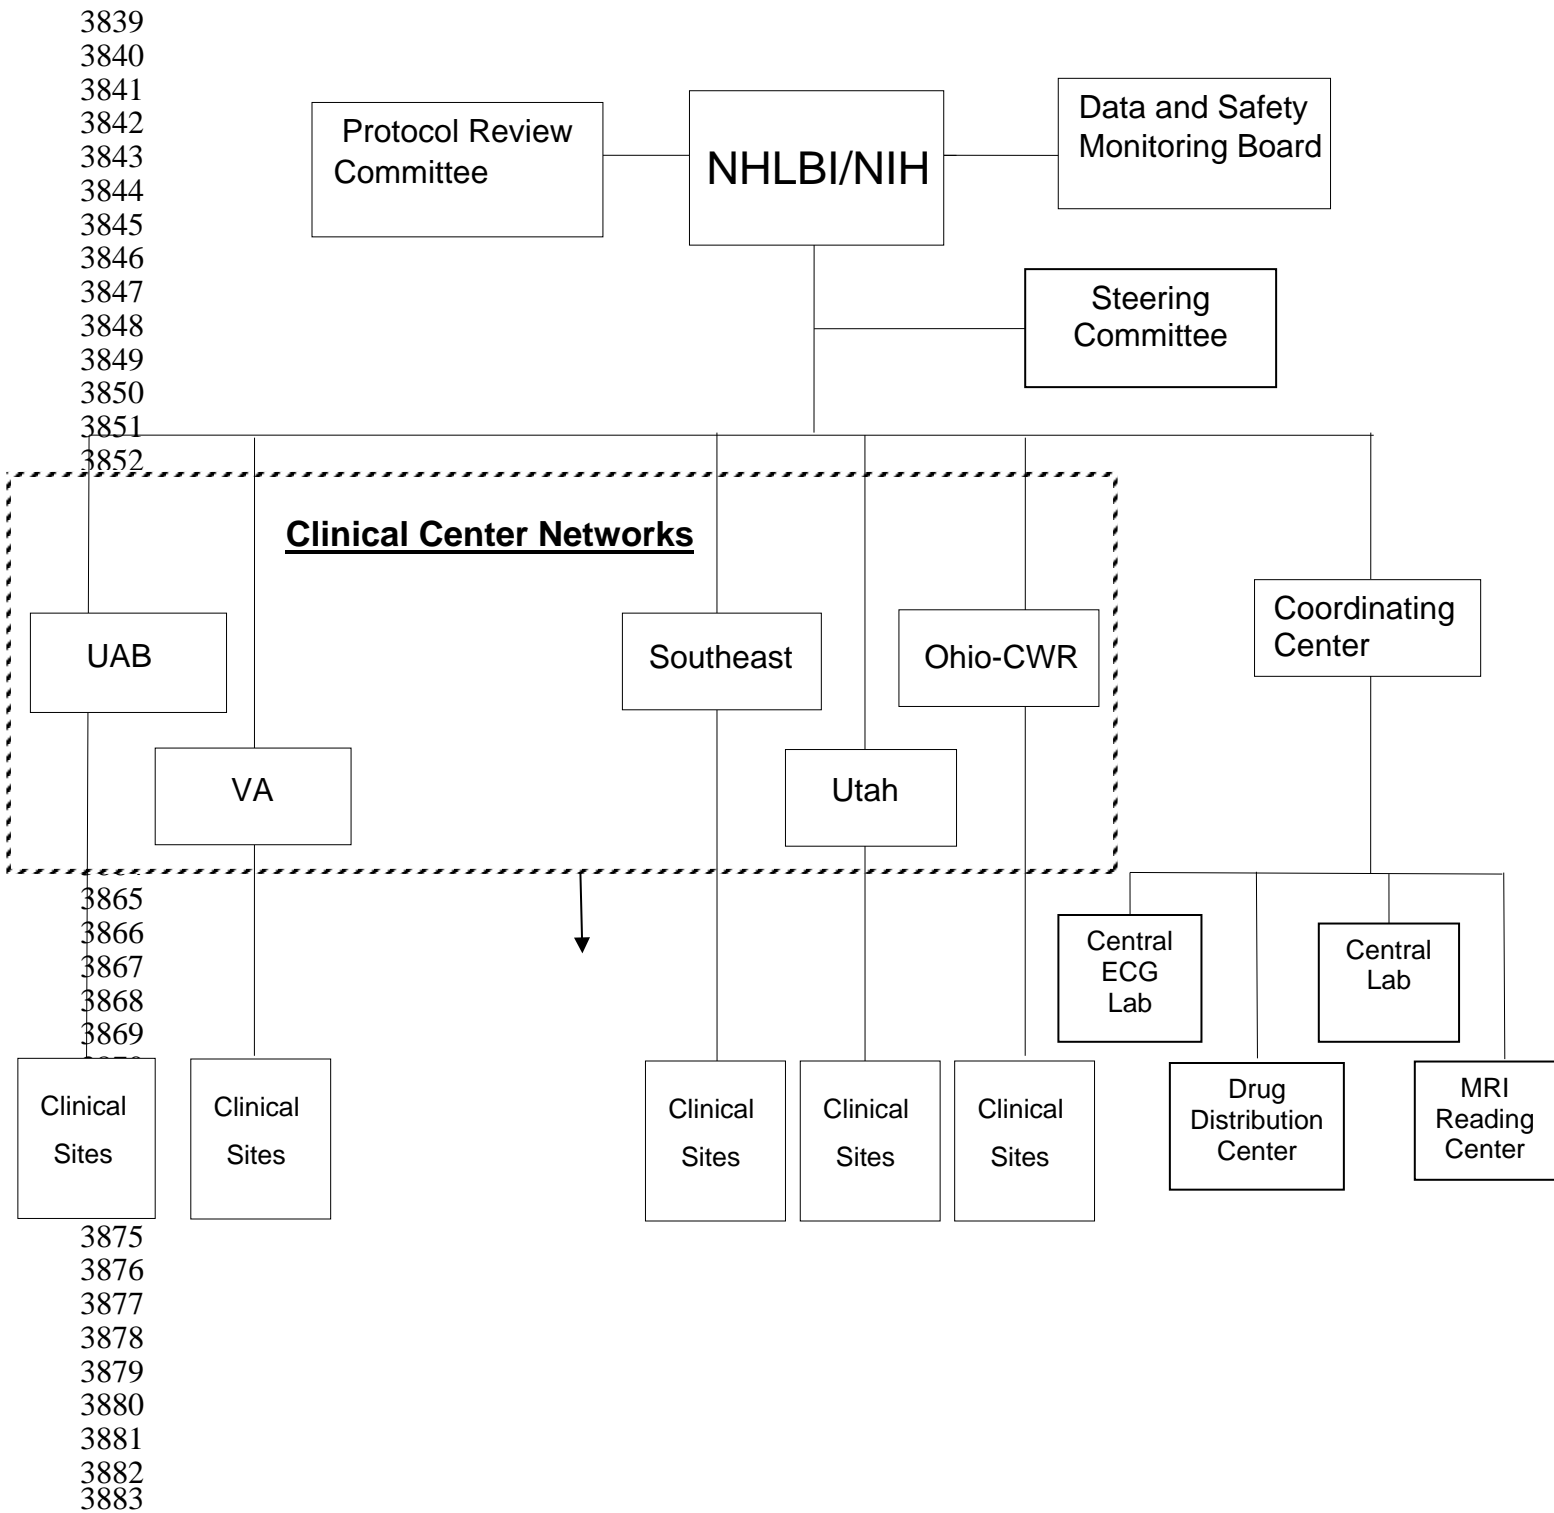

3884  
3885

## Reference List

- 3886 1. **Working Group Report: Expert Panel on a Hypertension Treatment Trial**  
3887 **Initiative Meeting Summary. 2007.**  
3888 **Ref Type: Internet Communication**
- 3889 2. **Abernethy, J., Borhani, N. O., Hawkins, C. M., Crow, R., Entwisle, G., Jones,**  
3890 **J. W., Maxwell, M. H., Langford, H., and Pressel, S., 1986, Systolic blood**  
3891 **pressure as an independent predictor of mortality in the Hypertension**  
3892 **Detection and Follow-up Program: Am.J Prev.Med, v. 2, p. 123-132.**
- 3893 3. **ALLHAT, 2002, Major outcomes in high-risk hypertensive patients**  
3894 **randomized to angiotensin-converting enzyme inhibitor or calcium channel**  
3895 **blocker vs diuretic: The Antihypertensive and Lipid-Lowering Treatment to**  
3896 **Prevent Heart Attack Trial (ALLHAT): JAMA, v. 288, p. 2981-2997.**
- 3897 4. **ALLHAT, 2003, Diuretic versus alpha-blocker as first-step antihypertensive**  
3898 **therapy: final results from the Antihypertensive and Lipid-Lowering**  
3899 **Treatment to Prevent Heart Attack Trial (ALLHAT): Hypertension, v. 42, p.**  
3900 **239-246.**
- 3901 5. **Appel, L. J., Wright, J. T., Jr., Greene, T., Kusek, J. W., Lewis, J. B., Wang,**  
3902 **X., Lipkowitz, M. S., Norris, K. C., Bakris, G. L., Rahman, M., Contreras, G.,**  
3903 **Rostand, S. G., Kopple, J. D., Gabbai, F. B., Schulman, G. I., Gassman, J. J.,**  
3904 **Charleston, J., and Agodoa, L. Y., 2008, Long-term effects of renin-**  
3905 **angiotensin system-blocking therapy and a low blood pressure goal on**  
3906 **progression of hypertensive chronic kidney disease in African Americans:**  
3907 **Archives of Internal Medicine, v. 168, p. 832-839.**
- 3908 6. **Ay, H., Benner, T., Arsava, E. M., Furie, K. L., Singhal, A. B., Jensen, M. B.,**  
3909 **Ayata, C., Towfighi, A., Smith, E. E., Chong, J. Y., Koroshetz, W. J., and**  
3910 **Sorensen, A. G., 2007, A computerized algorithm for etiologic classification**  
3911 **of ischemic stroke - The causative classification of stroke system: Stroke,**  
3912 **v. 38, p. 2979-2984.**
- 3913 7. **Bakris, G. L., Williams, M., Dworkin, L., Elliott, W. J., Epstein, M., Toto, R.,**  
3914 **Tuttle, K., Douglas, J., Hsueh, W., and Sowers, J., 2000, Preserving renal**  
3915 **function in adults with hypertension and diabetes: a consensus approach.**  
3916 **National Kidney Foundation Hypertension and Diabetes Executive**  
3917 **Committees Working Group: Am.J Kidney Dis., v. 36, p. 646-661.**
- 3918 8. **Basile, A. M., Pantoni, L., Pracucci, G., Asplund, K., Chabriat, H., Erkinjuntti,**  
3919 **T., Fazekas, F., Ferro, J. M., Hennerici, M., O'brien, J., Scheltens, P., Visser,**  
3920 **M. C., Wahlund, L. O., Waldemar, G., Wallin, A., and Inzitari, D., 2006, Age,**  
3921 **hypertension, and lacunar stroke are the major determinants of the severity**  
3922 **of age-related white matter changes. The LADIS (Leukoaraiosis and**  
3923 **Disability in the Elderly) Study: Cerebrovasc.Dis., v. 21, p. 315-322.**
- 3924 9. **Beckett, N. S., Peters, R., Fletcher, A. E., Staessen, J. A., Liu, L.,**  
3925 **Dumitrascu, D., Stoyanovsky, V., Antikainen, R. L., Nikitin, Y., Anderson, C.,**

- 3926 Belhani, A., Forette, F., Rajkumar, C., Thijs, L., Banya, W., and Bulpitt, C. J.,  
3927 2008, Treatment of hypertension in patients 80 years of age or older: N Engl  
3928 J Med, v. 358, p. 1887-1898.
- 3929 10. Berl, T., Hunsicker, L. G., Lewis, J. B., Pfeffer, M. A., Porush, J. G., Rouleau,  
3930 J. L., Drury, P. L., Esmatjes, E., Hricik, D., Pohl, M., Raz, I., Vanhille, P.,  
3931 Wiegmann, T. B., Wolfe, B. M., Locatelli, F., Goldhaber, S. Z., Lewis, E. J.,  
3932 and for the Collaborative Study Group, 2005, Impact of Achieved Blood  
3933 Pressure on Cardiovascular Outcomes in the Irbesartan Diabetic  
3934 Nephropathy Trial: Journal of the American Society of Nephrology, v. 16, p.  
3935 2170-2179.
- 3936 11. Berlowitz, D. R., Ash, A. S., Hickey, E. C., Friedman, R. H., Glickman, M.,  
3937 Kader, B., and Moskowitz, M. A., 1998, Inadequate management of blood  
3938 pressure in a hypertensive population: New England Journal of Medicine,  
3939 v. 339, p. 1957-1963.
- 3940 12. Bharmal, M., Payne, K., Atkinson, M. J., Desrosiers, M. P., Morisky, D. E.,  
3941 and Gemmen, E., 2009, Validation of an abbreviated Treatment Satisfaction  
3942 Questionnaire for Medication (TSQM-9) among patients on antihypertensive  
3943 medications: Health Qual.Life Outcomes., v. 7, p. 36.
- 3944 13. Birns, J., Morris, R., Donaldson, N., and Kalra, L., 2006, The effects of blood  
3945 pressure reduction on cognitive function: a review of effects based on  
3946 pooled data from clinical trials  
3947 BIRNS2006: J.Hypertens., v. 24, p. 1907-1914.
- 3948 14. Brandt, J. and Benedict, R. H. B., 2001, Hopkins Verbal Learning Test-  
3949 Revised. Professional manual: Lutz, FL, Psychological Assessment  
3950 Resources, Inc.
- 3951 15. Braunwald, E., Domanski, M. J., Fowler, S. E., Geller, N. L., Gersh, B. J.,  
3952 Hsia, J., Pfeffer, M. A., Rice, M. M., Rosenberg, Y. D., and Rouleau, J. L.,  
3953 2004, Angiotensin-converting-enzyme inhibition in stable coronary artery  
3954 disease: N Engl J Med., v. 351, p. 2058-2068.
- 3955 16. Brookmeyer, R., Corrada, M. M., Curriero, F. C., and Kawas, C., 2002,  
3956 Survival following a diagnosis of Alzheimer disease: Arch.Neurol., v. 59, p.  
3957 1764-1767.
- 3958 17. Calhoun, D. A., Jones, D., Textor, S., Goff, D. C., Murphy, T. P., Toto, R. D.,  
3959 White, A., Cushman, W. C., White, W., Sica, D., Ferdinand, K., Giles, T. D.,  
3960 Falkner, B., and Carey, R. M., 2008, Resistant hypertension: Diagnosis,  
3961 evaluation, and treatment - A Scientific Statement from the American Heart  
3962 Association Professional Education Committee of the Council for High  
3963 Blood Pressure Research: Hypertension, v. 51, p. 1403-1419.
- 3964 18. Calhoun, D. A., Lacourciere, Y., Chiang, Y. T., and Glazer, R. D., 2009, Triple  
3965 Antihypertensive Therapy With Amlodipine, Valsartan, and  
3966 Hydrochlorothiazide A Randomized Clinical Trial: Hypertension, v. 54, p.  
3967 32-39.

- 3968 19. Campbell, N. R., Khan, N. A., Hill, M. D., Tremblay, G., Lebel, M.,  
3969 Kaczorowski, J., McAlister, F. A., Lewanczuk, R. Z., and Tobe, S., 2009, 2009  
3970 Canadian Hypertension Education Program recommendations: the  
3971 scientific summary--an annual update: *Can.J Cardiol.*, v. 25, p. 271-277.
- 3972 20. Chobanian, A. V., Bakris, G. L., Black, H. R., Cushman, W. C., Green, L. A.,  
3973 Izzo, J. L., Jr., Jones, D. W., Materson, B. J., Oparil, S., Wright, J. T., Jr., and  
3974 Roccella, E. J., 2003, The Seventh Report of the Joint National Committee  
3975 on Prevention, Detection, Evaluation, and Treatment of High Blood  
3976 Pressure: the JNC 7 report: *JAMA*, v. 289, p. 2560-2572.
- 3977 21. Coca, S. G., Krumholz, H. M., Garg, A. X., and Parikh, C. R., 2006,  
3978 Underrepresentation of renal disease in randomized controlled trials of  
3979 cardiovascular disease: *JAMA*, v. 296, p. 1377-1384.
- 3980 22. Coker L.H., Hogan P.E., Bryan N.R., and et al. Effects of postmenopausal  
3981 hormone therapy on volumetric sub-clinical cerebrovascular disease: The  
3982 Women's Health Initiative Memory Study - Magnetic Resonance Imaging  
3983 Study (WHIMS-MRI). 2008.  
3984 Ref Type: Unpublished Work
- 3985 23. Collins, R., Peto, R., Macmahon, S., Hebert, P., Fiebach, N. H., Eberlein, K.  
3986 A., Godwin, J., Qizilbash, N., Taylor, J. O., and Hennekens, C. H., 1990,  
3987 Blood pressure, stroke, and coronary heart disease. Part 2, Short-term  
3988 reductions in blood pressure: overview of randomised drug trials in their  
3989 epidemiological context: *Lancet*, v. 335, p. 827-838.
- 3990 24. Coresh, J., Selvin, E., Stevens, L. A., Manzi, J., Kusek, J. W., Eggers, P., Van  
3991 Lente, F., and Levey, A. S., 2007, Prevalence of chronic kidney disease in  
3992 the United States: *JAMA*, v. 298, p. 2038-2047.
- 3993 25. Cox, D. R., 1972, Regression models and life-tables: *Journal of the Royal*  
3994 *Statistical Society, Series B: Methodological*, v. 34, p. 187-220.
- 3995 26. Cruickshank, J. M., 2000, Antihypertensive treatment and the J-curve:  
3996 *Cardiovasc.Drugs Ther.*, v. 14, p. 373-379.
- 3997 27. Cruickshank, J. M., Pennert, K., Sorman, A. E., Thorp, J. M., Zacharias, F.  
3998 M., and Zacharias, F. J., 1987, Low mortality from all causes, including  
3999 myocardial infarction, in well-controlled hypertensives treated with a beta-  
4000 blocker plus other antihypertensives: *J Hypertens.*, v. 5, p. 489-498.
- 4001 28. Cushman, W. C., Ford, C. E., Cutler, J. A., Margolis, K. L., Davis, B. R.,  
4002 Grimm, R. H., Black, H. R., Hamilton, B. P., Holland, J., Nwachuku, C.,  
4003 Papademetriou, V., Probstfield, J., Wright, J. T., Jr., Alderman, M. H., Weiss,  
4004 R. J., Piller, L., Bettencourt, J., and Walsh, S. M., 2002, Success and  
4005 predictors of blood pressure control in diverse North American settings:  
4006 the antihypertensive and lipid-lowering treatment to prevent heart attack  
4007 trial (ALLHAT): *J.Clin.Hypertens.(Greenwich.)*, v. 4, p. 393-404.

- 4008 29. Cushman, W. C., Ford, C. E., Einhorn, P. T., Wright, J. T., Preston, R. A.,  
4009 Davis, B. R., Basile, J. N., Whelton, P. K., Weiss, R. J., Bastien, A.,  
4010 Courtney, D. L., Hamilton, B. P., Kirchner, K., Louis, G. T., Retta, T. M., and  
4011 Vidt, D. G., 2008, Blood Pressure Control by Drug Group in the  
4012 Antihypertensive and Lipid-Lowering Treatment to Prevent Heart Attack  
4013 Trial (ALLHAT): *Journal of Clinical Hypertension*, v. 10, p. 751-760.
- 4014 30. Cushman, W. C., Grimm, R. H., Cutler, J. A., Evans, G. W., Capes, S.,  
4015 Corson, M. A., Sadler, L. S., Alderman, M. H., Peterson, K., Bertoni, A., and  
4016 Basile, J. N., 2007, Rationale and design for the blood pressure intervention  
4017 of the Action to Control Cardiovascular Risk in Diabetes (ACCORD) trial:  
4018 *American Journal of Cardiology*, v. 99, p. 441-551.
- 4019 31. Cutler, J. A., MacMahon, S. W., and Furberg, C. D., 1989, Controlled clinical  
4020 trials of drug treatment for hypertension. A review: *Hypertension*, v. 13, p.  
4021 136-144.
- 4022 32. Cutler, J. A., Sorlie, P. D., Wolz, M., Thom, T., Fields, L. E., and Roccella, E.  
4023 J., 2008, Trends in Hypertension Prevalence, Awareness, Treatment, and  
4024 Control Rates in United States Adults Between 1988-1994 and 1999-2004:  
4025 *Hypertension*, v. 52, p. 818-827.
- 4026 33. Debette, S., Beiser, A., DeCarli, C., Au, R., Himali, J. J., Kelly-Hayes, M.,  
4027 Romero, J. R., Kase, C. S., Wolf, P. A., and Seshadri, S., 2010, Association  
4028 of MRI markers of vascular brain injury with incident stroke, mild cognitive  
4029 impairment, dementia, and mortality: the Framingham Offspring Study:  
4030 *Stroke*, v. 41, p. 600-606.
- 4031 34. DeKosky, S. T., Williamson, J. D., Fitzpatrick, A. L., Kronmal, R. A., Ives, D.  
4032 G., Saxton, J. A., Lopez, O. L., Burke, G., Carlson, M. C., Fried, L. P., Kuller,  
4033 L. H., Robbins, J. A., Tracy, R. P., Woolard, N. F., Dunn, L., Snitz, B. E.,  
4034 Nahin, R. L., Furberg, C. D., and for the Ginkgo Evaluation of Memory  
4035 (GEM) Study Investigators, 2008, Ginkgo biloba for Prevention of Dementia:  
4036 A Randomized Controlled Trial: *JAMA: The Journal of the American*  
4037 *Medical Association*, v. 300, p. 2253-2262.
- 4038 35. Di Angelantonio, E., Danesh, J., Eiriksdottir, G., and Gudnason, V., 2007,  
4039 Renal function and risk of coronary heart disease in general populations:  
4040 new prospective study and systematic review: *PLoS.Med*, v. 4, p. e270.
- 4041 36. Di Bari, M., Pahor, M., Franse, L. V., Shorr, R. I., Ferrucci, L., Wan, J. Y.,  
4042 Somes, G. W., and Applegate, W. B., 2001, Dementia and disability  
4043 outcomes in large hypertension trials: lessons learned from the Systolic  
4044 Hypertension in the Elderly Program (SHEP) Trial: *Am.J.Epidemiol.*, v. 153,  
4045 p. 72-78.
- 4046 37. Dufouil, C., Chalmers, J., Coskun, O., Besancon, V., Bousser, M. G.,  
4047 Guillon, P., Macmahon, S., Mazoyer, B., Neal, B., Woodward, M., Tzourio-  
4048 Mazoyer, N., and Tzourio, C., 2005, Effects of blood pressure lowering on  
4049 cerebral white matter hyperintensities in patients with stroke: the

- 4050           **PROGRESS (Perindopril Protection Against Recurrent Stroke Study)**  
4051           **Magnetic Resonance Imaging Substudy: Circulation, v. 112, p. 1644-1650.**
- 4052           **38. Dufouil, C., Godin, O., Chalmers, J., Coskun, O., Macmahon, S., Tzourio-**  
4053           **Mazoyer, N., Bousser, M. G., Anderson, C., Mazoyer, B., and Tzourio, C.,**  
4054           **2009, Severe cerebral white matter hyperintensities predict severe**  
4055           **cognitive decline in patients with cerebrovascular disease history: Stroke,**  
4056           **v. 40, p. 2219-2221.**
- 4057           **39. Elias, M. F., Wolf, P. A., D'Agostino, R. B., Cobb, J., and White, L. R., 1993,**  
4058           **Untreated blood pressure level is inversely related to cognitive functioning:**  
4059           **the Framingham Study: Am.J.Epidemiol., v. 138, p. 353-364.**
- 4060           **40. Ellis, R. J., Jan, K., Kawas, C., Koller, W. C., Lyons, K. E., Jeste, D. V.,**  
4061           **Hansen, L. A., and Thal, L. J., 1998, Diagnostic validity of the dementia**  
4062           **questionnaire for Alzheimer disease: Arch.Neurol., v. 55, p. 360-365.**
- 4063           **41. Ernst, M. E., Carter, B. L., Goerdts, C. J., Steffensmeier, J. J. G., Phillips, B.**  
4064           **B., Zimmerman, M. B., and Bergus, G. R., 2006, Comparative**  
4065           **antihypertensive effects of hydrochlorothiazide and chlorthalidone on**  
4066           **ambulatory and office blood pressure: Hypertension, v. 47, p. 352-358.**
- 4067           **42. Ferri, C. P., Prince, M., Brayne, C., Brodaty, H., Fratiglioni, L., Ganguli, M.,**  
4068           **Hall, K., Hasegawa, K., Hendrie, H., Huang, Y., Jorm, A., Mathers, C.,**  
4069           **Menezes, P. R., Rimmer, E., and Sczufca, M., 2005, Global prevalence of**  
4070           **dementia: a Delphi consensus study: Lancet, v. 366, p. 2112-2117.**
- 4071           **43. Forette, F., Seux, M. L., Staessen, J. A., Thijs, L., Birkenhager, W. H.,**  
4072           **Babarskiene, M. R., Babeanu, S., Bossini, A., Gil-Extremera, B., Girerd, X.,**  
4073           **Laks, T., Lilov, E., Moisseiev, V., Tuomilehto, J., Vanhanen, H., Webster, J.,**  
4074           **Yodfat, Y., and Fagard, R., 1998, Prevention of dementia in randomised**  
4075           **double-blind placebo-controlled Systolic Hypertension in Europe (Syst-Eur)**  
4076           **trial: Lancet, v. 352, p. 1347-1351.**
- 4077           **44. Foster, M. C., Hwang, S. J., Larson, M. G., Parikh, N. I., Meigs, J. B., Vasan,**  
4078           **R. S., Wang, T. J., Levy, D., and Fox, C. S., 2007, Cross-classification of**  
4079           **microalbuminuria and reduced glomerular filtration rate: associations**  
4080           **between cardiovascular disease risk factors and clinical outcomes:**  
4081           **Archives of Internal Medicine, v. 167, p. 1386-1392.**
- 4082           **45. Fox, K. M., 2003, Efficacy of perindopril in reduction of cardiovascular**  
4083           **events among patients with stable coronary artery disease: randomised,**  
4084           **double-blind, placebo-controlled, multicentre trial (the EUROPA study):**  
4085           **Lancet., v. 362, p. 782-788.**
- 4086           **46. Franklin, S. S., 1999, Cardiovascular risks related to increased diastolic,**  
4087           **systolic and pulse pressure. An epidemiologist's point of view:**  
4088           **Pathol.Biol.(Paris), v. 47, p. 594-603.**
- 4089           **47. Franklin, S. S., Jacobs, M. J., Wong, N. D., L'Italien, G. J., and Lapuerta, P.,**  
4090           **2001, Predominance of isolated systolic hypertension among middle-aged**

- 4091 and elderly US hypertensives: analysis based on National Health and  
4092 Nutrition Examination Survey (NHANES) III: Hypertension, v. 37, p. 869-874.
- 4093 48. Freitag, M. H., Peila, R., Masaki, K., Petrovitch, H., Ross, G. W., White, L. R.,  
4094 and Launer, L. J., 2006, Midlife pulse pressure and incidence of dementia:  
4095 the Honolulu-Asia Aging Study: *Stroke*, v. 37, p. 33-37.
- 4096 49. Fried, L. F., Katz, R., Cushman, M., Sarnak, M., Shlipak, M. G., Kuller, L., and  
4097 Newman, A. B., 2009, Change in cardiovascular risk factors with  
4098 progression of kidney disease: *Am.J Nephrol.*, v. 29, p. 334-341.
- 4099 50. Gillum, R. F., 1991, Cardiovascular disease in the United States: an  
4100 epidemiologic overview: *Cardiovasc.Clin.*, v. 21, p. 3-16.
- 4101 51. Go, A. S., Chertow, G. M., Fan, D., McCulloch, C. E., and Hsu, C. Y., 2004,  
4102 Chronic kidney disease and the risks of death, cardiovascular events, and  
4103 hospitalization: *N.Engl.J.Med.*, v. 351, p. 1296-1305.
- 4104 52. Greenlund, K. J., Croft, J. B., and Mensah, G. A., 2004, Prevalence of heart  
4105 disease and stroke risk factors in persons with prehypertension in the  
4106 United States, 1999-2000: *Archives of Internal Medicine*, v. 164, p. 2113-  
4107 2118.
- 4108 53. guero-Torres, H., von, S. E., Viitanen, M., Winblad, B., and Fratiglioni, L.,  
4109 2001, Institutionalization in the elderly: the role of chronic diseases and  
4110 dementia. Cross-sectional and longitudinal data from a population-based  
4111 study: *J.Clin.Epidemiol.*, v. 54, p. 795-801.
- 4112 54. Guralnik, J. M., Leveille, S. G., Hirsch, R., Ferrucci, L., and Fried, L. P., 1997,  
4113 The impact of disability in older women: *J.Am.Med.Womens Assoc.*, v. 52,  
4114 p. 113-120.
- 4115 55. Hajjar, I. and Kotchen, T. A., 2003, Trends in prevalence, awareness,  
4116 treatment, and control of hypertension in the United States, 1988-2000:  
4117 *JAMA*, v. 290, p. 199-206.
- 4118 56. Hancock, E. W., Deal, B. J., Mirvis, D. M., Okin, P., Kligfield, P., and Gettes,  
4119 L. S., 2009, AHA/ACCF/HRS Recommendations for the Standardization and  
4120 Interpretation of the Electrocardiogram Part V: Electrocardiogram Changes  
4121 Associated With Cardiac Chamber Hypertrophy A Scientific Statement  
4122 From the American Heart Association Electrocardiography and  
4123 Arrhythmias Committee, Council on Clinical Cardiology; the American  
4124 College of Cardiology Foundation; and the Heart Rhythm Society Endorsed  
4125 by the International Society for Computerized Electrocardiology: *Journal of*  
4126 *the American College of Cardiology*, v. 53, p. 992-1002.
- 4127 57. Hansson, L., Zanchetti, A., Carruthers, S. G., Dahlof, B., Elmfeldt, D., Julius,  
4128 S., Menard, J., Rahn, K. H., Wedel, H., and Westerling, S., 1998, Effects of  
4129 intensive blood-pressure lowering and low-dose aspirin in patients with  
4130 hypertension: principal results of the Hypertension Optimal Treatment  
4131 (HOT) randomised trial. HOT Study Group: *Lancet.*, v. 351, p. 1755-1762.

- 4132 58. Haroun, M. K., Jaar, B. G., Hoffman, S. C., Comstock, G. W., Klag, M. J., and  
4133 Coresh, J., 2003, Risk factors for chronic kidney disease: a prospective  
4134 study of 23,534 men and women in Washington County, Maryland: *J Am*  
4135 *Soc Nephrol*, v. 14, p. 2934-2941.
- 4136 59. HDFP, 1979a, Five-year findings of the hypertension detection and follow-  
4137 up program. I. Reduction in mortality of persons with high blood pressure,  
4138 including mild hypertension. *Hypertension Detection and Follow-up*  
4139 *Program Cooperative Group: JAMA*, v. 242, p. 2562-2571.
- 4140 60. HDFP, 1979b, Five-year findings of the hypertension detection and follow-  
4141 up program. II. Mortality by race-sex and age. *Hypertension Detection and*  
4142 *Follow-up Program Cooperative Group: JAMA*, v. 242, p. 2572-2577.
- 4143 61. HDFP, 1982, The effect of treatment on mortality in "mild" hypertension:  
4144 results of the hypertension detection and follow-up program: *The New*  
4145 *England Journal of Medicine*, v. 307, p. 976-980.
- 4146 62. HOT, 1998, Cost effectiveness of intensive treatment of hypertension.  
4147 Based on presentations by Donald S. Shepard, PhD; and Dominic Hodgkin,  
4148 PhD: *Am.J Manag.Care*, v. 4, p. S765-S769.
- 4149 63. Hsia, J., Margolis, K. L., Eaton, C. B., Wenger, N. K., Allison, M., Wu, L.,  
4150 LaCroix, A. Z., and Black, H. R., 2007, Prehypertension and cardiovascular  
4151 disease risk in the Women's Health Initiative: *Circulation*, v. 115, p. 855-860.
- 4152 64. Hsu, C. Y., McCulloch, C. E., Darbinian, J., Go, A. S., and Iribarren, C., 2005,  
4153 Elevated blood pressure and risk of end-stage renal disease in subjects  
4154 without baseline kidney disease: *Archives of Internal Medicine*, v. 165, p.  
4155 923-928.
- 4156 65. Ikram, M. A., van, O. M., de Jong, F. J., Kors, J. A., Koudstaal, P. J., Hofman,  
4157 A., Witteman, J. C., and Breteler, M. M., 2008, Unrecognized myocardial  
4158 infarction in relation to risk of dementia and cerebral small vessel disease:  
4159 *Stroke*, v. 39, p. 1421-1426.
- 4160 66. Jackson, R., 2000, Guidelines on preventing cardiovascular disease in  
4161 clinical practice: *BMJ*, v. 320, p. 659-661.
- 4162 67. Julius, S., Alderman, M. H., Beevers, G., Dahlof, B., Devereux, R. B.,  
4163 Douglas, J. G., Edelman, J. M., Harris, K. E., Kjeldsen, S. E., Nesbitt, S.,  
4164 Randall, O. S., and Wright, J. T., 2004, Cardiovascular risk reduction in  
4165 hypertensive black patients with left ventricular hypertrophy - The LIFE  
4166 study: *Journal of the American College of Cardiology*, v. 43, p. 1047-1055.
- 4167 68. Kaplan E, Goodglass F., and Weintraub S., 1983, *Boston Naming Test:*  
4168 *Philadelphia PA, Lea and Febiger.*
- 4169 69. Kawas, C., Segal, J., Stewart, W. F., Corrada, M., and Thal, L. J., 1994, A  
4170 validation study of the Dementia Questionnaire: *Arch.Neurol.*, v. 51, p. 901-  
4171 906.



- 4172 70. Kearney, P. M., Whelton, M., Reynolds, K., Muntner, P., Whelton, P. K., and  
4173 He, J., 2005, Global burden of hypertension: analysis of worldwide data:  
4174 The Lancet, v. 365, p. 217-223.
- 4175 71. Keeley, E. C., Kadakia, R., Soman, S., Borzak, S., and McCullough, P. A.,  
4176 2003, Analysis of long-term survival after revascularization in patients with  
4177 chronic kidney disease presenting with acute coronary syndromes: Am.J  
4178 Cardiol., v. 92, p. 509-514.
- 4179 72. Kivipelto, M., Helkala, E. L., Hanninen, T., Laakso, M. P., Hallikainen, M.,  
4180 Alhainen, K., Soininen, H., Tuomilehto, J., and Nissinen, A., 2001a, Midlife  
4181 vascular risk factors and late-life mild cognitive impairment: A population-  
4182 based study: Neurology, v. 56, p. 1683-1689.
- 4183 73. Kivipelto, M., Helkala, E. L., Hanninen, T., Laakso, M. P., Hallikainen, M.,  
4184 Alhainen, K., Soininen, H., Tuomilehto, J., and Nissinen, A., 2001b, Midlife  
4185 vascular risk factors and late-life mild cognitive impairment: A population-  
4186 based study: Neurology, v. 56, p. 1683-1689.
- 4187 74. Kivipelto, M., Helkala, E. L., Laakso, M. P., Hanninen, T., Hallikainen, M.,  
4188 Alhainen, K., Soininen, H., Tuomilehto, J., and Nissinen, A., 2001c, Midlife  
4189 vascular risk factors and Alzheimer's disease in later life: longitudinal,  
4190 population based study: BMJ, v. 322, p. 1447-1451.
- 4191 75. Klag, M. J., Whelton, P. K., Randall, B. L., Neaton, J. D., Brancati, F. L., Ford,  
4192 C. E., Shulman, N. B., and Stamler, J., 1996, Blood pressure and end-stage  
4193 renal disease in men: N.Engl.J.Med., v. 334, p. 13-18.
- 4194 76. Klahr, S., Levey, A. S., Beck, G. J., Caggiula, A. W., Hunsicker, L., Kusek, J.  
4195 W., and Striker, G., 1994, The effects of dietary protein restriction and  
4196 blood-pressure control on the progression of chronic renal disease.  
4197 Modification of Diet in Renal Disease Study Group: N.Engl.J.Med., v. 330, p.  
4198 877-884.
- 4199 77. Knopman, D., Boland, L. L., Mosley, T., Howard, G., Liao, D., Szklo, M.,  
4200 McGovern, P., and Folsom, A. R., 2001, Cardiovascular risk factors and  
4201 cognitive decline in middle-aged adults: Neurology, v. 56, p. 42-48.
- 4202 78. Kshirsagar, A. V., Carpenter, M., Bang, H., Wyatt, S. B., and Colindres, R. E.,  
4203 2006, Blood pressure usually considered normal is associated with an  
4204 elevated risk of cardiovascular disease: Am.J Med, v. 119, p. 133-141.
- 4205 79. Kuller, L. H., Margolis, K. L., Gaussoin, S. A., Bryan, N. R., Kerwin, D.,  
4206 Limacher, M., Wassertheil-Smoller, S., Williamson, J., and Robinson, J. G.,  
4207 2010, Relationship of hypertension, blood pressure, and blood pressure  
4208 control with white matter abnormalities in the Women's Health Initiative  
4209 Memory Study (WHIMS)-MRI trial: J Clin.Hypertens.(Greenwich.), v. 12, p.  
4210 203-212.
- 4211 80. Lachin, J. M. and Foulkes, M. A., 1986, Evaluation of sample size and power  
4212 for analyses of survival with allowance for nonuniform patient entry, losses

- 4213 to follow-up, noncompliance, and stratification: *Biometrics*, v. 42, p. 507-  
4214 519.
- 4215 81. Lakatos, E., 1988, Sample sizes based on the log-rank statistic in complex  
4216 clinical trials: *Biometrics*, v. 44, p. 229-241.
- 4217 82. Lawes, C. M., Vander, H. S., and Rodgers, A., 2008, Global burden of blood-  
4218 pressure-related disease, 2001: *Lancet*, v. 371, p. 1513-1518.
- 4219 83. Levey, A. S., Beto, J. A., Coronado, B. E., Eknoyan, G., Foley, R. N.,  
4220 Kasiske, B. L., Klag, M. J., Mailloux, L. U., Manske, C. L., Meyer, K. B.,  
4221 Parfrey, P. S., Pfeffer, M. A., Wenger, N. K., Wilson, P. W., and Wright, J. T.,  
4222 Jr., 1998, Controlling the epidemic of cardiovascular disease in chronic  
4223 renal disease: what do we know? What do we need to learn? Where do we  
4224 go from here? National Kidney Foundation Task Force on Cardiovascular  
4225 Disease: *Am.J Kidney Dis.*, v. 32, p. 853-906.
- 4226 84. Levy, D., Larson, M. G., Vasan, R. S., Kannel, W. B., and Ho, K. K., 1996, The  
4227 progression from hypertension to congestive heart failure: *JAMA*, v. 275, p.  
4228 1557-1562.
- 4229 85. Lewington, S., Clarke, R., Qizilbash, N., Peto, R., and Collins, R., 2002, Age-  
4230 specific relevance of usual blood pressure to vascular mortality: a meta-  
4231 analysis of individual data for one million adults in 61 prospective studies:  
4232 *Lancet*, v. 360, p. 1903-1913.
- 4233 86. Liao, D., Cooper, L., Cai, J., Toole, J. F., Bryan, N. R., Hutchinson, R. G., and  
4234 Tyroler, H. A., 1996, Presence and severity of cerebral white matter lesions  
4235 and hypertension, its treatment, and its control. The ARIC Study.  
4236 *Atherosclerosis Risk in Communities Study: Stroke*, v. 27, p. 2262-2270.
- 4237 87. Lindholm, L. H., Carlberg, B., and Samuelsson, O., 2005, Should beta  
4238 blockers remain first choice in the treatment of primary hypertension? A  
4239 meta-analysis: *Lancet*, v. 366, p. 1545-1553.
- 4240 88. Liu, L., Wang, J. G., Gong, L., Liu, G., and Staessen, J. A., 1998,  
4241 Comparison of active treatment and placebo in older Chinese patients with  
4242 isolated systolic hypertension. *Systolic Hypertension in China (Syst-China)*  
4243 *Collaborative Group: J Hypertens.*, v. 16, p. 1823-1829.
- 4244 89. Longstreth, W. T., Jr., Manolio, T. A., Arnold, A., Burke, G. L., Bryan, N.,  
4245 Jungreis, C. A., Enright, P. L., O'Leary, D., and Fried, L., 1996, Clinical  
4246 correlates of white matter findings on cranial magnetic resonance imaging  
4247 of 3301 elderly people. *The Cardiovascular Health Study: Stroke*, v. 27, p.  
4248 1274-1282.
- 4249 90. Luchsinger, J. A. and Mayeux, R., 2004, Cardiovascular risk factors and  
4250 Alzheimer's disease: *Curr.Atheroscler.Rep.*, v. 6, p. 261-266.
- 4251 91. Luepker, R. V., Apple, F. S., Christenson, R. H., Crow, R. S., Fortmann, S. P.,  
4252 Goff, D., Goldberg, R. J., Hand, M. M., Jaffe, A. S., Julian, D. G., Levy, D.,

- 4253 Manolio, T., Mendis, S., Mensah, G., Pajak, A., Prineas, R. J., Reddy, K. S.,  
4254 Roger, V. L., Rosamond, W. D., Shahrar, E., Sharrett, A. R., Sorlie, P., and  
4255 Tunstall-Pedoe, H., 2003, Case Definitions for Acute Coronary Heart  
4256 Disease in Epidemiology and Clinical Research Studies: A Statement From  
4257 the AHA Council on Epidemiology and Prevention; AHA Statistics  
4258 Committee; World Heart Federation Council on Epidemiology and  
4259 Prevention; the European Society of Cardiology Working Group on  
4260 Epidemiology and Prevention; Centers for Disease Control and Prevention;  
4261 and the National Heart, Lung, and Blood Institute: *Circulation*, v. 108, p.  
4262 2543-2549.
- 4263 92. Macmahon, S., Peto, R., Cutler, J., Collins, R., Sorlie, P., Neaton, J., Abbott,  
4264 R., Godwin, J., Dyer, A., and Stamler, J., 1990, Blood pressure, stroke, and  
4265 coronary heart disease. Part 1, Prolonged differences in blood pressure:  
4266 prospective observational studies corrected for the regression dilution  
4267 bias: *Lancet.*, v. 335, p. 765-774.
- 4268 93. Magsi, H. and Malloy, T., 2005, Underrecognition of cognitive impairment in  
4269 assisted living facilities: *J.Am.Geriatr.Soc.*, v. 53, p. 295-298.
- 4270 94. Mancia, G., De, B. G., Dominiczak, A., Cifkova, R., Fagard, R., Germano, G.,  
4271 Grassi, G., Heagerty, A. M., Kjeldsen, S. E., Laurent, S., Narkiewicz, K.,  
4272 Ruilope, L., Rynkiewicz, A., Schmieder, R. E., Struijker Boudier, H. A.,  
4273 Zanchetti, A., Vahanian, A., Camm, J., De, C. R., Dean, V., Dickstein, K.,  
4274 Filippatos, G., Funck-Brentano, C., Hellemans, I., Kristensen, S. D.,  
4275 McGregor, K., Sechtem, U., Silber, S., Tendera, M., Widimsky, P., Zamorano,  
4276 J. L., Kjeldsen, S. E., Erdine, S., Narkiewicz, K., Kiowski, W., gabiti-Rosei,  
4277 E., Ambrosioni, E., Cifkova, R., Dominiczak, A., Fagard, R., Heagerty, A. M.,  
4278 Laurent, S., Lindholm, L. H., Mancia, G., Manolis, A., Nilsson, P. M., Redon,  
4279 J., Schmieder, R. E., Struijker-Boudier, H. A., Viigimaa, M., Filippatos, G.,  
4280 Adamopoulos, S., gabiti-Rosei, E., Ambrosioni, E., Bertomeu, V., Clement,  
4281 D., Erdine, S., Farsang, C., Gaita, D., Kiowski, W., Lip, G., Mallion, J. M.,  
4282 Manolis, A. J., Nilsson, P. M., O'Brien, E., Ponikowski, P., Redon, J.,  
4283 Ruschitzka, F., Tamargo, J., van, Z. P., Viigimaa, M., Waeber, B., Williams,  
4284 B., Zamorano, J. L., The task force for the management of arterial  
4285 hypertension of the European Society of Hypertension, and The task force  
4286 for the management of arterial hypertension of the European Society of  
4287 Cardiology, 2007, 2007 Guidelines for the management of arterial  
4288 hypertension: The Task Force for the Management of Arterial Hypertension  
4289 of the European Society of Hypertension (ESH) and of the European  
4290 Society of Cardiology (ESC): *Eur.Heart J*, v. 28, p. 1462-1536.
- 4291 95. Mancia, G., Laurent, S., gabiti-Rosei, E., Ambrosioni, E., Burnier, M.,  
4292 Caulfield, M. J., Cifkova, R., Clement, D., Coca, A., Dominiczak, A., Erdine,  
4293 S., Fagard, R., Farsang, C., Grassi, G., Haller, H., Heagerty, A., Kjeldsen, S.  
4294 E., Kiowski, W., Mallion, J. M., Manolis, A., Narkiewicz, K., Nilsson, P.,  
4295 Olsen, M. H., Rahn, K. H., Redon, J., Rodicio, J., Ruilope, L., Schmieder, R.  
4296 E., Struijker-Boudier, H. A., Van Zwieten, P. A., Viigimaa, M., and Zanchetti,  
4297 A., 2009, Reappraisal of European guidelines on hypertension  
4298 management: a European Society of Hypertension Task Force document: *J*  
4299 *Hypertens.*

- 4300 96. McCullough, P. A., Jurkowitz, C. T., Pergola, P. E., McGill, J. B., Brown, W.  
4301 W., Collins, A. J., Chen, S. C., Li, S., Singh, A., Norris, K. C., Klag, M. J., and  
4302 Bakris, G. L., 2007, Independent components of chronic kidney disease as  
4303 a cardiovascular risk state: results from the Kidney Early Evaluation  
4304 Program (KEEP): *Archives of Internal Medicine*, v. 167, p. 1122-1129.
- 4305 97. Nasreddine, Z. S., Phillips, N. A., Bedirian, V., Charbonneau, S., Whitehead,  
4306 V., Collin, I., Cummings, J. L., and Chertkow, H., 2005, The montreal  
4307 cognitive assessment, MoCA: A brief screening tool for mild cognitive  
4308 impairment: *Journal of the American Geriatrics Society*, v. 53, p. 695-699.
- 4309 98. National Collaborating Centre for Chronic Conditions. Hypertension:  
4310 management in adults in primary care: pharmacological update. 2006.  
4311 London, Royal College of Physicians.  
4312 Ref Type: Report
- 4313 99. National Heart Foundation of Australia (National Blood Pressure and  
4314 Vascular Disease Advisory Committee). Guide to management of  
4315 hypertension 2008. 2009. *National Heart Foundation of Australia*.  
4316 Ref Type: Report
- 4317 100. National Institute on Aging. Progress Report on Alzheimer's Disease. NIH  
4318 Publication no. 00-4859. 2000. Department of Health and Human Services,  
4319 Public Health Service.  
4320 Ref Type: Report
- 4321 101. Neal, B., Macmahon, S., and Chapman, N., 2000, Effects of ACE inhibitors,  
4322 calcium antagonists, and other blood-pressure-lowering drugs: results of  
4323 prospectively designed overviews of randomised trials. Blood Pressure  
4324 Lowering Treatment Trialists' Collaboration: *Lancet*, v. 356, p. 1955-1964.
- 4325 102. Nilsson, S. E., Read, S., Berg, S., Johansson, B., Melander, A., and  
4326 Lindblad, U., 2007, Low systolic blood pressure is associated with impaired  
4327 cognitive function in the oldest old: longitudinal observations in a  
4328 population-based sample 80 years and older: *Aging Clin.Exp.Res.*, v. 19, p.  
4329 41-47.
- 4330 103. Nissen, S. E., Tuzcu, E. M., Libby, P., Thompson, P. D., Ghali, M., Garza, D.,  
4331 Berman, L., Shi, H., Buebendorf, E., and Topol, E. J., 2004, Effect of  
4332 antihypertensive agents on cardiovascular events in patients with coronary  
4333 disease and normal blood pressure: the CAMELOT study: a randomized  
4334 controlled trial: *JAMA.*, v. 292, p. 2217-2225.
- 4335 104. Ong, K. L., Cheung, B. M., Man, Y. B., Lau, C. P., and Lam, K. S., 2007,  
4336 Prevalence, awareness, treatment, and control of hypertension among  
4337 United States adults 1999-2004: *Hypertension*, v. 49, p. 69-75.
- 4338 105. Petersen, R. C., 2000, Aging, mild cognitive impairment, and Alzheimer's  
4339 disease: *Neurol.Clin.*, v. 18, p. 789-806.

- 4340 106. Peterson, J. C., Adler, S., Burkart, J. M., Greene, T., Hebert, L. A.,  
4341 Hunsicker, L. G., King, A. J., Klahr, S., Massry, S. G., and Seifter, J. L., 1995,  
4342 Blood pressure control, proteinuria, and the progression of renal disease.  
4343 The Modification of Diet in Renal Disease Study: *Ann.Intern Med*, v. 123, p.  
4344 754-762.
- 4345 107. Pfeffer, R. I., Kurosaki, T. T., Harrah, C. H., Jr., Chance, J. M., and Filos, S.,  
4346 1982, Measurement of functional activities in older adults in the  
4347 community: *J Gerontol.*, v. 37, p. 323-329.
- 4348 108. Plassman, B. L., Langa, K. M., Fisher, G. G., Heeringa, S. G., Weir, D. R.,  
4349 Ofstedal, M. B., Burke, J. R., Hurd, M. D., Potter, G. G., Rodgers, W. L.,  
4350 Steffens, D. C., Willis, R. J., and Wallace, R. B., 2007, Prevalence of  
4351 dementia in the United States: the aging, demographics, and memory  
4352 study: *Neuroepidemiology*, v. 29, p. 125-132.
- 4353 109. PROGRESS Collaborative Group, 2001, Randomised trial of a perindopril-  
4354 based blood-pressure-lowering regimen among 6105 individuals with  
4355 previous stroke or transient ischaemic attack: *The Lancet*, v. 358, p. 1033-  
4356 1041.
- 4357 110. Prospective Studies Collaboration, 2002, Age-specific relevance of usual  
4358 blood pressure to vascular mortality: a meta-analysis of individual data for  
4359 one million adults in 61 prospective studies: *The Lancet*, v. 360, p. 1903-  
4360 1913.
- 4361 111. Psaty, B. M., Smith, N. L., Siscovick, D. S., Koepsell, T. D., Weiss, N. S.,  
4362 Heckbert, S. R., Lemaitre, R. N., Wagner, E. H., and Furberg, C. D., 1997,  
4363 Health outcomes associated with antihypertensive therapies used as first-  
4364 line agents. A systematic review and meta-analysis: *JAMA*, v. 277, p. 739-  
4365 745.
- 4366 112. Qiu, C., Winblad, B., and Fratiglioni, L., 2005, The age-dependent relation of  
4367 blood pressure to cognitive function and dementia: *Lancet Neurol.*, v. 4, p.  
4368 487-499.
- 4369 113. Rahman, M., Pressel, S., Davis, B. R., Nwachuku, C., Wright, J. T., Jr.,  
4370 Whelton, P. K., Barzilay, J., Batuman, V., Eckfeldt, J. H., Farber, M. A.,  
4371 Franklin, S., Henriquez, M., Kopyt, N., Louis, G. T., Saklayen, M., Stanford,  
4372 C., Walworth, C., Ward, H., and Wiegmann, T., 2006, Cardiovascular  
4373 outcomes in high-risk hypertensive patients stratified by baseline  
4374 glomerular filtration rate: *Ann.Intern.Med.*, v. 144, p. 172-180.
- 4375 114. Rashidi, A., Sehgal, A. R., Rahman, M., and O'Connor, A. S., 2008, The case  
4376 for chronic kidney disease, diabetes mellitus, and myocardial infarction  
4377 being equivalent risk factors for cardiovascular mortality in patients older  
4378 than 65 years: *Am.J Cardiol.*, v. 102, p. 1668-1673.
- 4379 115. Reitan R.M. Validity of the trail making test as an indicator of organic brain  
4380 damage. [8], 271-276. 1958. *Percept Mot Skills*.  
4381 Ref Type: Serial (Book,Monograph)

- 4382 116. Reitz, C., Tang, M. X., Manly, J., Mayeux, R., and Luchsinger, J. A., 2007,  
4383 Hypertension and the risk of mild cognitive impairment: Arch.Neurol., v. 64,  
4384 p. 1734-1740.
- 4385 117. Rosamond, W. D., Chang, P., Baggett, C., Bertoni, A., Shahar, E., Deswal,  
4386 A., Heiss, G., and Chambless, L., 2009, Classification of Heart Failure in the  
4387 Atherosclerosis Risk in Communities (ARIC) Study: A Comparison With  
4388 Other Diagnostic Criteria: Circulation, v. 120, p. S506.
- 4389 118. Rosano, C., Kuller, L. H., Chung, H., Arnold, A. M., Longstreth, W. T., Jr.,  
4390 and Newman, A. B., 2005, Subclinical brain magnetic resonance imaging  
4391 abnormalities predict physical functional decline in high-functioning older  
4392 adults: J.Am.Geriatr.Soc., v. 53, p. 649-654.
- 4393 119. Rosendorff, C., Black, H. R., Cannon, C. P., Gersh, B. J., Gore, J., Izzo, J. L.,  
4394 Kaplan, N. M., O'Connor, C. M., O'Gara, P. T., and Oparil, S., 2007,  
4395 Treatment of hypertension in the prevention and management of ischemic  
4396 heart disease - A scientific statement from the American Heart Association  
4397 council for high blood pressure research and the councils on clinical  
4398 cardiology and epidemiology and prevention: Hypertension, v. 50, p. E28-  
4399 E55.
- 4400 120. Sacco, R. L., Boden-Albala, B., Abel, G., Lin, I. F., Elkind, M., Hauser, W. A.,  
4401 Paik, M. C., and Shea, S., 2001, Race-ethnic disparities in the impact of  
4402 stroke risk factors: the northern Manhattan stroke study: Stroke., v. 32, p.  
4403 1725-1731.
- 4404 121. Sarnak, M. J., Greene, T., Wang, X., Beck, G., Kusek, J. W., Collins, A. J.,  
4405 and Levey, A. S., 2005, The effect of a lower target blood pressure on the  
4406 progression of kidney disease: long-term follow-up of the modification of  
4407 diet in renal disease study: Ann.Intern Med, v. 142, p. 342-351.
- 4408 122. Sarnak, M. J., Levey, A. S., Schoolwerth, A. C., Coresh, J., Culleton, B.,  
4409 Hamm, L. L., McCullough, P. A., Kasiske, B. L., Kelepouris, E., Klag, M. J.,  
4410 Parfrey, P., Pfeffer, M., Raij, L., Spinosa, D. J., and Wilson, P. W., 2003,  
4411 Kidney Disease as a Risk Factor for Development of Cardiovascular  
4412 Disease: A Statement From the American Heart Association Councils on  
4413 Kidney in Cardiovascular Disease, High Blood Pressure Research, Clinical  
4414 Cardiology, and Epidemiology and Prevention: Circulation, v. 108, p. 2154-  
4415 2169.
- 4416 123. Schaeffner, E. S., Kurth, T., Bowman, T. S., Gelber, R. P., and Gaziano, J.  
4417 M., 2008, Blood pressure measures and risk of chronic kidney disease in  
4418 men: Nephrol.Dial.Transplant, v. 23, p. 1246-1251.
- 4419 124. SHEP, 1991, Prevention of stroke by antihypertensive drug treatment in  
4420 older persons with isolated systolic hypertension. Final results of the  
4421 Systolic Hypertension in the Elderly Program (SHEP). SHEP Cooperative  
4422 Research Group: JAMA, v. 265, p. 3255-3264.

- 4423 125. Shlipak, M. G., Heidenreich, P. A., Noguchi, H., Chertow, G. M., Browner, W.  
4424 S., and McClellan, M. B., 2002, Association of renal insufficiency with  
4425 treatment and outcomes after myocardial infarction in elderly patients:  
4426 *Ann.Intern Med*, v. 137, p. 555-562.
- 4427 126. Shlipak, M. G., Katz, R., Kestenbaum, B., Siscovick, D., Fried, L., Newman,  
4428 A., Rifkin, D., and Sarnak, M. J., 2009, Rapid decline of kidney function  
4429 increases cardiovascular risk in the elderly: *J Am.Soc.Nephrol.*, v. 20, p.  
4430 2625-2630.
- 4431 127. Shumaker, S. A., Legault, C., Kuller, L., Rapp, S. R., Thal, L., Lane, D. S.,  
4432 Fillit, H., Stefanick, M. L., Hendrix, S. L., Lewis, C. E., Masaki, K., and Coker,  
4433 L. H., 2004, Conjugated equine estrogens and incidence of probable  
4434 dementia and mild cognitive impairment in postmenopausal women:  
4435 *Women's Health Initiative Memory Study: JAMA*, v. 291, p. 2947-2958.
- 4436 128. Sipahi, I., Tuzcu, E. M., Schoenhagen, P., Wolski, K. E., Nicholls, S. J.,  
4437 Balog, C., Crowe, T. D., and Nissen, S. E., 2006, Effects of normal, pre-  
4438 hypertensive, and hypertensive blood pressure levels on progression of  
4439 coronary atherosclerosis: *J Am.Coll.Cardiol.*, v. 48, p. 833-838.
- 4440 129. Skoog, I. and Gustafson, D., 2006, Update on hypertension and Alzheimer's  
4441 disease: *Neurol.Res.*, v. 28, p. 605-611.
- 4442 130. Skoog, I. and Gustafson, D., 2003, Hypertension, hypertension-clustering  
4443 factors and Alzheimer's disease: *Neurol.Res.*, v. 25, p. 675-680.
- 4444 131. Skoog, I., Lithell, H., Hansson, L., Elmfeldt, D., Hofman, A., Olofsson, B.,  
4445 Trenkwalder, P., and Zanchetti, A., 2005, Effect of baseline cognitive  
4446 function and antihypertensive treatment on cognitive and cardiovascular  
4447 outcomes: Study on COgnition and Prognosis in the Elderly (SCOPE):  
4448 *Am.J Hypertens.*, v. 18, p. 1052-1059.
- 4449 132. Somes, G. W., Pahor, M., Shorr, R. I., Cushman, W. C., and Applegate, W.  
4450 B., 1999, The role of diastolic blood pressure when treating isolated  
4451 systolic hypertension: *Archives of Internal Medicine*, v. 159, p. 2004-2009.
- 4452 133. Somes, G. W., Shorr, R. I., and Pahor, M., 1999, A new twist in the J-shape  
4453 curve?: *J Am.Geriatr.Soc.*, v. 47, p. 1477-1478.
- 4454 134. Staessen, J. A., Fagard, R., Thijs, L., Celis, H., Arabidze, G. G., Birkenhager,  
4455 W. H., Bulpitt, C. J., de Leeuw, P. W., Dollery, C. T., Fletcher, A. E., Forette,  
4456 F., Leonetti, G., Nachev, C., O'Brien, E. T., Rosenfeld, J., Rodicio, J. L.,  
4457 Tuomilehto, J., and Zanchetti, A., 1997, Randomised double-blind  
4458 comparison of placebo and active treatment for older patients with isolated  
4459 systolic hypertension. The Systolic Hypertension in Europe (Syst-Eur) Trial  
4460 Investigators: *Lancet*, v. 350, p. 757-764.
- 4461 135. Staessen, J. A., Wang, J. G., and Thijs, L., 2001, Cardiovascular protection  
4462 and blood pressure reduction: a meta-analysis: *Lancet*, v. 358, p. 1305-  
4463 1315.

- 4464 136. Staessen, J. A., Wang, J. G., Thijs, L., and Fagard, R., 1999, Overview of the  
4465 outcome trials in older patients with isolated systolic hypertension: J  
4466 Hum.Hypertens., v. 13, p. 859-863.
- 4467 137. The ACCORD Study Group, 2010, Effects of Intensive Blood-Pressure  
4468 Control in Type 2 Diabetes Mellitus: The New England Journal of Medicine,  
4469 p. NEJMoa1001286.
- 4470 138. Tzourio, C., Anderson, C., Chapman, N., Woodward, M., Neal, B.,  
4471 Macmahon, S., and Chalmers, J., 2003, Effects of blood pressure lowering  
4472 with perindopril and indapamide therapy on dementia and cognitive decline  
4473 in patients with cerebrovascular disease: Arch.Intern Med, v. 163, p. 1069-  
4474 1075.
- 4475 139. Vasan, R. S., Larson, M. G., Leip, E. P., Evans, J. C., O'Donnell, C. J.,  
4476 Kannel, W. B., and Levy, D., 2001, Impact of high-normal blood pressure on  
4477 the risk of cardiovascular disease: N Engl J Med, v. 345, p. 1291-1297.
- 4478 140. Verdelho, A., Madureira, S., Ferro, J. M., Basile, A. M., Chabriat, H.,  
4479 Erkinjuntti, T., Fazekas, F., Hennerici, M., O'brien, J., Pantoni, L., Salvadori,  
4480 E., Scheltens, P., Visser, M. C., Wahlund, L. O., Waldemar, G., Wallin, A.,  
4481 and Inzitari, D., 2007, Differential impact of cerebral white matter changes,  
4482 diabetes, hypertension and stroke on cognitive performance among non-  
4483 disabled elderly. The LADIS study: J Neurol.Neurosurg.Psychiatry, v. 78, p.  
4484 1325-1330.
- 4485 141. Vermeer, S. E., Prins, N. D., den, H. T., Hofman, A., Koudstaal, P. J., and  
4486 Breteler, M. M., 2003, Silent brain infarcts and the risk of dementia and  
4487 cognitive decline: N Engl J Med, v. 348, p. 1215-1222.
- 4488 142. Wang, Y. and Wang, Q. J., 2004, The prevalence of prehypertension and  
4489 hypertension among US adults according to the new joint national  
4490 committee guidelines: new challenges of the old problem: Arch.Intern Med,  
4491 v. 164, p. 2126-2134.
- 4492 143. Wechsler D., 1981, Manual for the Wechsler Adult Intelligence Scale: The  
4493 Psychological Corporation, Harcourt Brace Janvanovich, Inc..
- 4494 144. Weiner, D. E., Tighiouart, H., Amin, M. G., Stark, P. C., MacLeod, B., Griffith,  
4495 J. L., Salem, D. N., Levey, A. S., and Sarnak, M. J., 2004, Chronic kidney  
4496 disease as a risk factor for cardiovascular disease and all-cause mortality:  
4497 a pooled analysis of community-based studies: J.Am.Soc.Nephrol., v. 15, p.  
4498 1307-1315.
- 4499 145. Weiner, D. E., Tighiouart, H., Levey, A. S., Elsayed, E., Griffith, J. L., Salem,  
4500 D. N., and Sarnak, M. J., 2007, Lowest systolic blood pressure is associated  
4501 with stroke in stages 3 to 4 chronic kidney disease: J.Am.Soc.Nephrol., v.  
4502 18, p. 960-966.
- 4503 146. Welsh, K. A., Breitner, J. C. S., and Magruderhabib, K. M., 1993, Detection of  
4504 Dementia in the Elderly Using Telephone Screening of Cognitive Status:



- 4505            **Neuropsychiatry Neuropsychology and Behavioral Neurology, v. 6, p. 103-**  
4506            **110.**
- 4507            **147. Whitworth, J. A., 2003, 2003 World Health Organization (WHO)/International**  
4508            **Society of Hypertension (ISH) statement on management of hypertension: J**  
4509            **Hypertens., v. 21, p. 1983-1992.**
- 4510            **148. Winblad, B., Palmer, K., Kivipelto, M., Jelic, V., and Fratiglioni, L., 2004,**  
4511            **Introduction: Mild cognitive impairment: beyond controversies, towards a**  
4512            **consensus: Journal of Internal Medicine, v. 256, p. 181-182.**
- 4513            **149. World Health Organization. World Health Report 2002: Reducing Risk,**  
4514            **promoting healthy life. 2002. World Health Organization.**  
4515            **Ref Type: Report**
- 4516            **150. Wright, J. T., Jr., Agodoa, L., Contreras, G., Greene, T., Douglas, J. G., Lash,**  
4517            **J., Randall, O., Rogers, N., Smith, M. C., and Massry, S., 2002a, Successful**  
4518            **blood pressure control in the African American Study of Kidney Disease**  
4519            **and Hypertension: Arch.Intern.Med., v. 162, p. 1636-1643.**
- 4520            **151. Wright, J. T., Jr., Bakris, G., Greene, T., Agodoa, L. Y., Appel, L. J.,**  
4521            **Charleston, J., Cheek, D., Douglas-Baltimore, J. G., Gassman, J., Glassock,**  
4522            **R., Hebert, L., Jamerson, K., Lewis, J., Phillips, R. A., Toto, R. D., Middleton,**  
4523            **J. P., and Rostand, S. G., 2002b, Effect of blood pressure lowering and**  
4524            **antihypertensive drug class on progression of hypertensive kidney**  
4525            **disease: results from the AASK trial: JAMA, v. 288, p. 2421-2431.**
- 4526            **152. Wright, J. T., Dunn, J. K., Cutler, J. A., Davis, B. R., Cushman, W. C., Ford,**  
4527            **C. E., Haywood, L. J., Leenen, F. H. H., Margolis, K. L., Papademetriou, V.,**  
4528            **Probstfield, J. L., Whelton, P. K., and Habib, G. B., 2005, Outcomes in**  
4529            **hypertensive black and nonblack patients treated with chlorthalidone,**  
4530            **amlodipine, and lisinopril: Jama-Journal of the American Medical**  
4531            **Association, v. 293, p. 1595-1607.**
- 4532            **153. Wright, J. T., Harris-Haywood, S., Pressel, S., Barzilay, J., Bairnbridge, C.,**  
4533            **Bareis, C. J., Basile, J. N., Black, H. R., Dart, R., Gupta, A. K., Hamilton, B.**  
4534            **P., Einhorn, P. T., Haywood, L. J., Jafri, S. Z. A., Louis, G. T., Whelton, P. K.,**  
4535            **Scott, C. L., Sinnnons, D. L., Stanford, C., and Davis, B. R., 2008, Clinical**  
4536            **outcomes by race in hypertensive patients with and without the metabolic**  
4537            **syndrome - Antihypertensive and Lipid-Lowering Treatment to Prevent**  
4538            **Heart Attack Trial (ALLHAT): Archives of Internal Medicine, v. 168, p. 207-**  
4539            **217.**
- 4540            **154. Yusuf, S., Sleight, P., Pogue, J., Bosch, J., Davies, R., and Dagenais, G.,**  
4541            **2000, Effects of an angiotensin-converting-enzyme inhibitor, ramipril, on**  
4542            **cardiovascular events in high-risk patients. The Heart Outcomes**  
4543            **Prevention Evaluation Study Investigators [published errata appear in N**  
4544            **Engl J Med 2000 Mar 9;342(10):748 and 2000 May 4;342(18):1376]: N Engl J**  
4545            **Med, v. 342, p. 145-153.**  
4546  
4547

|      |                                       |      |                                                                                                          |
|------|---------------------------------------|------|----------------------------------------------------------------------------------------------------------|
| 4548 | <b>APPENDIX 1: Abbreviations Used</b> | 4602 |                                                                                                          |
| 4549 |                                       | 4603 |                                                                                                          |
| 4550 | AAA:                                  | 4604 | DASH: Dietary Approaches to Stop Hypertension                                                            |
| 4551 | AASK:                                 | 4605 |                                                                                                          |
| 4552 |                                       | 4606 | DBP: Diastolic Blood Pressure                                                                            |
| 4553 |                                       | 4607 | DDC: Drug Distribution Center                                                                            |
| 4554 | ABI:                                  | 4608 | DHP: Dihydropyridine                                                                                     |
| 4555 | ACC:                                  | 4609 | DQ: Dementia Questionnaire                                                                               |
| 4556 |                                       | 4610 | DSC: Digit Symbol Coding test                                                                            |
| 4557 | ACCORD:                               | 4611 | DSMB: Data Safety Monitoring Board                                                                       |
| 4558 |                                       | 4612 |                                                                                                          |
| 4559 |                                       | 4613 | DSM-IV: Diagnostic and Statistical Manual of Mental Disorders - Fourth Edition                           |
| 4560 | ACE:                                  | 4614 |                                                                                                          |
| 4561 |                                       | 4615 |                                                                                                          |
| 4562 | ACR:                                  | 4616 | DSST: Digit Symbol Substitution Test                                                                     |
| 4563 | ACS:                                  | 4617 |                                                                                                          |
| 4564 | AD:                                   | 4618 | DST: Digit Span Test                                                                                     |
| 4565 | AE:                                   | 4619 | ECG: Electrocardiogram                                                                                   |
| 4566 | AHA:                                  | 4620 | ED: Erectile Dysfunction                                                                                 |
| 4567 | ALLHAT:                               | 4621 | eGFR: Estimated Glomerular Filtration Rate                                                               |
| 4568 |                                       | 4622 |                                                                                                          |
| 4569 |                                       | 4623 | EnaC Inhibitor: Epithelial Sodium Channel Inhibitor                                                      |
| 4570 | ARB:                                  | 4624 |                                                                                                          |
| 4571 | ARIC:                                 | 4625 | EPICARE: Epidemiological Cardiology Research Center                                                      |
| 4572 |                                       | 4626 |                                                                                                          |
| 4573 | AS:                                   | 4627 | EQ-5D: EuroQol 5 Dimensional Descriptive System                                                          |
| 4574 | ASCOT:                                | 4628 |                                                                                                          |
| 4575 |                                       | 4629 | ESRD: End Stage Renal Disease                                                                            |
| 4576 | BID:                                  | 4630 | EUROPA: European Trial on Reduction of Cardiac Events with Perindopril in Stable Coronary Artery Disease |
| 4577 | BNT:                                  | 4631 |                                                                                                          |
| 4578 | BP:                                   | 4632 |                                                                                                          |
| 4579 | BPH:                                  | 4633 |                                                                                                          |
| 4580 | CABG:                                 | 4634 | FAQ: Functional Activities Questionnaire                                                                 |
| 4581 |                                       | 4635 |                                                                                                          |
| 4582 | CAD:                                  | 4636 | FDA: Food and Drug Administration                                                                        |
| 4583 | CAMELOT:                              | 4637 |                                                                                                          |
| 4584 |                                       | 4638 | FES-I: Falls Self-Efficacy Scale International                                                           |
| 4585 |                                       | 4639 |                                                                                                          |
| 4586 | CC:                                   | 4640 | FRS: Framingham Risk Score                                                                               |
| 4587 | CCB:                                  | 4641 | FSFI: Female Sexual Function Assessment                                                                  |
| 4588 | CCN:                                  | 4642 |                                                                                                          |
| 4589 | CE:                                   | 4643 | GCP: Good Clinical Practice                                                                              |
| 4590 | CEA:                                  | 4644 | GEMS: Gingko Evaluation of Memory Study                                                                  |
| 4591 | CHD:                                  | 4645 |                                                                                                          |
| 4592 | CHF:                                  | 4646 | GFR: Glomerular Filtration Rate                                                                          |
| 4593 | CHS:                                  | 4647 | GXT: Graded Exercise Test                                                                                |
| 4594 | CKD:                                  | 4648 | HDFP: Hypertension Detection and Follow-up Program                                                       |
| 4595 | Co-PI:                                | 4649 |                                                                                                          |
| 4596 | CPT:                                  | 4650 | HF: Heart Failure                                                                                        |
| 4597 |                                       | 4651 | HIPAA: Health Information Portability and Accountability Act                                             |
| 4598 | CUA:                                  | 4652 |                                                                                                          |
| 4599 | CV:                                   | 4653 | HOPE: Hospital Outcomes Project for the Elderly                                                          |
| 4600 | CVD:                                  | 4654 |                                                                                                          |
| 4601 |                                       |      |                                                                                                          |

|      |            |                                 |      |              |                              |
|------|------------|---------------------------------|------|--------------|------------------------------|
| 4655 | HOT:       | Hypertension Optimal            | 4708 | NINDS:       | National Institute of        |
| 4656 |            | Treatment trial                 | 4709 |              | Neurological Disorders and   |
| 4657 | HRQL:      | Health Related Quality of Life  | 4710 |              | Stroke                       |
| 4658 | HTN:       | Hypertension                    | 4711 | OH:          | Orthostatic Hypotension      |
| 4659 | HVLT:      | Hopkins Verbal Learning Test    | 4712 | P&P:         | Publications and             |
| 4660 | HYVET:     | Hypertension in the Very        | 4713 |              | Presentations                |
| 4661 |            | Elderly Trial                   | 4714 | PAD:         | Peripheral Artery Disease    |
| 4662 | HYVET COG: | Hypertension in the Very        | 4715 | PCI:         | Percutaneous Coronary        |
| 4663 |            | Elderly Trial – cognitive       | 4716 |              | Intervention                 |
| 4664 |            | function assessment             | 4717 | PEACE:       | Prevention of Events with    |
| 4665 | ICER:      | Incremental Cost-Effectiveness  | 4718 |              | Angiotensin Coverting        |
| 4666 |            | Ratio                           | 4719 |              | Enzyme                       |
| 4667 | ID:        | Identification                  | 4720 | PHI:         | Private Health Information   |
| 4668 | IIEF:      | International Index of Erectile | 4721 | PHQ:         | Patient Health Questionnaire |
| 4669 |            | Function                        | 4722 | PI:          | Principal Investigator       |
| 4670 | IRB:       | Institutional Review Board      | 4723 | PKD:         | Polycystic Kidney Disease    |
| 4671 | ISH:       | Isolated Systolic Hypertension  | 4724 | PROGRESS:    | Perindopril Protection       |
| 4672 | JNC:       | Joint National Committee        | 4725 |              | Against Recurrent Stroke     |
| 4673 | JNC-7:     | The Seventh Report of the       | 4726 |              | Study                        |
| 4674 |            | Joint National Committee on     | 4727 | PTS:         | Participant Tracking System  |
| 4675 |            | Prevention, Detection,          | 4728 | QALY:        | Quality Adjusted Life Years  |
| 4676 |            | Evaluation, and Treatment of    | 4729 | QC:          | Quality Control              |
| 4677 |            | High Blood Pressure             | 4730 | RAAS:        | Renin-angiotensin-           |
| 4678 | LMT:       | Logical Memory Test             | 4731 |              | aldosteribe system           |
| 4679 | LVH:       | Left Ventricular Hypertrophy    | 4732 | RAS:         | Renin Angiotensin System     |
| 4680 | MAP:       | Mean Arterial Pressure          | 4733 | SAE:         | Serious Adverse Event        |
| 4681 | MAR:       | Missing-at-Random Analyses      | 4734 | SBP:         | Systolic Blood Pressure      |
| 4682 | MCI:       | Mild Cognitive Impairment       | 4735 | SCOPE:       | Study on Cognition and       |
| 4683 | MDRD:      | Modification of Diet in Renal   | 4736 |              | Prognosis in the Elderly     |
| 4684 |            | Disease Study                   | 4737 | SHEP:        | Systolic Hypertension in the |
| 4685 | MI:        | Myocardial Infarction           | 4738 |              | Elderly Program              |
| 4686 | MIND:      | Memory and Cognition In         | 4739 | SPRINT:      | Systolic Blood Pressure      |
| 4687 |            | Decreased Hypertension          | 4740 |              | Intervention Trial           |
| 4688 | MoCA:      | Montreal Cognitive              | 4741 | SPRINT MIND: | SPRINT Memory and            |
| 4689 |            | Assessment                      | 4742 |              | Cognition In Decreased       |
| 4690 | MOP:       | Manual of Procedures            | 4743 |              | Hypertension                 |
| 4691 | MPQC:      | Measurement Procedures and      | 4744 | SSL:         | Secure Socket Layer          |
| 4692 |            | Quality Control                 | 4745 | SVID:        | Small Vessel Ischemic        |
| 4693 | mRey-O:    | Modified Rey-Osterrieth         | 4746 |              | Disease                      |
| 4694 |            | Complex Figure                  | 4747 | Syst-Eur:    | Systolic Hypertension in     |
| 4695 | MRI:       | Magnetic Resonance Imaging      | 4748 |              | Europe Trial                 |
| 4696 | NEJM:      | New England Journal of          | 4749 | TICS-M:      | Modified Telephone Interview |
| 4697 |            | Medicine                        | 4750 |              | for Cognitive Status         |
| 4698 | NKF:       | National Kidney Foundation      | 4751 | TMT:         | Trail Making Test            |
| 4699 | NHANES:    | National Health and Nutrition   | 4752 | UKPDS:       | United Kingdom Prospective   |
| 4700 |            | Examination Survey              | 4753 |              | Diabetes Study               |
| 4701 | NHLBI:     | National Heart, Lung, and       | 4754 | WHI:         | Women’s Health Initiative    |
| 4702 |            | Blood Institute                 | 4755 | WHIMS:       | Women’s Health Initiative    |
| 4703 | NIA:       | National Institute on Aging     | 4756 |              | Memory Study                 |
| 4704 | NIDDK:     | National Institute of Diabetes  | 4757 | WWW:         | World Wide Web               |
| 4705 |            | and Digestive and Kidney        | 4758 |              |                              |
| 4706 |            | Diseases                        |      |              |                              |
| 4707 | NIH:       | National Institutes of Health   |      |              |                              |

4759  
4760  
4761  
4762  
4763  
4764  
4765  
4766  
4767  
4768  
4769  
4770  
4771  
4772  
4773  
4774  
4775  
4776  
4777  
4778  
4779  
4780  
4781  
4782  
4783  
4784  
4785  
4786  
4787  
4788  
4789  
4790  
4791  
4792  
4793  
4794  
4795  
4796  
4797  
4798  
4799  
4800  
4801  
4802  
4803  
4804  
4805  
4806  
4807  
4808  
4809

## **APPENDIX 2: Computational Details and Sensitivity Analyses for the CVD outcome**

Power computations were developed using event rates observed in ALLHAT. The ALLHAT Coordinating Center provided us with summary data across all three arms allowing us to calculate event rates using different combinations of baseline characteristics. Event rates were calculated using a composite outcome including fatal CVD, non-MI acute coronary syndrome, and nonfatal MI, stroke, and heart failure. For ALLHAT participants without diabetes, the annual event rate was 4.39 %/yr. (Note: ALLHAT used hospitalized angina rather than non-MI acute coronary syndrome.)

This rate of 4.39 %/yr provides a starting point for the estimation of event rates we will expect in SPRINT. Several factors can be considered which suggest that these rates should be either increased or decreased. Factors arguing for an increased event rate include (1) SPRINT will have an older cohort of participants than did ALLHAT, (2) SPRINT will use the Framingham risk score of  $\geq 15\%$  10-year CVD risk as an inclusion criterion, and (3) inclusion of a substantial group of participants with Stage 3 or Stage 4 CKD. Factors that are expected to reduce the event rate include (1) the temporal trend towards a reduction in CVD event rates in the U.S. and (2) a more rigorous definition of non-MI acute coronary syndrome that will be used in SPRINT. It is difficult to precisely estimate the impact that these five factors will have on the SPRINT event rate.

In ALLHAT, event rates increased substantially with age. The event rate for participants 70 to <75 years old was 5.19 %/yr; for participants  $\geq 75$  years old, the event rate was 6.99 %/yr. In ALLHAT 17.7% of the participants were 70 to <75 years old, while 18.5% were  $\geq 75$  years old. We expect that participants in these age categories will represent a greater fraction of the SPRINT cohort. Approximately 50% (4625 participants) are expected to be at least 70 years old, while 35.1% (3250 participants) are expected to be  $\geq 75$  years old. This will likely yield a higher event rate in SPRINT, compared to ALLHAT.

The event rate in ALLHAT among participants with 10-year Framingham risk  $\geq 15\%$  at baseline was 4.67 %/yr. Our including people with  $\geq 15\%$  10-year risk will help to ensure a higher event rate.

We expect that 4300 SPRINT participants will have eGFR 20 to <60 mL/min/1.73m<sup>2</sup> with equal numbers above and below 45 mL/min/1.73m<sup>2</sup>. In ALLHAT, the event rate was 5.89 %/yr for those with eGFR 45 to <60 mL/min/1.73m<sup>2</sup>. Among those <45, the event rate was 8.24 %/yr. In ALLHAT, 18.6% had eGFR <60 mL/min/1.73m<sup>2</sup> as compared with the expected 46.7% in SPRINT. Increasing the numbers of participants with CKD in SPRINT will help increase the event rates.

We compared ALLHAT participants with diabetes to participants in the ACCORD BP trial (all of whom have diabetes) using outcome variables that are as similar as possible. In ALLHAT the event rate was 5.90 %/yr. The corresponding event rate in ACCORD was 3.43 %/yr. The reduction in event rates between ALLHAT and ACCORD could be due to a temporal trend (ALLHAT was 1994—1999, ACCORD was 2001—2009), because ALLHAT participants were older (mean 67 years) than ACCORD (mean 62.2 years), or for other reasons.

Exactly how we should use the ALLHAT data to estimate the event rates for SPRINT is unclear. Since the rates in ACCORD were approximately half of those in ALLHAT, *for the purposes of*

4810 *power we will assume that the SPRINT rates will also be half of the ALLHAT rates.* This  
 4811 assumption balances the possibility of a further temporal trend in event rate reduction with the  
 4812 fact that participants recruited for SPRINT will be older, have lower kidney function, and have  
 4813 greater Framingham CVD risk scores than those recruited in either ALLHAT or ACCORD. We  
 4814 expect that this may be slightly conservative. Thus, we assume that the event rate in SPRINT  
 4815 will be approximately 2.2 %/yr for the composite outcome including non-fatal MI, non-fatal  
 4816 stroke, cardiovascular death, hospitalized heart failure, and non-MI acute coronary syndrome.

4817  
 4818 We have assumed a 2-year uniform accrual period, 3 years 10 months minimum follow-up  
 4819 (assumes that closeout visits occur uniformly over a 4-month period), and a 2 sided significance  
 4820 level of 0.05. The effect size for the primary outcome is assumed to be 20% in the entire  
 4821 sample and the CKD subsample, and 25% in the Senior subsample. Loss to follow-up and  
 4822 events are assumed to follow an exponential model. We expect that the annual rate of loss to  
 4823 follow-up will be approximately 2% but have included rates up to 3% to be conservative.  
 4824 Calculations made using two methods (Lachin and Foulkes, 1986;Lakatos, 1988) were similar.  
 4825 Power for the primary outcome for a range of event rates and annual loss rates is presented in  
 4826 Table 1 for the assumed effect size of 20%.

4827

| Table 1. Power for the primary outcome in entire sample of 9250 participants for a 20% effect (Hazard Ratio of 0.8). |                                       |      |      |      |      |
|----------------------------------------------------------------------------------------------------------------------|---------------------------------------|------|------|------|------|
| Annual Loss Rate (%/yr)                                                                                              | Annual Standard Arm Event Rate (%/yr) |      |      |      |      |
|                                                                                                                      | 1.8                                   | 2.0  | 2.2  | 2.4  | 2.6  |
| 1                                                                                                                    | 82.9                                  | 86.5 | 89.4 | 91.7 | 93.5 |
| 2                                                                                                                    | 82.0                                  | 85.7 | 88.7 | 91.0 | 93.0 |
| 3                                                                                                                    | 81.1                                  | 84.8 | 87.9 | 90.4 | 92.4 |

4828

4829 In ALLHAT the event rates were 5.89 %/yr and 8.24 %/yr for people whose eGFR was 45 to  
 4830 <60 or <45 mL/min/1.73m<sup>2</sup>. We will assume that the event rate for the primary outcome in  
 4831 SPRINT will be 4 %/yr among participants with eGFR <60 mL/min/1.73m<sup>2</sup>. Power for the  
 4832 primary outcome among SPRINT participants with CKD for a range of event rates and annual  
 4833 loss rates is presented in Table 2 for the assumed effect size of 20%.

4834

| Table 2. Power for the primary outcome in CKD subsample (eGFR < 60 mL/min/1.73m <sup>2</sup> ) of 4300 participants for a 20% effect (Hazard Ratio of 0.8). |                                       |      |      |      |      |
|-------------------------------------------------------------------------------------------------------------------------------------------------------------|---------------------------------------|------|------|------|------|
| Annual Loss Rate (%/yr)                                                                                                                                     | Annual Standard Arm Event Rate (%/yr) |      |      |      |      |
|                                                                                                                                                             | 3.5                                   | 3.75 | 4.0  | 4.25 | 4.5  |
| 1                                                                                                                                                           | 77.9                                  | 80.5 | 82.7 | 84.8 | 86.6 |
| 2                                                                                                                                                           | 76.9                                  | 79.5 | 81.9 | 83.9 | 85.8 |
| 3                                                                                                                                                           | 75.9                                  | 78.6 | 80.9 | 83.1 | 85.0 |

4835

4836

4837 In ALLHAT, the event rate was 6.99 %/yr among participants at least 75 years old. Applying the  
 4838 same halving as was done above for the entire sample, we will assume that the event rate in  
 4839 SPRINT will be 3.5 %/year among participants ≥75 years old. Power for the primary outcome  
 4840 among SPRINT Senior for a range of event rates and annual loss rates is presented in Table 3  
 4841 for the assumed effect size of 25%.

4842  
4843

| Table 3. Power for the primary outcome in Senior subsample ( $\geq 75$ years old) of 3250 participants for a 25% effect (Hazard Ratio of 0.75). |                                       |      |      |      |      |
|-------------------------------------------------------------------------------------------------------------------------------------------------|---------------------------------------|------|------|------|------|
| Annual Loss Rate (%/yr)                                                                                                                         | Annual Standard Arm Event Rate (%/yr) |      |      |      |      |
|                                                                                                                                                 | 3.0                                   | 3.25 | 3.5  | 3.75 | 4.0  |
| 1                                                                                                                                               | 79.9                                  | 82.8 | 85.3 | 87.5 | 89.4 |
| 2                                                                                                                                               | 79.0                                  | 81.9 | 84.5 | 86.7 | 88.6 |
| 3                                                                                                                                               | 78.0                                  | 81.0 | 83.6 | 85.9 | 87.9 |

4844  
4845

4846 **APPENDIX 3: Computational Details and Sensitivity Analyses for the MIND**  
 4847 **outcomes**  
 4848

4849 *Dementia.* The primary outcome for SPRINT MIND is all-cause dementia. Table 1 summarizes  
 4850 dementia rates from HYVET-COG (Peters, 2008), the Ginkgo Evaluation of Memory Study  
 4851 (GEMS) (DeKosky, 2008), the Cardiovascular Health Study (CHS) (Fitzpatrick, 2004) and the  
 4852 Women’s Health Initiative Memory Study (WHIMS) (Shumaker, 2004). In HYVET-COG, there  
 4853 was a 14% non-significant decline in dementia. Overall annual dementia rate varied from  
 4854 0.13% to 3.86%. The Women’s Health Initiative Memory Study (WHIMS) (Shumaker, 2004)  
 4855 recruited women 65 and older with a mean age of 69 in two hormone replacement therapy  
 4856 interventions. Both trials were stopped early because of unexpected increased health risks in  
 4857 women receiving the hormone therapy. Of the studies reported here, WHIMS may be the least  
 4858 similar to SPRINT.  
 4859  
 4860

Table 1. Annual rates of dementia from previous studies.

| <u>Age</u> | <u>eGFR</u> | <u>HYVET-COG</u> | <u>GEMS</u>              | <u>CHS</u> | <u>WHIMS</u> |
|------------|-------------|------------------|--------------------------|------------|--------------|
| <75        |             |                  |                          | 1.29       | 0.08         |
| 75+        | <45         |                  | 3.09 (3.86) <sup>1</sup> | 4.55       | 0.81         |
|            | 45-59.9     |                  | 4.87 (6.39)              |            |              |
|            | 60-89.9     |                  | 3.02 (3.20)              |            |              |
|            | 90+         |                  | 2.87 (3.70)              |            |              |
| 80+        |             | 3.50             | 3.86 (4.51)              |            |              |
| ALL        |             | 3.50             | 3.09 (3.86)              | 2.62       | 0.13         |

4861 <sup>1</sup> With prior CVD  
 4862

4863 Based on these data and the expected number of SPRINT participants 75 or older, and with  
 4864 CKD or MCI at baseline, we expect the annual event rate in SPRINT to be 3.1%-3.5%. In meta-  
 4865 analyses performed by the HYVET investigators, three of the four trials had hazard ratios  
 4866 ranging from 0.84 to 0.90. A reasonable goal for SPRINT MIND is to detect a relative difference  
 4867 between arms expressed by a hazard ratio of 0.5 to 0.8 for dementia. Using a 2-sided  
 4868 proportional hazards regression test of time until first incidence of dementia, we can expect at  
 4869 least 79% power for annual dementia rates of 3.1%-3.5% and an effect size of 0.15 and 96%  
 4870 power for annual dementia rates of 3.2%-3.5% and an effect size of 0.20.  
 4871

4872 *Cognitive Function.* SPRINT will include 2,800 participants receiving the extended cognitive  
 4873 battery at baseline, and years 2 and 4 post randomization. We obtained the standard deviations  
 4874 for several of the tests included in the SPRINT battery to determine detectable differences. The  
 4875 standard deviation for the Digit Symbol Substitution Test is from actual ACCORD MIND data 40  
 4876 months post randomization adjusted for baseline and stratifying factors. Actual means were not  
 4877 available so we used the ACCORD MIND assumptions in their sample size calculations based  
 4878 on CHS data. GEMS provided us with standard deviations and means for Trails A & B, Digit  
 4879 Span and the Boston Naming Test. Table 2 shows that we can detect mean differences for  
 4880 each test of 5.1% or less between the two SPRINT treatment groups at year 4, with 90%

4881 statistical power, assuming 3%/year loss to follow-up. The statistical power will even be  
 4882 increased when combining the scores for these tests in each domain.

4883  
 4884

Table 2. Means, standard deviations and power for cognitive tests.

| Cognitive Test                  | Mean (STD)                           | Power       |             |
|---------------------------------|--------------------------------------|-------------|-------------|
|                                 |                                      | 80%         | 90%         |
| Effect Size                     |                                      | 0.114       | 0.132       |
| Digit Symbol Substitution Test  | 39.5 <sup>1</sup> (7.9) <sup>2</sup> | 0.90 (2.4%) | 1.05 (2.7%) |
| Trails A <sup>3</sup>           | 47.5 (18.1)                          | 2.07 (4.4%) | 2.40 (5.1%) |
| Trails B <sup>3</sup>           | 124.4 (40.6)                         | 4.65 (3.7%) | 5.38 (4.3%) |
| Digit Span <sup>3</sup>         | 13.9 (2.6)                           | 0.30 (2.2%) | 0.34 (2.4%) |
| Boston Naming Test <sup>3</sup> | 26.2 (2.6)                           | 0.30 (1.1%) | 0.34 (1.3%) |

4885 <sup>1</sup> From ACCORD MIND assumptions in sample size calculations based on CHS data

4886 <sup>2</sup> From actual ACCORD MIND data at 40 months post randomization

4887 <sup>3</sup> From GEMS at 48 months post randomization

4888

4889 *MRI.* We will perform MRI in 640 of SPRINT MIND participants. The standard deviations for  
 4890 total abnormal tissue volume and total brain volume from the ACCORDMIND study 40 months  
 4891 post randomization adjusted for baseline and cranial size are 2.77 cm<sup>3</sup> and 16.45 cm<sup>3</sup>. The final  
 4892 analysis of the MRI data collected in SPRINT MIND will compare the mean total abnormal  
 4893 tissue and mean total brain volumes between the groups, controlling for the baseline MRI value  
 4894 and cranial side. With 640 participants (320 participants in each treatment group), after  
 4895 accounting for a 3%/yr loss to-follow-up, and assuming a 0.05 two-sided significance level, we  
 4896 will be able to detect group differences in total abnormal vascular lesion volumes of 0.65 cm<sup>3</sup>  
 4897 and 0.76 cm<sup>3</sup>, and in total brain volumes of 3.9 cm<sup>3</sup> and 4.5 cm<sup>3</sup> over 4 years, with 80% and  
 4898 90% power, respectively.



4899 **APPENDIX 4: SPRINT Organizational Chart**  
 4900 **Committees and Subcommittees**

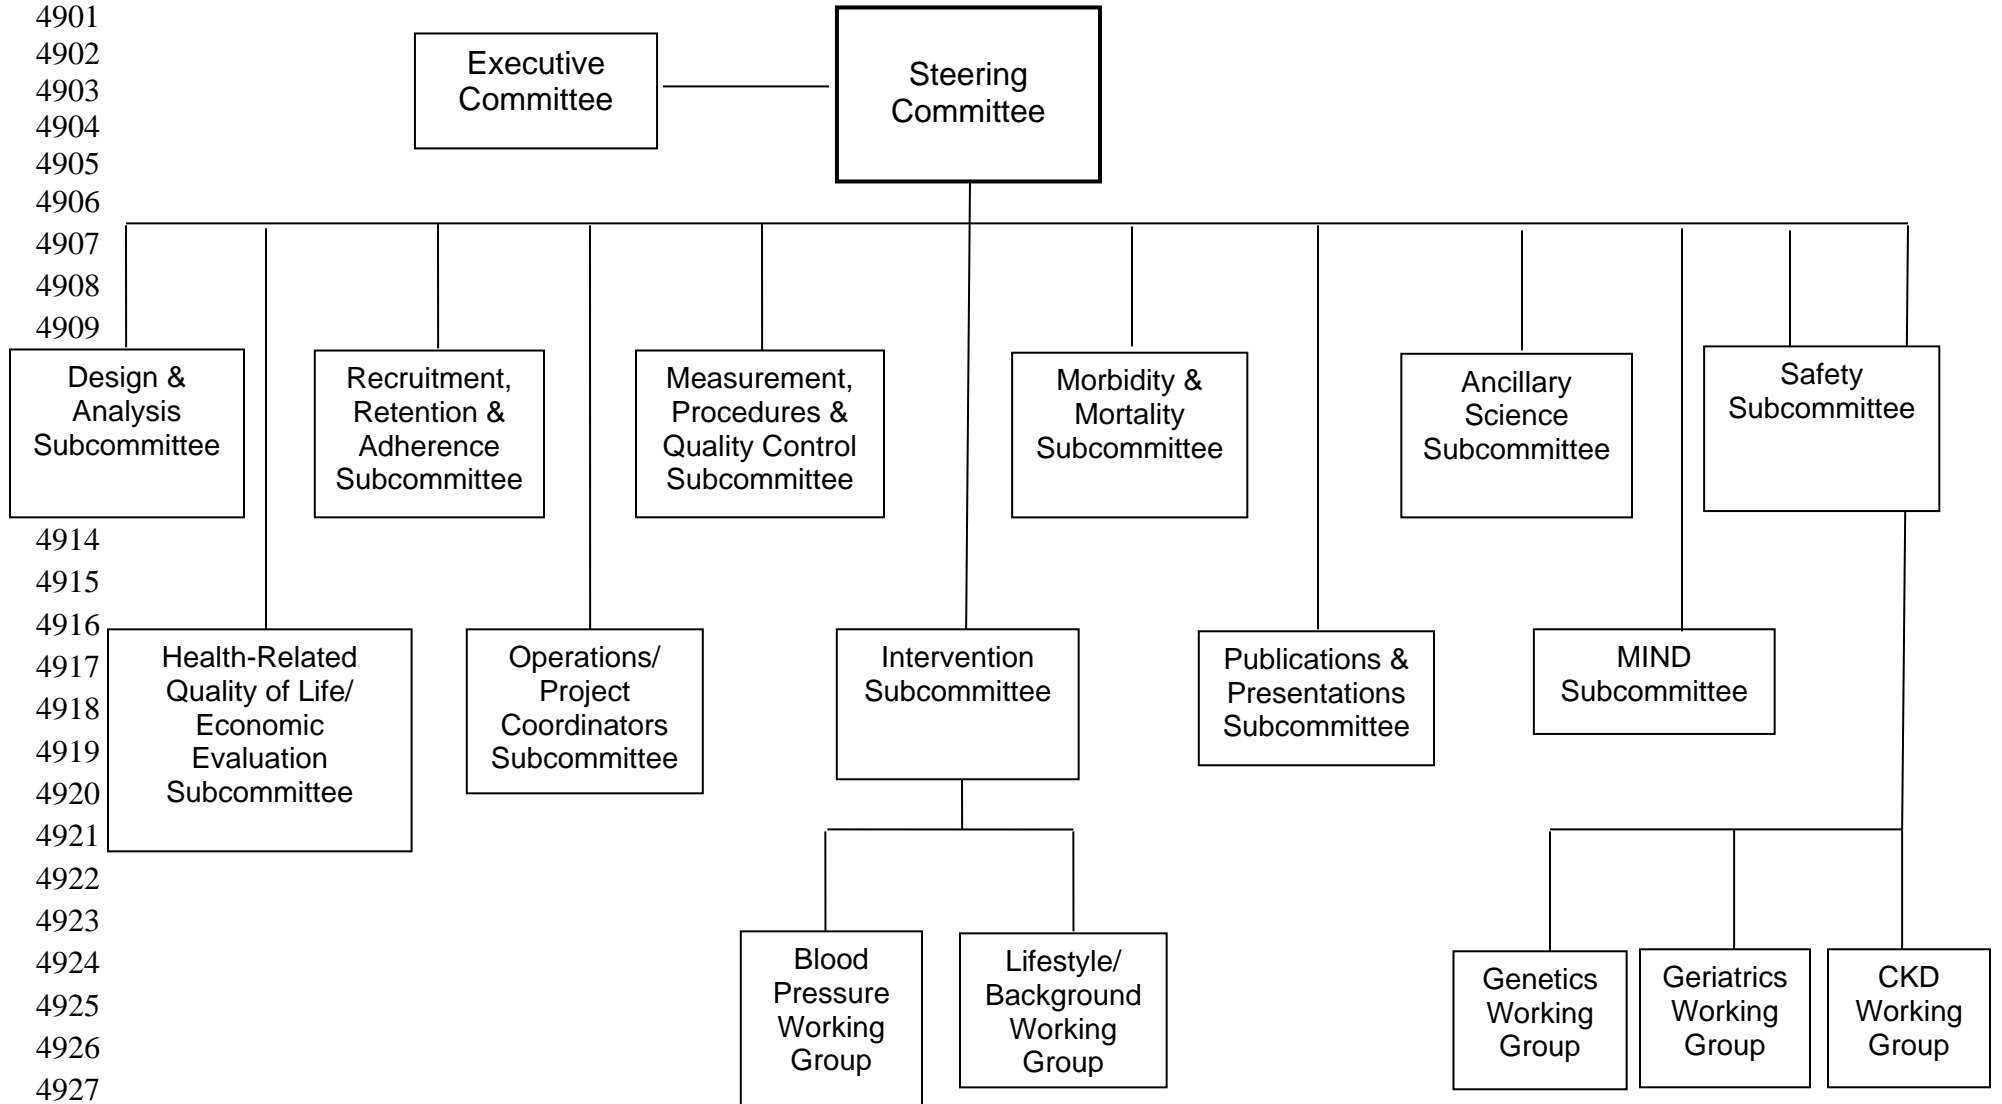

4929 **APPENDIX 5**

4930 **SPRINT Charges & Membership of Committees & Subcommittees**

4931  
4932 Below are the charges of the committees and subcommittees to the Steering Committee. Each  
4933 subcommittee will assume additional responsibilities as deemed necessary by the SPRINT  
4934 Steering or Executive Committee.

4935  
4936 SPRINT Steering Committee (SC) provides the overall leadership for the trial and establishes  
4937 the scientific and administrative policies. It will be led by the independent Study Chair, who is  
4938 also the Chair of the Steering Committee. The Vice Chair of the Steering Committee, who may  
4939 be a CCN or a clinical site PI, will be a permanent SC member and also will be the Vice Chair of  
4940 the Executive Committee. Other members of the Steering Committee include the Principal  
4941 Investigators (PIs) from the Clinical Center Networks (CCNs), NIH representatives (from the  
4942 NHLBI, NIDDK, NIA and NINDS), Coordinating Center (CC) staff, and other subcommittee  
4943 chairs as needed. This committee oversees the overall conduct of the trial throughout all  
4944 phases. The SC provides the leadership for the trial design, the protocol, Manual of Procedures  
4945 (MOP), and study forms, all of which require final SC approval. This committee oversees  
4946 recruitment, intervention, follow-up, and data collection practices and procedures to identify and  
4947 correct deficiencies. They will consider adopting changes in the study protocol or procedures as  
4948 necessary during the course of the SPRINT trial. Voting members will include the CCN PIs, the  
4949 CC PI, and the NIH Project Office (which includes the joint interests of the four NIH funding  
4950 institutions – NHLBI, NIDDK, NIA, and NINDS). The Steering Committee Chair will vote in the  
4951 case of a tie.

4952  
4953 SPRINT Executive Committee (EC) is the operational arm of the Steering Committee and  
4954 makes decisions on behalf of the Steering Committee (SC) on day-to-day operational issues  
4955 that require immediate action. This committee will consist of the Study Chair, SC Vice Chair,  
4956 CC PI, NIH Project Office staff, Drug Distribution Center director, Project Coordinators/  
4957 Operations Subcommittee Chair, one rotating CCN PI, CC Program Coordinator, CC staff, and  
4958 other subcommittee chairs as needed. This committee will meet by conference call every other  
4959 week or as needed. The Executive Committee will develop the SC meeting agenda and  
4960 timeline for completion of tasks. Important study issues, protocol changes, and other items will  
4961 be discussed by the EC prior to presentation to the full SC for review and approval.

4962  
4963 SPRINT Conflict of Interest Committee: This committee reviews potential conflict of interest  
4964 issues. The NIH Project Office, Steering Committee Chair, and CC Chair comprise this  
4965 committee, which has the overall responsibility for the trial's ethical oversight policy and  
4966 procedures.

4967  
4968 **Subcommittees:**

4969  
4970 In general, each subcommittee will have representative(s) from the Coordinating Center, from  
4971 each CCN, and from the NIH Project Office. Together the Steering Committee and each  
4972 subcommittee should determine the expertise required for the given subcommittee. For  
4973 example, the Intervention Subcommittee should include experts in hypertension, nephrology,  
4974 neurology, and geriatrics. In addition, the various subcommittees may form working groups to  
4975 address major issues within their charge (e.g., Genetics Working Group, CKD Working Group).  
4976 The subcommittee and the CC will decide what periodic reports the subcommittee needs to  
4977 perform its charge.

4978

4979 Ancillary Science Subcommittee (AS): This subcommittee is charged with developing  
4980 procedures for review and approval by the SC for ancillary studies and substudies. The AS will  
4981 review proposals for feasibility and compatibility with the main study protocol and aims. Specific  
4982 evaluation criteria include participant and study burden. There will be substantial statistical  
4983 support to the development of ancillary studies through this committee. It is suggested to have  
4984 all 5 CCNs represented on this committee.

4985  
4986 Design and Analysis Subcommittee (D&A): This subcommittee will review the currently  
4987 proposed and alternative designs for the trial, including the analysis plan, the impact on sample  
4988 size, statistical power and patient recruitment, as well as sequential monitoring, subgroup  
4989 monitoring, and adjustments for multiple comparisons. This subcommittee will work closely with  
4990 the Intervention Subcommittee and the Recruitment, Retention and Adherence Subcommittee  
4991 on the development of analysis plans for recruitment and adherence monitoring.

4992  
4993 Economic Evaluation/Health Related Quality of Life Subcommittee: This subcommittee will  
4994 develop the protocol for the economic evaluation of the SPRINT interventions and the protocol  
4995 for assessing the impact of these interventions on health-related quality of life. This will allow the  
4996 study to estimate overall costs, cost effectiveness and cost utility for the SPRINT interventions.  
4997 This subcommittee also will train the CCNs regarding collection of human resource costs,  
4998 quality of life data and plans for analyses of these data, and provide interim reports to the SC.

4999  
5000 Intervention Subcommittee: This subcommittee is charged with generating all of the blood  
5001 pressure (BP) intervention plans for the trial, including materials, medications, titration  
5002 algorithms and schedules, visit schedules, adherence strategies to the medications protocol and  
5003 all BP monitoring including reports. This committee will consider issues concerning the SPRINT  
5004 intervention on high-risk groups such as the elderly, CKD patients, and groups at highest risk for  
5005 heart failure. The Intervention Subcommittee will provide guidelines on the standard of care for  
5006 both treatment arms, as well as lifestyle choices, such as exercise, limiting salt, smoking  
5007 cessation and medical management strategies. An additional charge for this subcommittee is to  
5008 monitor the safety of the interventions and to make recommendations regarding any possible  
5009 changes to the protocol and MOP for patient safety reasons. This subcommittee will likely have  
5010 working groups such as a Medications Working Group and Lifestyle/Background Working Group  
5011 to provide plans for standard of care.

5012  
5013 Measurements, Procedures and Quality Control Subcommittee (MPQC): This subcommittee is  
5014 charged with developing and implementing the quality assurance and control mechanisms for  
5015 the study. The MPQC Subcommittee will work with the Central Lab in developing procedures  
5016 for biological sample collection, processing, shipping, storage, and analysis – as well as a blood  
5017 drawing and aliquoting scheme to reflect the storage of specimens for future use. This  
5018 subcommittee will work with the ECG Reading Center to develop quality control procedures to  
5019 ensure high quality data. Initially, this subcommittee will establish criteria under which the study  
5020 will be expected to perform. This subcommittee will require communication with the CC in  
5021 overseeing the quality assurance procedures, such as the standardized collection of data at all  
5022 CCNs and clinical sites. They will monitor all quality control as well, and will work closely with  
5023 the CC in producing quality control reports. The CC will provide the necessary information to  
5024 the subcommittee, such as data entry quality control and missing data reports. If quality control  
5025 is an issue based on site visits reports, the MPQC Subcommittee will be alerted and requested  
5026 to provide recommendations to the Steering Committee, as all site visit reports are reviewed by  
5027 this subcommittee to determine if any action is warranted. This subcommittee will develop site  
5028 visit protocols and CCN “report cards.” Clear definitions of the boundaries for the CC and CCN  
5029 monitoring responsibilities will be drafted.

5030 Mortality and Morbidity Subcommittee (M&M): This subcommittee will initially be responsible for  
5031 developing event definitions and classifications and coding guidelines, then subsequent  
5032 adjudication procedures. The M&M Subcommittee will be responsible for establishing the  
5033 guidelines for cause of death; diagnosis of MI, stroke, and heart failure; and evaluating other  
5034 cardiac events and the trial endpoints. They will jointly monitor all classifications of events,  
5035 oversee the data collection of events, including forms design, and will serve as the liaison  
5036 between the CCNs, clinical sites and the CC for the events ascertainment data collection. This  
5037 subcommittee will require expertise in neurology, nephrology, and cardiology. The M&M  
5038 subcommittee will function as an adjudication subcommittee once the trial gets underway.  
5039

5040 Presentations and Publications Subcommittee (P&P): This subcommittee is charged with  
5041 developing procedures for review and approval by the SC, and will review all publications,  
5042 presentations, abstracts, and slides of the SPRINT trial and substudy results. The CC and this  
5043 subcommittee will develop procedures to track the development of publications and  
5044 presentations (P&P), as well as strategies for stimulating P&P productivity. Additionally, the CC  
5045 will provide analyses for publications and presentations, and the study web site will provide P&P  
5046 tracking reports and study presentations and publications.  
5047

5048 Project Coordinators/Operations Subcommittee: This subcommittee facilitates communication  
5049 and collaboration among clinical sites, the CCNs, and the Coordinating Center. It focuses on  
5050 recruitment, retention, adherence, and implementation issues, identifying problems early to  
5051 promptly implement solutions. In addition, the Operations subcommittee addresses specific  
5052 CCN and clinic requests for tracking and scheduling reports, missed appointment reports, data  
5053 entry updates or issues requiring attention, and coordinates certification updates and numerous  
5054 data management issues. This subcommittee will include representatives from the CC (e.g.,  
5055 project managers) and from the MRI and ECG Reading Centers, Central Laboratory and Drug  
5056 Distribution Center. The CCN Coordinator Chair of this committee can be rotated annually as  
5057 needed and will serve as a member of the Executive Committee.  
5058

5059 Recruitment, Retention and Adherence Subcommittee: This subcommittee will be charged with  
5060 developing the eligibility criteria, recruitment, retention and adherence to the protocol and  
5061 procedural strategies. Generation of the SPRINT template informed consent and HIPAA  
5062 authorizations will be done in conjunction with other subcommittees, such as PC/Operations,  
5063 MPQC, and Intervention subcommittees. Recruitment and retention strategies will be  
5064 developed with special emphasis on issues pertinent to recruitment of ethnic groups, women,  
5065 those with CKD and the elderly. The subcommittee will develop educational and recruitment  
5066 materials and will provide the culture-specific central training in recruitment strategies. During  
5067 the follow-up phase, this subcommittee will monitor all aspects of retention, including visit and  
5068 procedure adherence, and will provide input on necessary retention tracking reports. This  
5069 subcommittee will collaborate with the Intervention subcommittee to develop strategies and  
5070 tactics to enhance and monitor intervention adherence. This subcommittee also will assist the  
5071 Coordinating Center in monitoring recruitment at the CCNs and clinical sites in order to identify  
5072 recruitment difficulties.  
5073

5074 Safety Subcommittee: This subcommittee is charged with responding to concerns about the  
5075 safety of study participants that may arise during the course of the SPRINT study. Concerns  
5076 related to safety of study intervention, study medication or study procedures will be reviewed by  
5077 the committee and either by addressed directly or referred to another subcommittee/ working  
5078 group as appropriate. Additionally, this committee will help triage issues raised by clinic IRBs  
5079 that are related to safety and review any clinical practice issues that may arise. They may also  
5080 review summaries of study data related to the overall safety of study participation, but not

5081 reported by treatment assignment, and develop related reports for or respond to concerns from  
5082 the Data and Safety Monitoring Board. The Safety Committee will include the Safety Officer,  
5083 representatives from the Intervention Committee, the CKD working group, the MIND Committee,  
5084 the Geriatrics working group, and may be joined by other experts for specific issues as needed.  
5085

5086 SPRINT-MIND Subcommittee: This subcommittee will provide the scientific leadership for  
5087 SPRINT-MIND and will include cognitive functioning, dementia and MRI representatives from  
5088 the CC, CCNs, the NIH (NINDS, NHLBI, NIDDK, and NIA) and the site PI of the MRI Reading  
5089 Center. This subcommittee will monitor all 3 areas of MIND: dementia, cognitive functioning and  
5090 MRI scans, as well as selection of the data collection instruments and training of clinical staff.  
5091 The SPRINT-MIND Subcommittee will serve as the adjudicators for cognition outcomes as  
5092 members of the M&M subcommittee. This subcommittee may utilize working groups as needed,  
5093 such as MIND Operations or MIND Geriatrics Working Group.  
5094

5095 **APPENDIX 6**  
5096 **Participating Sites**

5097  
5098 **SPRINT CLINICAL CENTER NETWORKS**

5099  
5100 **Ohio/Case Western Reserve CCN**  
5101 Network Hub: Case Western Reserve (PI: Jackson Wright, MD)  
5102 Bolwell Suite 2200  
5103 11100 Euclid Ave  
5104 Cleveland, OH 44106-6053

5105  
5106 **Southeast CCN**  
5107 Network Hub: Wake Forest University Health Sciences (PI: Michael Rocco, MD)  
5108 Wake Forest University Health Sciences  
5109 Section on Nephrology  
5110 Medical Center Blvd  
5111 Winston-Salem, NC 27157-1063

5112  
5113 **University of Alabama – Birmingham CCN**  
5114 Network Hub: University of Alabama, Birmingham (PI: Suzanne Oparil, MD)  
5115 703 19<sup>th</sup> St South  
5116 ZRB 1034  
5117 Birmingham, AL 35294

5118  
5119 **Utah CCN**  
5120 Network Hub: University of Utah (PI: Alfred Cheung, MD)  
5121 Dialysis Program/University of Utah  
5122 Ezekiel R & Edna Dunke Bldg  
5123 84 N Medical Dr East, Room 201  
5124 Salt Lake City, UT 84108

5125  
5126 **Veteran’s Administration (VA) CCN**  
5127 Network Hub: Memphis, TN (PI: Bill Cushman, MD)  
5128 Hypertension and Lipids Research  
5129 111Q/1030 Jefferson Ave  
5130 Memphis, TN 38104-2193

5131  
5132 **SPRINT COORDINATING CENTER**  
5133 (PI: David M Reboussin, PhD)  
5134 Wake Forest University Health Sciences  
5135 Division of Public Health Sciences  
5136 Department of Biostatistical Sciences  
5137 Medical Center Blvd, Wells Fargo-21  
5138 Winston-Salem, NC 27157

5139  
5140  
5141  
5142  
5143 **SPRINT CENTRAL RESOURCE CENTERS**  
5144 Drug Distribution Center (PI: Mike Sather, Rob Ringer)

5145 VA Cooperative Studies Program  
5146 Clinical Research Pharmacy Coordinating Center  
5147 2401 Centre Ave SE  
5148 Albuquerque, NM 87106  
5149  
5150 ECG Reading Center (PI: Elsayed Soliman)  
5151 EPICARE  
5152 Wake Forest University Health Sciences  
5153 Medical Center Blvd, Wells Fargo-13  
5154 Winston-Salem, NC 27157  
5155  
5156 MRI Reading Center (PI: R. Nick Bryan)  
5157 Brain Magnetic Resonance Imaging Reading Center  
5158 University of Pennsylvania  
5159 Section of Biomedical Image Analysis  
5160 3400 Spruce St  
5161 Philadelphia, PA 19104  
5162  
5163 Central Lab (PI: Tony Killeen)  
5164 University of Minnesota Collaborative Studies Clinical Lab  
5165 420 Delaware St SE  
5166 Minneapolis, MN 55455  
5167  
5168  
5169 **FEDERAL SPONSORS**  
5170  
5171 National Institutes of Health (NIH)  
5172 National Heart, Lung, and Blood Institute (NHLBI)  
5173 National Institute of Neurological Disorders and Stroke (NINDS)  
5174 National Institute on Aging (NIA)  
5175 National Institute of Diabetes and Digestive and Kidney Diseases (NIDDK)  
5176
